# Supplementary material for: Iron-mediated divergent reductive coupling reactions of heteroarenes with alkenes
Source: Royal Society of Chemistry journal article supplement (doi:10.1039/d2qo01985j), 2023-01-01

# Supplementary Information

## Iron mediated divergent reductive coupling reactions of heteroarenes with alkenes

Cong Zhang,<sup>a</sup> Yuhang He,<sup>a</sup> Guanghui An<sup>a\*</sup>

*<sup>a</sup> School of Chemistry and Materials Science, Heilongjiang University,  
Harbin 150080, China.*

Email: [chemagh@163.com](mailto:chemagh@163.com); [gml\\_2000@163.com](mailto:gml_2000@163.com)

### Table of Contents

|                                                                    |     |
|--------------------------------------------------------------------|-----|
| 1. General Information .....                                       | S2  |
| 2. Substrate Structures .....                                      | S2  |
| 3. Preparation of Fe(dibm) <sub>3</sub> .....                      | S3  |
| 4. Optimization of C2 Alkylation .....                             | S4  |
| 5. Optimization of Reductive Alkylation .....                      | S7  |
| 6. General Procedures for Synthesis of Compounds .....             | S9  |
| 7. Cyclohexyl Radical Capture Experiment .....                     | S10 |
| 8. Prove the Formation of Ph( <i>i</i> -PrO)SiH <sub>2</sub> ..... | S10 |
| 9. Unsuccessful Substrates .....                                   | S11 |
| 10. Characterization Data of the Compounds .....                   | S12 |
| 11. Reference .....                                                | S26 |
| 12. Copies of <sup>1</sup> H and <sup>13</sup> C NMR Spectra ..... | S27 |

## 1. General Information

Unless otherwise noted, all reagents were obtained from commercial suppliers (Adamas-beta) and used without further purification. The reaction product was isolated by column chromatography on a silica gel (236–400 mesh) column using petroleum ether (PE) with a boiling range from 60 to 90 °C and EtOAc.  $^1\text{H}$ ,  $^{13}\text{C}$  NMR and  $^{19}\text{F}$  NMR spectra were recorded on 400, 101, 376 MHz NMR spectrometers using  $\text{CDCl}_3$  and  $\text{DMSO}-d_6$  as solvent. In addition,  $^1\text{H}$ , and  $^{13}\text{C}$  NMR spectra used tetramethylsilane as the internal standard and the  $^{19}\text{F}$  NMR spectra used trifluoroacetic acid as the internal standard. HRMS were made by means of ESI. Unless otherwise noted, all reagents were weighed and handled in air, and all reactions were performed in air.

## 2. Substrate Structures

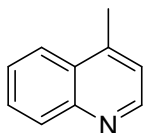

1a

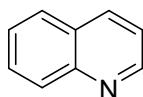

1b

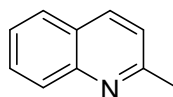

1c

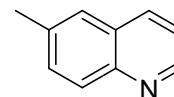

1d

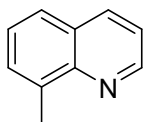

1e

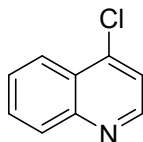

1f

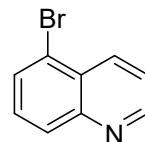

1g

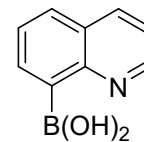

1h

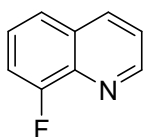

1i

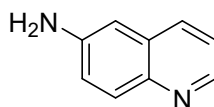

1j

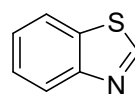

1k

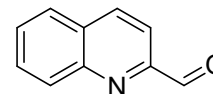

1l

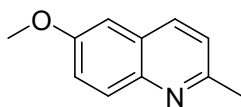

1m

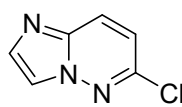

1n

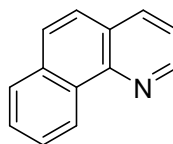

1o

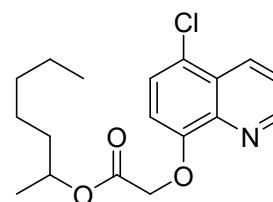

1p

### Scheme S1. Substrate Structures

#### 3. Preparation of Fe(dibm)<sub>3</sub>

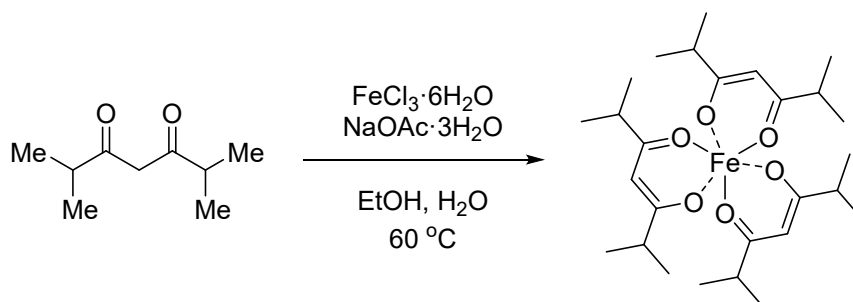

**Iron(III) diisobutyrylmethane.** To a biphasic mixture of 2,6-dimethylheptane-3,5-dione (2.60 g, 16.6 mmol, 3.0 equiv) and NaOAc (1.36 g, 16.6 mmol, 3.0 equiv) in an aqueous solution of EtOH (1:1 EtOH:H<sub>2</sub>O, 42 mL) was added ground FeCl<sub>3</sub>·6H<sub>2</sub>O (1.50 g, 5.55 mmol, 1.0 equiv). A red slurry formed and the reaction mixture was heated at 60 °C with stirring for 1 h. The slurry was cooled at room temperature over 10 min, cooled at 0 °C for 15 min, and then filtered to give an orange powder. The orange powder was rinsed with H<sub>2</sub>O, collected, placed in an Erlenmeyer flask, and heated with an aqueous solution of EtOH (9:1 EtOH:H<sub>2</sub>O, 30 mL) using a heat gun until fully dissolved to give a red, homogenous solution. The solution was cooled to room temperature and then to 0 °C to give red crystals, which were filtered and rinsed with a -78 °C aqueous solution of EtOH (9:1 EtOH:H<sub>2</sub>O, 10 mL) to furnish Fe(dibm)<sub>3</sub> as a red crystalline solid (1.20 g, 2.31 mmol, 14%).<sup>1</sup>

## 4. Optimization of C2 Alkylation

Table S1. Screening of Catalyst<sup>a</sup>

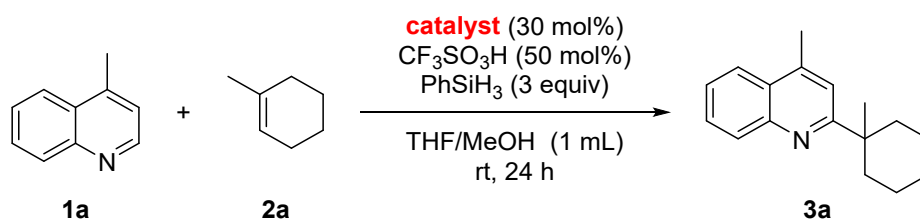

| Entry | Catalyst                    | Yield(%) <sup>b</sup> |
|-------|-----------------------------|-----------------------|
| 1     | Fe(acac) <sub>3</sub>       | 29                    |
| 2     | Fe(dibm) <sub>3</sub>       | 45                    |
| 3     | Fe(dpm) <sub>3</sub>        | 31                    |
| 4     | Mn(dpm) <sub>3</sub>        | 20                    |
| 5     | Co(acac) <sub>2</sub> (II)  | N.R                   |
| 6     | Co(acac) <sub>2</sub> (III) | N.R                   |
| 7     | Ni(acac) <sub>2</sub>       | N.R                   |
| 8     | Salen-Co                    | N.R                   |
| 9     | Co 1                        | N.R                   |
| 10    | Co 2                        | 13                    |
| 11    | Co 3                        | N.R                   |
| 12    | Co 4                        | N.R                   |
| 13    | Co 5                        | N.R                   |
| 14    | Co 6                        | N.R                   |
| 15    | Co 7                        | N.R                   |

<sup>a</sup>Reaction conditions: **1a** (0.2 mmol, 1.0 equiv), **2a** (0.6 mmol, 3.0 equiv), catalyst (30 mol%), CF<sub>3</sub>SO<sub>3</sub>H (50 mol%) and PhSiH<sub>3</sub> (3 equiv) was added in 1 mL of THF/MeOH (4:1) under air for 24 h. <sup>b</sup>Isolated products. N.R.=No reaction.

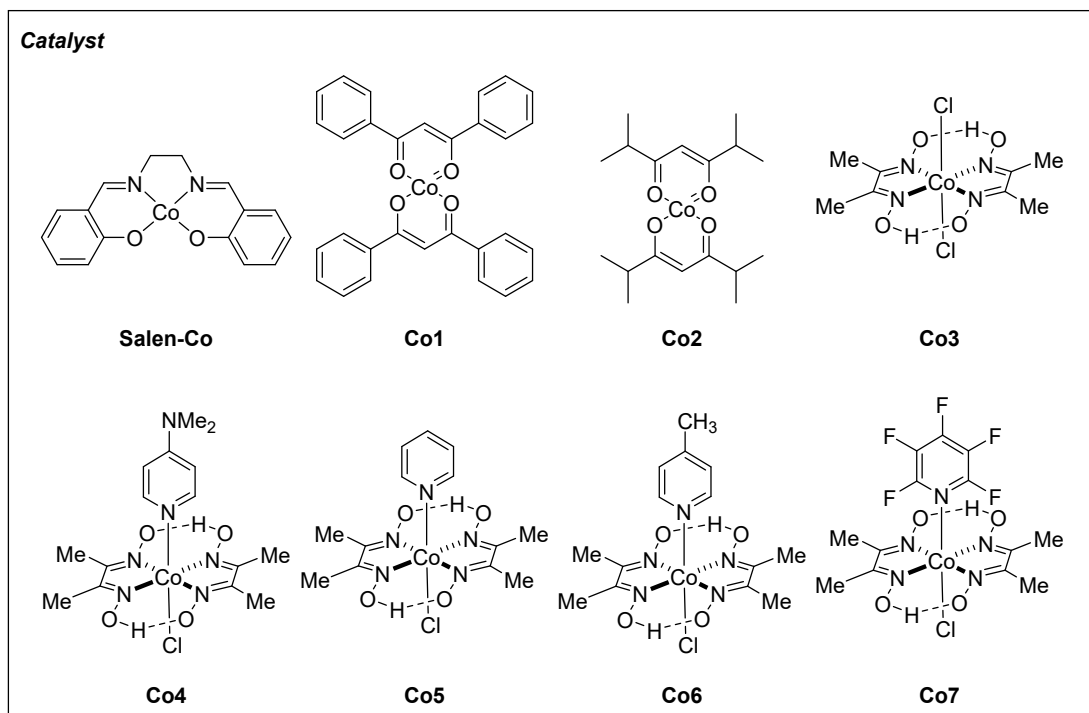

**Scheme S2.** Catalysts

**Table S2.** Screening of Acid Additives<sup>a</sup>

| Entry | Acid                               | Yield(%) <sup>b</sup> |
|-------|------------------------------------|-----------------------|
| 1     | CF <sub>3</sub> SO <sub>3</sub> H  | 45                    |
| 2     | CF <sub>3</sub> COOH               | 12                    |
| 3     | ClCH <sub>2</sub> COOH             | <5                    |
| 4     | CH <sub>3</sub> COOH               | <5                    |
| 5     | C <sub>6</sub> H <sub>5</sub> COOH | 37                    |
| 6     | TsOH•H <sub>2</sub> O              | 37                    |
| 7     | HFIP                               | <5                    |

<sup>a</sup>Reaction conditions: **1a** (0.2 mmol, 1.0 equiv), **2a** (0.6 mmol, 3.0 equiv), Fe(dibm)<sub>3</sub> (30 mol%), acid (50 mol%) and PhSiH<sub>3</sub> (3 equiv) was added in 1 mL of THF/MeOH (4:1) under air 24 h. <sup>b</sup>Isolated products. N.R.=No reaction.

**Table S3.** The Amount of Acid<sup>a</sup>

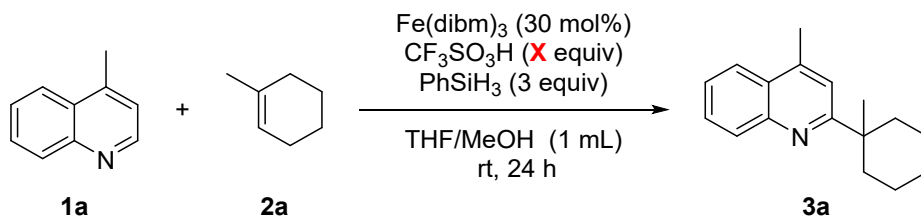

| Entry | $\text{CF}_3\text{SO}_3\text{H}$ (equiv) | Yield(%) <sup>b</sup> |
|-------|------------------------------------------|-----------------------|
| 1     | 0.8                                      | 24                    |
| 2     | 0                                        | 6                     |
| 3     | 0.5                                      | 45                    |

<sup>a</sup>Reaction conditions: **1a** (0.2 mmol, 1.0 equiv), **2a** (0.6 mmol, 3.0 equiv),  $\text{Fe(dibm)}_3$  (30 mol%),  $\text{CF}_3\text{SO}_3\text{H}$  (X equiv) and  $\text{PhSiH}_3$  (3 equiv) was added in 1 mL of THF/MeOH (4:1) under air 24 h. <sup>b</sup>Isolated products. N.R.=No reaction.

**Table S4.** Screening of Solvent<sup>a</sup>

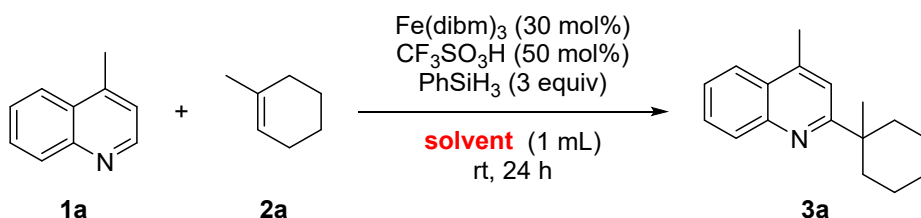

| Entry | Solvent                   | Yield(%) <sup>b</sup> |
|-------|---------------------------|-----------------------|
| 1     | THF/EtOH (4:1)            | 49                    |
| 2     | EtOH                      | 37                    |
| 3     | HFIP                      | 15                    |
| 4     | THF/HFIP (4:1)            | 14                    |
| 5     | THF/MeOH (4:1)            | 45                    |
| 6     | THF/TBA (4:1)             | 25                    |
| 7     | TBA                       | 14                    |
| 8     | THF                       | 13                    |
| 9     | <i>i</i> -PrOH            | 43                    |
| 10    | THF/ <i>i</i> -PrOH (4:1) | 63                    |
| 11    | THF/ <i>i</i> -PrOH (8:1) | 67                    |
| 12    | THF/ <i>i</i> -PrOH (6:1) | 69                    |
| 13    | THF/ <i>i</i> -PrOH (2:1) | 62                    |
| 14    | THF/ <i>i</i> -PrOH (1:1) | 69                    |

<sup>a</sup>Reaction conditions: **1a** (0.2 mmol, 1.0 equiv), **2a** (0.6 mmol, 3.0 equiv),  $\text{Fe(dibm)}_3$  (30 mol%),  $\text{CF}_3\text{SO}_3\text{H}$  (50 mol%) and  $\text{PhSiH}_3$  (3 equiv) was added in 1 mL of solvent under air 24 h. <sup>b</sup>Isolated products. N.R.=No reaction.

TBA= tert-butanol. HFIP= 1,1,1,3,3,3-hexafluoro-2-propanol. THF= tetrahydrofuran.

**Table S5.** Screening of Temperature and Gas Environment<sup>a</sup>

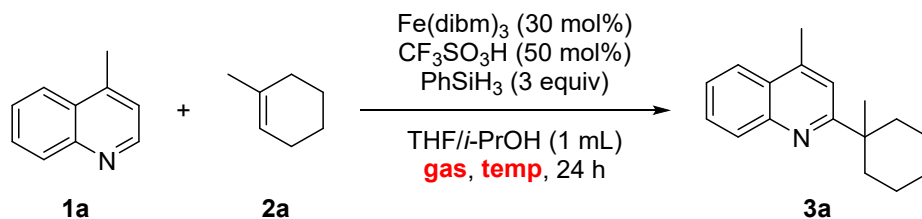

| Entry | Temp(°C) | Gas | Yield(%) <sup>b</sup> |
|-------|----------|-----|-----------------------|
| 1     | 20       | Ar  | 47                    |
| 2     | 20       | Air | 69                    |
| 3     | 40       | Air | 64                    |
| 4     | 60       | Air | 53                    |

<sup>a</sup>Reaction conditions: **1a** (0.2 mmol, 1.0 equiv), **2a** (0.6 mmol, 3.0 equiv),  $\text{Fe(dibm)}_3$  (30 mol%),  $\text{CF}_3\text{SO}_3\text{H}$  (50 mol%) and  $\text{PhSiH}_3$  (3 equiv) was added in 1 mL of THF/*i*-PrOH (6:1) under gas environment 24 h. <sup>b</sup>Isolated products. N.R.=No reaction.

## 5. Optimization of Reductive Alkylation

**Table S6.** Screening of Catalyst<sup>a</sup>

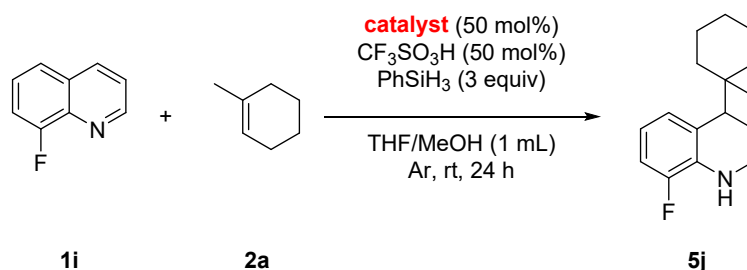

| Entry | Catalyst                        | Yield(%) <sup>b</sup> |
|-------|---------------------------------|-----------------------|
| 1     | $\text{Fe(acac)}_3$             | 72                    |
| 2     | $\text{Fe(dibm)}_3$             | 77                    |
| 3     | $\text{Fe(dpm)}_3$              | 37                    |
| 4     | $\text{Mn(dpm)}_3$              | 33                    |
| 5     | $\text{Co(acac)}_2(\text{II})$  | N.R                   |
| 6     | $\text{Co(acac)}_2(\text{III})$ | N.R                   |
| 7     | $\text{Ni(acac)}_2$             | N.R                   |
| 8     | Salen-Co                        | N.R                   |
| 9     | Co 2                            | N.R                   |
| 10    | Co 5                            | N.R                   |

<sup>a</sup>Reaction conditions: **1i** (0.2 mmol, 1.0 equiv), **2a** (0.6 mmol, 3.0 equiv), catalyst (50 mol%),  $\text{CF}_3\text{SO}_3\text{H}$  (50 mol%) and  $\text{PhSiH}_3$  (3 equiv) was added in 1 mL of THF/MeOH (4:1) under Ar reaction for 24 h. <sup>b</sup>Isolated products. N.R.=No reaction.

**Table S7.** Screening of Acid Additives<sup>a</sup>

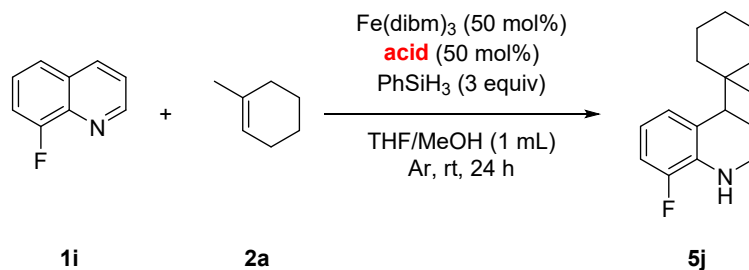

| Entry | Acid                               | Yield(%) <sup>b</sup> |
|-------|------------------------------------|-----------------------|
| 1     | CF <sub>3</sub> SO <sub>3</sub> H  | 77                    |
| 2     | CF <sub>3</sub> COOH               | N.R                   |
| 3     | ClCH <sub>2</sub> COOH             | N.R                   |
| 4     | CH <sub>3</sub> COOH               | N.R                   |
| 5     | C <sub>6</sub> H <sub>5</sub> COOH | N.R                   |
| 6     | TsOH·H <sub>2</sub> O              | 29                    |

<sup>a</sup>Reaction conditions: **1i** (0.2 mmol, 1.0 equiv), **2a** (0.6 mmol, 3.0 equiv), Fe(dibm)<sub>3</sub> (50 mol%), acid (50 mol%) and PhSiH<sub>3</sub> (3 equiv) was added in 1 mL of THF/MeOH (4:1) under Ar reaction for 24 h. <sup>b</sup>Isolated products. N.R.=No reaction.

**Table S8.** Screening of Solvent<sup>a</sup>

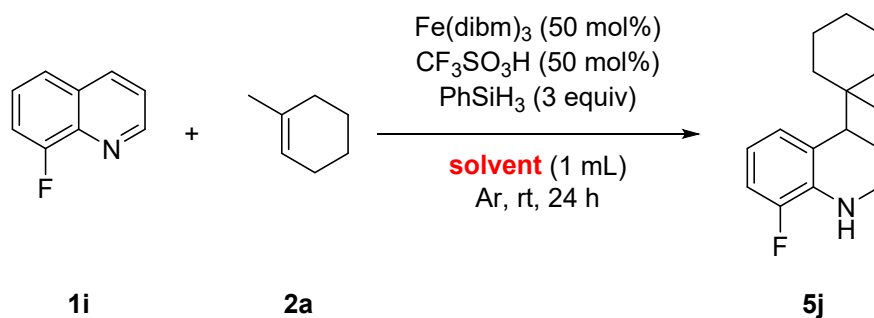

| Entry | Solvent                   | Yield(%) <sup>b</sup> |
|-------|---------------------------|-----------------------|
| 1     | THF/MeOH (4:1)            | 77                    |
| 2     | THF/HFIP (4:1)            | N.R                   |
| 3     | THF/TFE (4:1)             | 21                    |
| 4     | THF/ <i>i</i> -PrOH (4:1) | 61                    |
| 5     | THF/ <i>i</i> -PrOH (6:1) | 37                    |

<sup>a</sup>Reaction conditions: **1i** (0.2 mmol, 1.0 equiv), **2a** (0.6 mmol, 3.0 equiv), Fe(dibm)<sub>3</sub> (50 mol%), CF<sub>3</sub>SO<sub>3</sub>H (50 mol%) and PhSiH<sub>3</sub> (3 equiv) was added in 1 mL of solvent under Ar reaction for 24 h. <sup>b</sup>Isolated products. N.R.=No reaction.

THF= tetrahydrofuran. TFE= trifluoroethanol.

**Table S9.** Screening of Gas Environment<sup>a</sup>



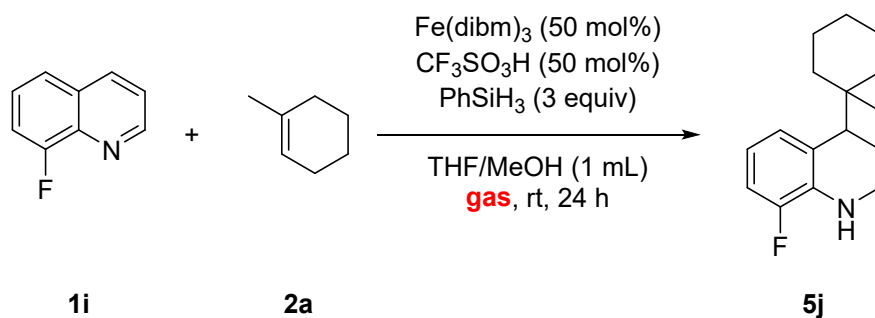

| Entry | Gas            | Yield(%) <sup>b</sup> |
|-------|----------------|-----------------------|
| 1     | O <sub>2</sub> | N.R                   |
| 2     | Ar             | 77                    |
| 3     | Air            | 30                    |

<sup>a</sup>Reaction conditions: **1i** (0.2 mmol, 1.0 equiv), **2a** (0.6 mmol, 3.0 equiv),  $\text{Fe(dibm)}_3$  (50 mol%),  $\text{CF}_3\text{SO}_3\text{H}$  (50 mol%) and  $\text{PhSiH}_3$  (3 equiv) was added in 1 mL of THF/MeOH (4:1) under Ar reaction for 24 h. <sup>b</sup>Isolated products. N.R.=No reaction.

## 6. General Procedures for Synthesis of Compounds

### 6.1 Procedures for Synthesis of Compounds (3a-3u)

A Schlenk flask was charged with heterocycle **1** (0.2 mmol, 1.0 equiv),  $\text{Fe(dibm)}_3$  (30 mol%), and olefin **2** (3 equiv), THF/*i*-PrOH (6:1, 1 mL),  $\text{CF}_3\text{SO}_3\text{H}$  (neat, 50 mol%) and  $\text{PhSiH}_3$  (3 equiv) was added sequentially, and the mixture was stirred vigorously at rt in air for 24 h. The reaction mixture was then cooled to rt and quenched with saturated aqueous solution of  $\text{NaHCO}_3$ . The organic layer was separated and the aqueous layer was extracted with EtOAc. The organic layers were combined, dried over  $\text{Na}_2\text{SO}_4$ , filtered, and concentrated under reduced pressure. The solvent was evaporated in vacuo and the residue was purified by column chromatography on silica gel to give the pure product.

### 6.2 Procedures for Synthesis of Compounds (4a-4b and 5a-5m)

A Schlenk flask was charged with heterocycle **1** (0.2 mmol, 1.0 equiv),  $\text{Fe(dibm)}_3$  (50 mol%), and olefin **2** (3 equiv). The flask was evacuated and backfilled with argon for 3 times. THF/MeOH (4:1, 1 mL),  $\text{CF}_3\text{SO}_3\text{H}$  (neat, 50 mol%) and  $\text{PhSiH}_3$  (3 equiv) was added sequentially, and the mixture was stirred vigorously at rt for 24 h. The reaction mixture was then cooled to rt and quenched with saturated aqueous solution of  $\text{NaHCO}_3$ . The organic layer was separated and the aqueous layer was extracted with EtOAc. The organic layers were combined, dried over  $\text{Na}_2\text{SO}_4$ , filtered, and concentrated under reduced pressure. The solvent was evaporated in vacuo and the residue was purified by column chromatography on silica gel to give the pure product.

## 7. Cyclohexyl Radical Capture Experiment

### 7.1 TEMPO Inhibition Experiment

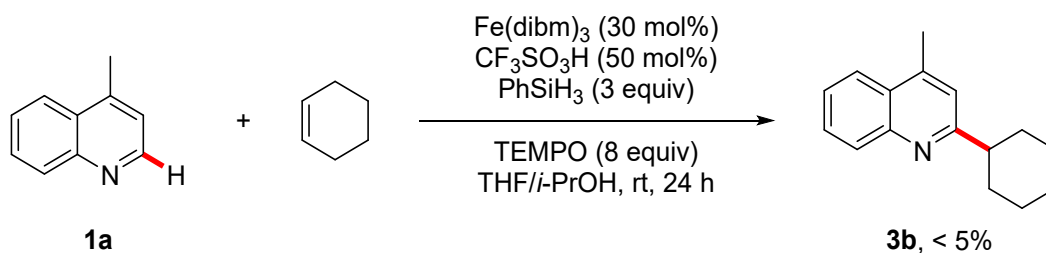

A Schlenk flask was charged with heterocycle **1a** (0.2 mmol, 1.0 equiv), Fe(dibm)<sub>3</sub> (30 mol%), TEMPO (1.6 mmol, 8.0 equiv) and olefin **2** (3 equiv), THF/*i*-PrOH (6:1, 1 mL), CF<sub>3</sub>SO<sub>3</sub>H (neat, 50 mol%) and PhSiH<sub>3</sub> (3 equiv) was added sequentially, and the mixture was stirred vigorously at rt in air for 24 h. The target product yield is inhibited.

### 7.2 1,1-Diphenylethylene Inhibition Experiment

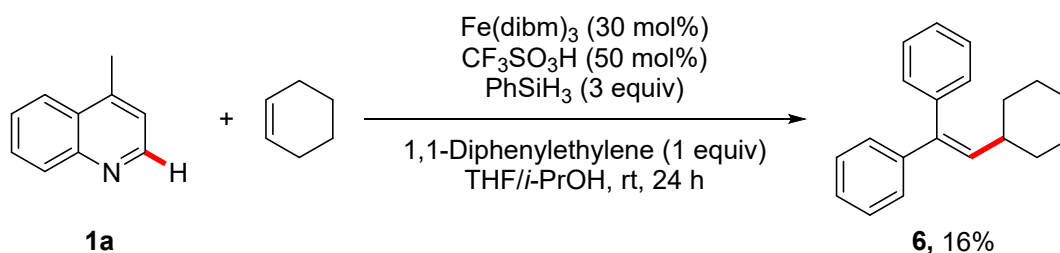

A Schlenk flask was charged with heterocycle **1a** (0.2 mmol, 1.0 equiv), Fe(dibm)<sub>3</sub> (30 mol%), 1,1-diphenylethylene (0.2 mmol, 1.0 equiv) and olefin **2** (3 equiv), THF/*i*-PrOH (6:1, 1 mL), CF<sub>3</sub>SO<sub>3</sub>H (neat, 50 mol%) and PhSiH<sub>3</sub> (3 equiv) was added sequentially, and the mixture was stirred vigorously at rt in air for 24 h. Product **6** was obtained with a yield of 16%. The structure of **6** is confirmed by <sup>1</sup>H NMR analysis as follows.

## 8. Prove the Formation of Ph(*i*-PrO)SiH<sub>2</sub>

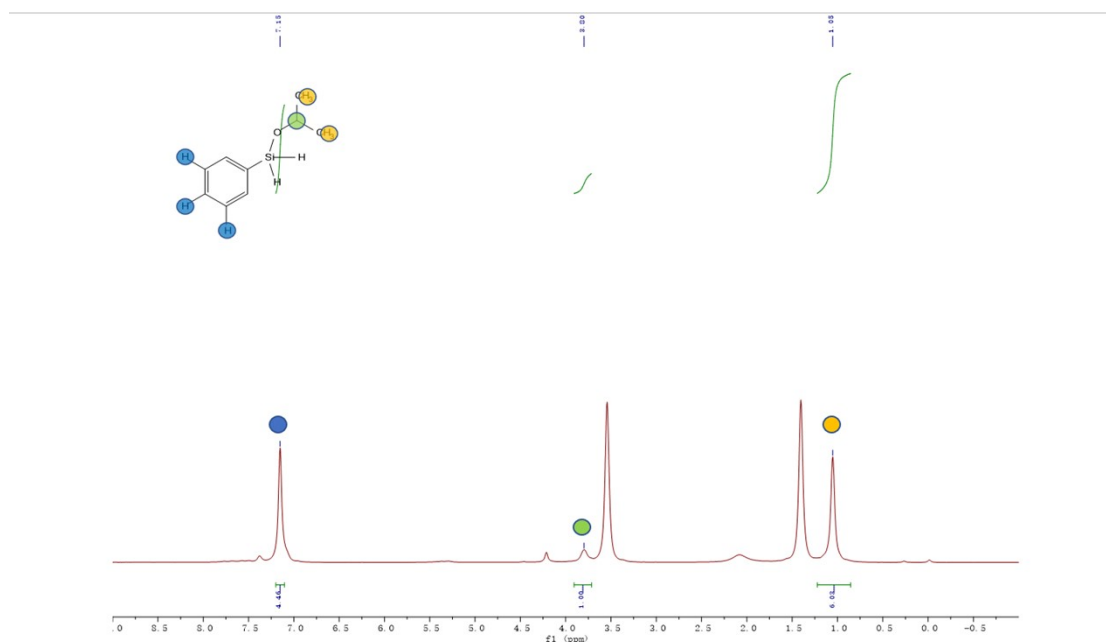

**Figure S1.** Prove the Formation of Ph(*i*-PrO)SiH<sub>2</sub>

## 9. Unsuccessful Substrates

**Table S10.** Unsuccessful Substrates of C2-Alkylation<sup>a,b</sup>

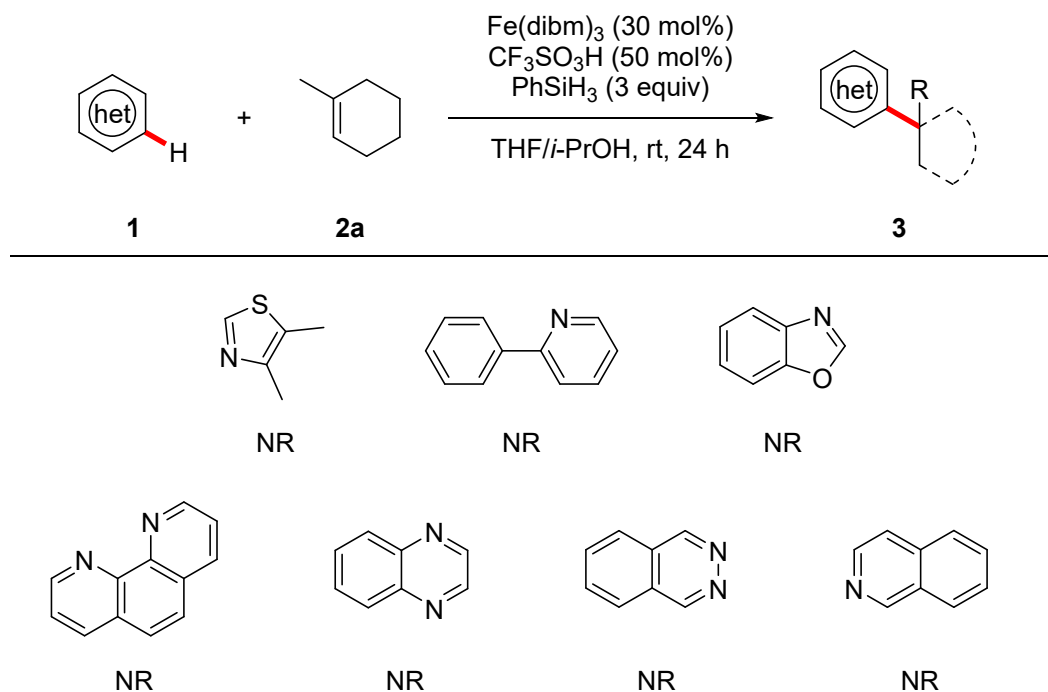

<sup>a</sup>Reaction conditions: **1** (0.2 mmol, 1.0 equiv), **2a** (0.6 mmol, 3.0 equiv), Fe(dibm)<sub>3</sub> (30 mol%), CF<sub>3</sub>SO<sub>3</sub>H (50 mol%) and PhSiH<sub>3</sub> (3 equiv) was added in 1 mL of THF/*i*-PrOH (6:1) under air 24 h. <sup>b</sup>Isolated products. N.R.=No reaction.

**Table S11.** Unsuccessful C4 Reductive Alkylation<sup>a,b</sup>

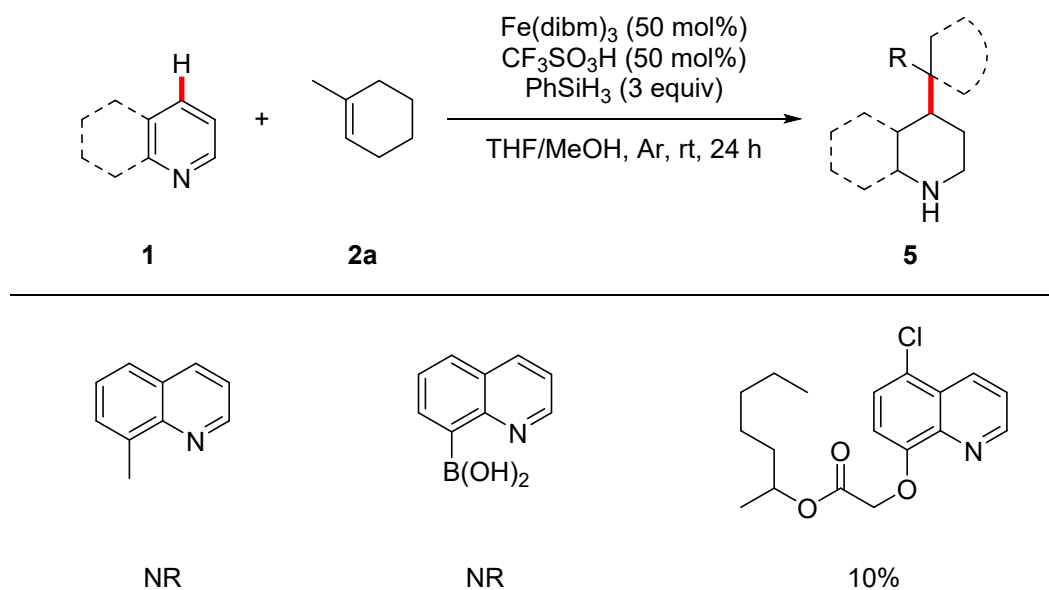

<sup>a</sup>Reaction conditions: **1** (0.2 mmol, 1.0 equiv), **2a** (0.6 mmol, 3.0 equiv),  $\text{Fe}(\text{dibm})_3$  (50 mol%),  $\text{CF}_3\text{SO}_3\text{H}$  (50 mol%) and  $\text{PhSiH}_3$  (3 equiv) was added in 1 mL of THF/MeOH (4:1) under Ar reaction for 24 h. <sup>b</sup>Isolated products. N.R.=No reaction.

## 10. Characterization Data of the Compounds

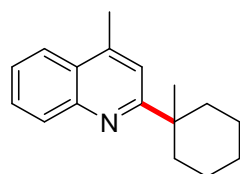

**4-methyl-2-(1-methylcyclohexyl)quinoline (3a)**: Eluent: 100% petroleum ether (PE); Yellow Oil, 69% yield, 32.9 mg; <sup>1</sup>H NMR (400 MHz,  $\text{CDCl}_3$ )  $\delta$  8.05 (d,  $J$  = 8.4 Hz, 1H), 7.94 (d,  $J$  = 8.0 Hz, 1H), 7.65 (t,  $J$  = 7.6 Hz, 1H), 7.50 (t,  $J$  = 8.0 Hz, 1H), 7.32 (s, 1H), 2.69 (s, 3H), 2.35 (dd,  $J$  = 13.1, 7.9 Hz, 2H), 1.66 – 1.54 (m, 4H), 1.46 (s, 4H), 1.29 (s, 3H). <sup>13</sup>C NMR (101 MHz,  $\text{CDCl}_3$ )  $\delta$  168.2, 147.6, 143.5, 130.0, 128.5, 126.5, 125.3, 123.4, 119.3, 77.3, 77.0, 76.7, 41.3, 37.2, 26.4, 22.9, 19.4, 19.0. HRMS (ESI)  $m/z$  calcd for  $\text{C}_{17}\text{H}_{22}\text{N}^+$  [ $\text{M}+\text{H}$ ]<sup>+</sup>: 240.1747; found: 240.1745.

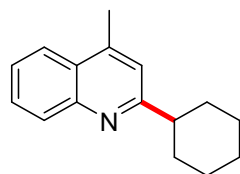

**2-cyclohexyl-4-methylquinoline (3b)**: Eluent: PE/EtOAc (50:1); Colorless oil, 43% yield, 19.5 mg; <sup>1</sup>H NMR (400 MHz,  $\text{CDCl}_3$ )  $\delta$  8.06 (d,  $J$  = 8.4 Hz, 1H), 7.95 (d,  $J$  = 8.3 Hz, 1H), 7.68 (t,  $J$  = 7.6 Hz, 1H),

7.50 (t,  $J = 7.6$  Hz, 1H), 7.18 (s, 1H), 2.94 – 2.84 (m, 1H), 2.70 (s, 3H), 2.03 (d,  $J = 12.0$  Hz, 2H), 1.91 (d,  $J = 12.8$  Hz, 2H), 1.81 (d,  $J = 12.7$  Hz, 1H), 1.70 – 1.57 (m, 2H), 1.55 – 1.30 (m, 3H).  $^{13}\text{C}$  NMR (101 MHz,  $\text{CDCl}_3$ )  $\delta$  166.5, 147.6, 144.3, 129.5, 129.0, 127.1, 125.4, 123.6, 120.3, 77.4, 77.1, 76.7, 47.6, 32.9, 26.6, 26.2, 18.9. **HRMS (ESI)**  $m/z$  calcd for  $\text{C}_{16}\text{H}_{20}\text{N}^+$   $[\text{M}+\text{H}]^+$ : 226.1590; found: 226.1587.

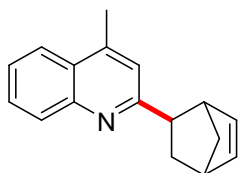

**2-(bicyclo[2.2.1]hept-5-en-2-yl)-4-methylquinoline (3c)**: Eluent: PE/EtOAc (100:1); Colorless oil, 82% yield, 38.6 mg;  $^1\text{H}$  NMR (400 MHz,  $\text{DMSO}-d_6$ )  $\delta$  8.01 (d,  $J = 8.2$  Hz, 1H), 7.91 (d,  $J = 8.3$  Hz, 1H), 7.68 (t,  $J = 7.6$  Hz, 1H), 7.53 (t,  $J = 7.5$  Hz, 1H), 7.35 (s, 1H), 6.29 (dd,  $J = 5.8, 3.0$  Hz, 1H), 6.23 (dd,  $J = 5.7, 2.8$  Hz, 1H), 2.98 (s, 2H), 2.88 (dd,  $J = 8.5, 4.3$  Hz, 1H), 2.64 (s, 3H), 2.34 (dt,  $J = 11.4, 3.9$  Hz, 1H), 1.76 (d,  $J = 8.0$  Hz, 1H), 1.45 (ddd,  $J = 11.2, 8.8, 2.2$  Hz, 1H), 1.24 (d,  $J = 7.9$  Hz, 1H).  $^{13}\text{C}$  NMR (101 MHz,  $\text{DMSO}-d_6$ )  $\delta$  164.6, 147.4, 144.2, 138.4, 137.3, 129.7, 129.5, 126.9, 126.0, 124.4, 123.1, 48.9, 46.5, 45.5, 42.1, 40.6, 40.4, 40.2, 40.0, 39.8, 39.6, 39.4, 31.3, 18.6. **HRMS (ESI)**  $m/z$  calcd for  $\text{C}_{17}\text{H}_{18}\text{N}^+$   $[\text{M}+\text{H}]^+$ : 236.1434; found: 236.1433.

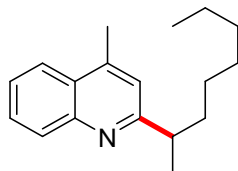

**4-methyl-2-(octan-2-yl)quinoline (3d)**: Eluent: PE/EtOAc (100:1); Yellow oil, 59% yield, 29.9 mg;  $^1\text{H}$  NMR (400 MHz,  $\text{CDCl}_3$ )  $\delta$  8.08 (d,  $J = 8.4$  Hz, 1H), 7.96 (d,  $J = 8.2$  Hz, 1H), 7.68 (t,  $J = 7.6$  Hz, 1H), 7.51 (t,  $J = 7.5$  Hz, 1H), 7.15 (s, 1H), 3.05 (q,  $J = 7.1$  Hz, 1H), 2.70 (s, 3H), 1.83 (tdd,  $J = 13.4, 9.0, 5.9$  Hz, 1H), 1.67 (dq,  $J = 19.1, 6.1$  Hz, 1H), 1.37 (d,  $J = 6.9$  Hz, 3H), 1.33 – 1.15 (m, 8H), 0.87 (t,  $J = 6.7$  Hz, 3H).  $^{13}\text{C}$  NMR (101 MHz,  $\text{CDCl}_3$ )  $\delta$  167.0, 147.6, 144.2, 129.6, 128.9, 127.0, 125.4, 123.6, 120.2, 77.4, 77.1, 76.7, 43.0, 37.1, 31.8, 29.5, 27.7, 22.6, 20.8, 18.9, 14.1. **HRMS (ESI)**  $m/z$  calcd for  $\text{C}_{18}\text{H}_{26}\text{N}^+$   $[\text{M}+\text{H}]^+$ : 256.2060; found: 256.2056.

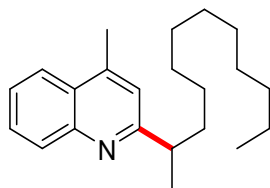

**2-(dodecan-2-yl)-4-methylquinoline (3e):** Eluent: PE/EtOAc (50:1); Colorless oil, 49% yield, 30.5 mg; <sup>1</sup>H NMR (400 MHz, CDCl<sub>3</sub>) δ 8.07 (d, *J* = 8.3 Hz, 1H), 7.96 (d, *J* = 8.3 Hz, 1H), 7.68 (t, *J* = 7.0 Hz, 1H), 7.51 (t, *J* = 7.6 Hz, 1H), 7.15 (s, 1H), 3.05 (q, *J* = 7.1 Hz, 1H), 2.70 (s, 3H), 1.82 (qd, *J* = 10.1, 9.1, 6.3 Hz, 1H), 1.67 (tt, *J* = 13.3, 6.0 Hz, 1H), 1.39 – 1.19 (m, 19H), 0.88 (t, *J* = 6.8 Hz, 3H). <sup>13</sup>C NMR (101 MHz, CDCl<sub>3</sub>) δ 167.0, 147.7, 144.1, 129.6, 128.9, 127.0, 125.3, 123.6, 120.2, 77.3, 77.0, 76.7, 43.0, 37.1, 31.9, 29.8, 29.6, 29.6, 29.6, 29.3, 27.7, 22.7, 20.8, 18.8, 14.1. **HRMS (ESI)** *m/z* calcd for C<sub>22</sub>H<sub>34</sub>N<sup>+</sup> [M+H]<sup>+</sup>: 312.2686; found: 312.2683.

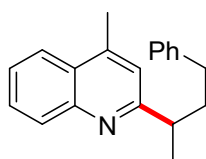

**4-methyl-2-(4-phenylbutan-2-yl)quinoline (3f):** Eluent: PE/EtOAc (20:1); Colorless oil, 45% yield, 24.9 mg; <sup>1</sup>H NMR (400 MHz, DMSO-*d*<sub>6</sub>) δ 8.04 (d, *J* = 8.1 Hz, 1H), 7.96 (d, *J* = 8.3 Hz, 1H), 7.70 (t, *J* = 7.6 Hz, 1H), 7.56 (t, *J* = 7.5 Hz, 1H), 7.32 (s, 1H), 7.25 (t, *J* = 7.5 Hz, 2H), 7.16 (t, *J* = 7.4 Hz, 3H), 3.01 (q, *J* = 7.0 Hz, 1H), 2.67 (s, 3H), 2.57 (ddd, *J* = 14.0, 10.0, 6.2 Hz, 1H), 2.45 (dq, *J* = 10.2, 5.7, 4.9 Hz, 1H), 2.12 (dddd, *J* = 13.6, 9.8, 6.0, 4.1 Hz, 1H), 1.91 (ddt, *J* = 12.9, 9.9, 6.3 Hz, 1H), 1.32 (d, *J* = 6.9 Hz, 3H). <sup>13</sup>C NMR (101 MHz, DMSO-*d*<sub>6</sub>) δ 166.2, 147.6, 144.8, 142.6, 129.6, 129.5, 128.7, 127.1, 126.1, 126.0, 124.5, 121.2, 41.8, 40.6, 40.4, 40.2, 40.0, 39.8, 39.6, 39.4, 38.5, 33.7, 21.1, 18.7. **HRMS (ESI)** *m/z* calcd for C<sub>20</sub>H<sub>22</sub>N<sup>+</sup> [M+H]<sup>+</sup>: 276.1747; found: 276.1745.

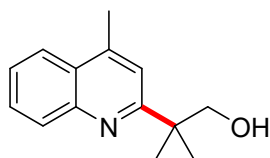

**2-methyl-2-(4-methylquinolin-2-yl)propan-1-ol (3g):** Eluent: PE/EtOAc (9:1); Colorless oil, 57% yield, 24.5 mg; <sup>1</sup>H NMR (400 MHz, DMSO-*d*<sub>6</sub>) δ 8.01 (d, *J* = 8.1 Hz, 1H), 7.92 (d, *J* = 8.3 Hz, 1H), 7.68 (t, *J* = 7.1 Hz, 1H), 7.54 (t, *J* = 7.2 Hz, 1H), 7.48 (s, 1H), 4.73 (t, *J* = 5.6 Hz, 1H), 3.65 (d, *J* = 5.6 Hz, 2H), 2.65 (s, 3H), 1.33 (s, 6H). <sup>13</sup>C NMR (101 MHz, DMSO-*d*<sub>6</sub>) δ 167.3, 147.0, 144.1, 129.7, 129.4, 126.7, 126.1, 124.3, 120.3, 70.8, 43.3, 40.6, 40.4, 40.2, 40.0, 39.8, 39.6, 39.4, 25.2, 18.9. **HRMS (ESI)** *m/z* calcd for C<sub>14</sub>H<sub>18</sub>NO<sup>+</sup> [M+H]<sup>+</sup>: 216.1383; found: 216.1382.

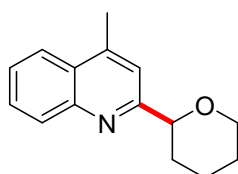

**4-methyl-2-(tetrahydro-2H-pyran-2-yl)quinoline (3h):** Eluent: PE/EtOAc (9:1); Colorless oil, 61% yield, 27.6 mg; <sup>1</sup>H NMR (400 MHz, DMSO-*d*<sub>6</sub>) δ 8.04 (d, *J* = 8.2 Hz, 1H), 7.93 (d, *J* = 8.3 Hz, 1H), 7.71 (t, *J* = 7.6 Hz, 1H), 7.57 (t, *J* = 7.6 Hz, 1H), 7.46 (s, 1H), 4.48 (dd, *J* = 11.0, 2.4 Hz, 1H), 4.06 (d, *J* = 11.1 Hz, 1H), 3.64 – 3.52 (m, 1H), 2.67 (s, 3H), 2.03 – 1.93 (m, 1H), 1.92 – 1.83 (m, 1H), 1.75 – 1.44 (m, 4H). <sup>13</sup>C NMR (101 MHz, DMSO-*d*<sub>6</sub>) δ 162.3, 147.1, 145.1, 129.7, 129.6, 127.5, 126.5, 124.6, 119.2, 80.9, 68.3, 40.6, 40.4, 40.2, 40.0, 39.8, 39.6, 39.4, 32.5, 26.0, 23.6, 18.8. **HRMS (ESI)** *m/z* calcd for C<sub>15</sub>H<sub>18</sub>NO<sup>+</sup> [M+H]<sup>+</sup>: 228.1383; found: 228.1380.

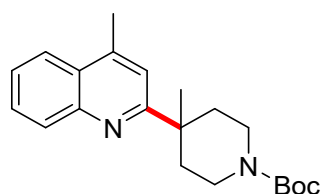

**tert-butyl 4-methyl-4-(4-methylquinolin-2-yl)piperidine-1-carboxylate (3i):** Eluent: PE/EtOAc (9:1); Colorless oil, 63% yield, 42.8 mg; <sup>1</sup>H NMR (400 MHz, CDCl<sub>3</sub>) δ 8.13 – 7.87 (m, 2H), 7.77 – 7.62 (m, 1H), 7.61 – 7.46 (m, 1H), 7.40 – 7.22 (m, 1H), 3.73 (s, 2H), 3.25 (s, 2H), 2.73 (d, *J* = 13.3 Hz, 3H), 2.49 (s, 2H), 1.74 (s, 2H), 1.48 (d, *J* = 12.9 Hz, 9H), 1.37 (d, *J* = 13.1 Hz, 3H). <sup>13</sup>C NMR (101 MHz, CDCl<sub>3</sub>) δ 166.0, 155.1, 147.4, 144.2, 130.0, 128.9, 126.6, 125.7, 123.5, 119.2, 79.2, 41.4, 39.8, 36.2, 29.1, 28.5, 19.1. **HRMS (ESI)** *m/z* calcd for C<sub>21</sub>H<sub>29</sub>N<sub>2</sub>O<sub>2</sub><sup>+</sup> [M+H]<sup>+</sup>: 341.2224; found: 341.2220.

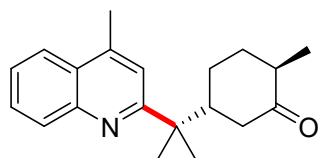

**(2*R*,5*S*)-2-methyl-5-(2-(4-methylquinolin-2-yl)propan-2-yl)cyclohexan-1-one (3j):** Eluent: PE/EtOAc (20:1); Colorless oil, 33% yield, 19.2 mg; <sup>1</sup>H NMR (400 MHz, DMSO-*d*<sub>6</sub>) δ 8.03 (d, *J* = 8.0 Hz, 1H), 7.93 (d, *J* = 8.2 Hz, 1H), 7.70 (t, *J* = 7.1 Hz, 1H), 7.57 (t, *J* = 7.2 Hz, 1H), 7.49 (s, 1H), 2.68 (s, 3H), 2.36 (dt, *J* = 12.7, 6.3 Hz, 1H), 2.29 – 2.15 (m, 2H), 1.98 (ddd, *J* = 12.5, 5.8, 3.0 Hz, 1H), 1.89 (d, *J* = 11.5 Hz, 1H), 1.63 – 1.46 (m, 2H), 1.37 (d, *J* = 12.7 Hz, 6H), 1.22 – 1.11 (m, 1H), 0.84 (d, *J* = 6.5 Hz, 3H). <sup>13</sup>C NMR (101 MHz, DMSO-*d*<sub>6</sub>) δ 212.6, 167.5, 146.9, 144.4, 129.9, 129.5, 126.6, 126.2, 124.3, 119.9, 49.2, 44.2, 43.8, 43.7, 40.6, 40.4, 40.2, 40.0, 39.8, 39.6, 39.4, 34.7, 26.7, 24.8, 24.0, 18.9, 14.8. **HRMS (ESI)** *m/z* calcd for C<sub>20</sub>H<sub>26</sub>NO<sup>+</sup> [M+H]<sup>+</sup>: 296.2009; found: 296.2007.

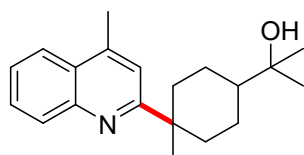

**2-(4-methyl-4-(4-methylquinolin-2-yl)cyclohexyl)propan-2-ol (3k):** Eluent: PE/EtOAc (9:1); Yellow oil, 46% yield, 27.3 mg; **<sup>1</sup>H NMR** (400 MHz, DMSO-*d*<sub>6</sub>) δ 8.01 (d, *J* = 8.2 Hz, 1H), 7.93 (d, *J* = 8.4 Hz, 1H), 7.69 (t, *J* = 7.6 Hz, 1H), 7.55 (d, *J* = 7.1 Hz, 1H), 7.51 (d, *J* = 6.4 Hz, 1H), 4.07 (s, 1H), 2.66 (s, 3H), 1.94 (d, *J* = 12.6 Hz, 2H), 1.77 (t, *J* = 11.7 Hz, 4H), 1.33 (d, *J* = 9.8 Hz, 5H), 1.22 (dd, *J* = 13.2, 9.5 Hz, 1H), 1.09 (s, 6H). **<sup>13</sup>C NMR** (101 MHz, DMSO-*d*<sub>6</sub>) δ 169.9, 147.0, 144.3, 129.8, 129.3, 126.7, 126.0, 124.3, 119.4, 71.1, 48.9, 40.6, 40.4, 40.2, 40.0, 39.8, 39.6, 39.4, 36.9, 27.6, 23.1, 23.0, 18.9. **HRMS (ESI)** *m/z* calcd for C<sub>20</sub>H<sub>28</sub>NO<sup>+</sup> [M+H]<sup>+</sup>: 298.2165; found: 298.2162.

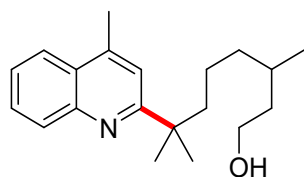

**3,7-dimethyl-7-(4-methylquinolin-2-yl)octan-1-ol (3l):** Eluent: PE/EtOAc (9:1); Colorless oil, 65% yield, 38.7 mg; **<sup>1</sup>H NMR** (400 MHz, CDCl<sub>3</sub>) δ 8.07 (d, *J* = 8.4 Hz, 1H), 7.94 (d, *J* = 8.2 Hz, 1H), 7.65 (t, *J* = 7.6 Hz, 1H), 7.49 (t, *J* = 7.5 Hz, 1H), 7.29 (s, 1H), 3.60 (qd, *J* = 10.4, 9.9, 3.6 Hz, 2H), 2.68 (s, 3H), 1.80 – 1.73 (m, 2H), 1.54 – 1.40 (m, 8H), 1.33 – 1.03 (m, 6H), 0.79 (d, *J* = 6.4 Hz, 3H). **<sup>13</sup>C NMR** (101 MHz, CDCl<sub>3</sub>) δ 168.2, 147.3, 143.6, 129.9, 128.7, 126.5, 125.4, 123.4, 119.3, 77.4, 77.1, 76.8, 61.1, 43.5, 41.0, 39.8, 37.8, 29.2, 27.9, 22.1, 19.6, 19.1. **HRMS (ESI)** *m/z* calcd for C<sub>20</sub>H<sub>30</sub>NO<sup>+</sup> [M+H]<sup>+</sup>: 300.2322; found: 300.2321.

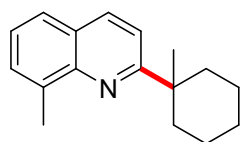

**8-methyl-2-(1-methylcyclohexyl)quinoline (3m):** Eluent: PE/EtOAc (100:1); Colorless oil, 50% yield, 23.8 mg; **<sup>1</sup>H NMR** (400 MHz, CDCl<sub>3</sub>) δ 8.04 (d, *J* = 8.7 Hz, 1H), 7.61 (d, *J* = 8.1 Hz, 1H), 7.50 (dd, *J* = 16.5, 7.8 Hz, 2H), 7.36 (t, *J* = 7.5 Hz, 1H), 2.81 (s, 3H), 2.49 – 2.37 (m, 2H), 1.66 – 1.54 (m, 4H), 1.53 – 1.41 (m, 4H), 1.29 (s, 3H). **<sup>13</sup>C NMR** (101 MHz, CDCl<sub>3</sub>) δ 166.9, 146.4, 137.5, 136.0, 128.9, 126.1, 125.3, 125.1, 118.4, 77.4, 77.0, 76.7, 41.8, 37.4, 30.0, 26.5, 23.0, 17.8. **HRMS (ESI)** *m/z* calcd for C<sub>17</sub>H<sub>22</sub>N<sup>+</sup> [M+H]<sup>+</sup>: 240.1747; found: 240.1745.

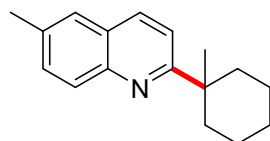



**6-methyl-2-(1-methylcyclohexyl)quinoline (3n):** Eluent: PE/EtOAc (50:1); Yellow oil, 66% yield, 31.6 mg; <sup>1</sup>H NMR (400 MHz, CDCl<sub>3</sub>) δ 7.98 (dd, *J* = 11.2, 8.9 Hz, 2H), 7.58 – 7.41 (m, 3H), 2.54 (s, 3H), 2.37 (dd, *J* = 11.9, 6.4 Hz, 2H), 1.73 – 1.58 (m, 4H), 1.48 (s, 4H), 1.32 (s, 3H). <sup>13</sup>C NMR (101 MHz, CDCl<sub>3</sub>) δ 167.6, 146.3, 135.3, 135.2, 131.1, 129.1, 126.3, 126.1, 118.7, 77.4, 77.1, 76.7, 41.4, 37.3, 29.2, 26.4, 22.9, 21.5. **HRMS (ESI)** *m/z* calcd for C<sub>17</sub>H<sub>22</sub>N<sup>+</sup> [M+H]<sup>+</sup>: 240.1747; found: 240.1743.

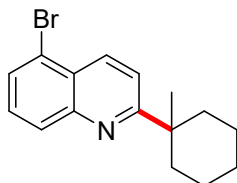

**5-bromo-2-(1-methylcyclohexyl)quinoline (3o):** Eluent: PE/EtOAc (50:1); Colorless oil, 43% yield, 26.0 mg; <sup>1</sup>H NMR (400 MHz, CDCl<sub>3</sub>) δ 8.43 (d, *J* = 8.9 Hz, 1H), 8.02 (d, *J* = 8.5 Hz, 1H), 7.74 (d, *J* = 7.5 Hz, 1H), 7.59 (d, *J* = 8.9 Hz, 1H), 7.51 (t, *J* = 8.0 Hz, 1H), 2.36 (dd, *J* = 12.2, 6.9 Hz, 2H), 1.63 (d, *J* = 12.6 Hz, 4H), 1.45 (s, 4H), 1.30 (s, 3H). <sup>13</sup>C NMR (101 MHz, CDCl<sub>3</sub>) δ 169.4, 148.5, 135.3, 129.4, 129.3, 129.1, 125.8, 121.6, 120.0, 77.4, 77.0, 76.7, 41.5, 37.1, 29.3, 26.3, 22.9. **HRMS (ESI)** *m/z* calcd for C<sub>16</sub>H<sub>19</sub>BrN<sup>+</sup> [M+H]<sup>+</sup>: 304.0695; found: 304.0693.

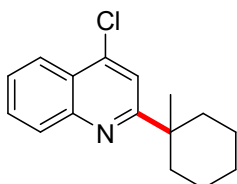

**4-chloro-2-(1-methylcyclohexyl)quinoline (3p):** Eluent: PE/EtOAc (100:1); Colorless oil, 53% yield, 27.3 mg; <sup>1</sup>H NMR (400 MHz, CDCl<sub>3</sub>) δ 8.19 (d, *J* = 8.3 Hz, 1H), 8.09 (d, *J* = 8.4 Hz, 1H), 7.73 (t, *J* = 7.6 Hz, 1H), 7.59 (d, *J* = 4.4 Hz, 2H), 2.35 (dd, *J* = 12.3, 6.3 Hz, 3H), 1.70 – 1.58 (m, 8H), 1.48 (s, 4H), 1.32 (s, 3H). <sup>13</sup>C NMR (101 MHz, CDCl<sub>3</sub>) δ 168.7, 148.6, 142.4, 129.8, 129.8, 126.6, 124.6, 123.7, 119.0, 77.3, 77.0, 76.7, 41.7, 37.1, 29.2, 26.2, 22.9. **HRMS (ESI)** *m/z* calcd for C<sub>16</sub>H<sub>19</sub>ClN<sup>+</sup> [M+H]<sup>+</sup>: 260.1201; found: 260.1200.

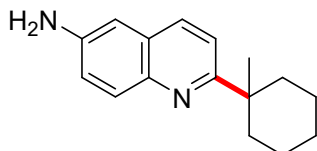

**2-(1-methylcyclohexyl)quinolin-6-amine (3q):** Eluent: PE/EtOAc (4:1); Brown oil, 43% yield, 20.8 mg; <sup>1</sup>H NMR (400 MHz, DMSO-*d*<sub>6</sub>) δ 7.84 (d, *J* = 8.7 Hz, 1H), 7.60 (d, *J* = 8.9 Hz, 1H), 7.36 (d, *J* = 8.7 Hz, 1H), 7.08 (d, *J* = 11.1 Hz, 1H), 6.74 (s, 1H), 5.43 (s, 2H), 2.24 (d, *J* = 8.6 Hz, 2H), 1.58 – 1.40 (m,

4H), 1.41 – 1.29 (m, 4H), 1.17 (s, 3H).  $^{13}\text{C}$  NMR (101 MHz, DMSO- $d_6$ )  $\delta$  162.6, 146.9, 141.5, 133.9, 129.9, 128.2, 121.6, 118.9, 105.3, 41.0, 40.6, 40.4, 40.2, 40.0, 39.7, 39.6, 39.3, 37.2, 29.9, 26.3, 23.0.

**HRMS (ESI)**  $m/z$  calcd for  $\text{C}_{16}\text{H}_{21}\text{N}_2^+$   $[\text{M}+\text{H}]^+$ : 241.1699; found: 241.1697.

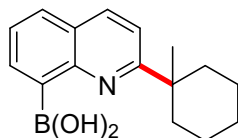

**(2-(1-methylcyclohexyl)quinolin-8-yl)boronic acid (3r)**: Eluent: PE/EtOAc (4:1); Yellow oil, 44% yield, 23.5 mg;  $^1\text{H}$  NMR (400 MHz,  $\text{CDCl}_3$ )  $\delta$  8.91 (s, 2H), 8.39 (d,  $J = 6.9$  Hz, 1H), 8.21 (d,  $J = 8.6$  Hz, 1H), 7.92 (d,  $J = 8.1$  Hz, 1H), 7.59 (t,  $J = 8.7$  Hz, 2H), 2.29 (dd,  $J = 11.3, 6.8$  Hz, 2H), 1.82 – 1.65 (m, 4H), 1.52 (d,  $J = 7.9$  Hz, 4H), 1.35 (s, 3H).  $^{13}\text{C}$  NMR (101 MHz,  $\text{CDCl}_3$ )  $\delta$  171.4, 167.9, 151.2, 137.9, 137.8, 130.4, 126.1, 125.9, 118.7, 77.4, 77.0, 76.7, 41.7, 37.3, 29.2, 26.2, 22.8. **HRMS (ESI)**  $m/z$  calcd for  $\text{C}_{16}\text{H}_{21}\text{BNO}_2^+$   $[\text{M}+\text{H}]^+$ : 270.1660; found: 270.1656.

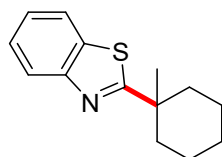

**2-(1-methylcyclohexyl)benzo[d]thiazole (3s)**: Eluent: PE/EtOAc (100:1); Colorless oil, 43% yield, 19.8 mg;  $^1\text{H}$  NMR (400 MHz,  $\text{CDCl}_3$ )  $\delta$  8.00 (d,  $J = 8.1$  Hz, 1H), 7.86 (d,  $J = 7.9$  Hz, 1H), 7.44 (t,  $J = 7.7$  Hz, 1H), 7.33 (t,  $J = 7.6$  Hz, 1H), 2.31 – 2.14 (m, 2H), 1.74 – 1.47 (m, 8H), 1.41 (s, 3H).  $^{13}\text{C}$  NMR (101 MHz,  $\text{CDCl}_3$ )  $\delta$  181.7, 153.3, 134.9, 125.6, 124.5, 122.7, 121.5, 77.4, 77.0, 76.7, 42.1, 38.5, 29.8, 25.8, 22.7. **HRMS (ESI)**  $m/z$  calcd for  $\text{C}_{14}\text{H}_{18}\text{NS}^+$   $[\text{M}+\text{H}]^+$ : 232.1154; found: 232.1151.

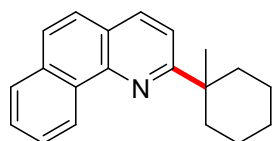

**2-(1-methylcyclohexyl)benzo[h]quinoline (3t)**: Eluent: 100% petroleum ether (PE); Colorless oil, 58% yield, 31.8 mg;  $^1\text{H}$  NMR (400 MHz,  $\text{CDCl}_3$ )  $\delta$  9.42 (d,  $J = 8.0$  Hz, 1H), 8.12 (d,  $J = 8.4$  Hz, 1H), 7.92 (d,  $J = 7.7$  Hz, 1H), 7.81 – 7.66 (m, 4H), 7.62 (d,  $J = 8.4$  Hz, 1H), 2.54 (dd,  $J = 10.9, 6.3$  Hz, 2H), 1.79 – 1.64 (m, 4H), 1.61 – 1.47 (m, 4H), 1.39 (s, 3H).  $^{13}\text{C}$  NMR (101 MHz,  $\text{CDCl}_3$ )  $\delta$  167.2, 145.3, 135.8, 133.7, 132.0, 127.7, 127.6, 126.7, 126.6, 125.1, 124.7, 123.9, 119.0, 77.4, 77.1, 76.7, 41.8, 37.5, 30.1, 26.5, 23.0. **HRMS (ESI)**  $m/z$  calcd for  $\text{C}_{20}\text{H}_{22}\text{N}^+$   $[\text{M}+\text{H}]^+$ : 276.1747; found: 276.1743.

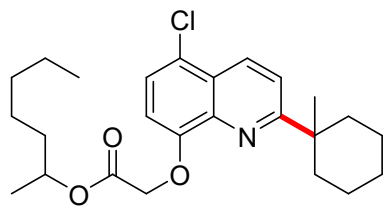

**heptan-2-yl 2-((5-chloro-2-(1-methylcyclohexyl)quinolin-8-yl)oxy)acetate (3u):** Eluent: PE/EtOAc (50:1); Colorless oil, 63% yield, 54.1 mg;  $^1\text{H NMR}$  (400 MHz,  $\text{DMSO-}d_6$ )  $\delta$  8.40 (d,  $J = 9.0$  Hz, 1H), 7.79 (d,  $J = 9.0$  Hz, 1H), 7.56 (d,  $J = 8.4$  Hz, 1H), 7.09 (d,  $J = 8.4$  Hz, 1H), 5.15 – 4.99 (m, 2H), 4.86 (q,  $J = 6.2$  Hz, 1H), 2.28 (s, 2H), 1.60 – 1.48 (m, 4H), 1.44 – 1.29 (m, 6H), 1.23 – 1.07 (m, 12H), 0.76 (t,  $J = 6.5$  Hz, 3H).  $^{13}\text{C NMR}$  (101 MHz,  $\text{DMSO-}d_6$ )  $\delta$  168.8, 168.1, 153.1, 140.0, 133.2, 126.1, 125.0, 122.4, 120.9, 112.6, 71.9, 67.0, 41.9, 40.6, 40.4, 40.2, 39.9, 39.7, 39.5, 39.3, 37.0, 35.6, 31.5, 29.5, 26.2, 24.7, 22.8, 22.4, 20.2, 14.3. **HRMS (ESI)**  $m/z$  calcd for  $\text{C}_{25}\text{H}_{35}\text{ClNO}_3^+$   $[\text{M}+\text{H}]^+$ : 432.2300; found: 432.2298.

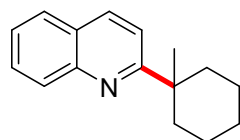

**2-(1-methylcyclohexyl)quinoline (4a):** Eluent: PE/EtOAc (100:1); Yellow oil, 39% yield, 17.4 mg;  $^1\text{H NMR}$  (400 MHz,  $\text{CDCl}_3$ )  $\delta$  8.13 – 8.01 (m, 2H), 7.77 (d,  $J = 8.0$  Hz, 1H), 7.70 – 7.63 (m, 1H), 7.55 – 7.42 (m, 2H), 2.37 (dd,  $J = 12.0, 6.5$  Hz, 2H), 1.69 – 1.57 (m, 4H), 1.46 (s, 4H), 1.30 (s, 3H).  $^{13}\text{C NMR}$  (101 MHz,  $\text{CDCl}_3$ )  $\delta$  168.6, 147.7, 135.8, 129.4, 128.9, 127.2, 126.3, 125.6, 118.7, 77.4, 77.0, 76.7, 41.6, 37.2, 29.2, 26.4, 22.9. **HRMS (ESI)**  $m/z$  calcd for  $\text{C}_{16}\text{H}_{20}\text{N}^+$   $[\text{M}+\text{H}]^+$ : 226.1590; found: 226.1589.

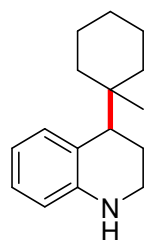

**4-(1-methylcyclohexyl)-1,2,3,4-tetrahydroquinoline (4b):** Eluent: PE/EtOAc (100:1); Yellow oil, 30% yield, 13.6 mg;  $^1\text{H NMR}$  (400 MHz,  $\text{DMSO-}d_6$ )  $\delta$  6.83 (t,  $J = 7.5$  Hz, 1H), 6.75 (d,  $J = 7.3$  Hz, 1H), 6.41 (d,  $J = 7.9$  Hz, 1H), 6.33 (t,  $J = 7.2$  Hz, 1H), 5.60 (d,  $J = 3.5$  Hz, 1H), 3.21 (ddt,  $J = 16.5, 12.2, 4.9$  Hz, 2H), 2.50 (d,  $J = 11.0$  Hz, 2H), 2.08 (d,  $J = 13.7$  Hz, 1H), 1.57 – 1.24 (m, 10H), 0.69 (s, 3H).  $^{13}\text{C NMR}$  (101 MHz,  $\text{DMSO-}d_6$ )  $\delta$  146.0, 130.9, 127.1, 120.8, 113.8, 113.2, 40.6, 40.3, 40.1, 39.9, 39.7, 39.5, 39.3, 38.9, 37.4, 37.0, 35.8, 26.4, 22.6, 22.2, 21.8. **HRMS (ESI)**  $m/z$  calcd for  $\text{C}_{16}\text{H}_{24}\text{N}^+$   $[\text{M}+\text{H}]^+$ : 230.1903; found: 230.1900.

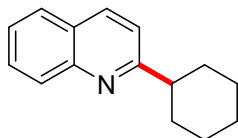

**2-cyclohexylquinoline (5a-C2):** Eluent: PE/EtOAc (100:1); Yellow oil, 46% yield, 19.3 mg; **<sup>1</sup>H NMR** (400 MHz, CDCl<sub>3</sub>) δ 8.06 (t, *J* = 8.4 Hz, 2H), 7.76 (d, *J* = 8.1 Hz, 1H), 7.67 (t, *J* = 7.6 Hz, 1H), 7.46 (t, *J* = 7.5 Hz, 1H), 7.32 (d, *J* = 8.5 Hz, 1H), 2.92 (tt, *J* = 12.0, 3.3 Hz, 1H), 2.02 (d, *J* = 11.9 Hz, 2H), 1.89 (d, *J* = 12.8 Hz, 2H), 1.79 (d, *J* = 12.5 Hz, 1H), 1.63 (qd, *J* = 12.4, 2.6 Hz, 2H), 1.47 (qd, *J* = 12.7, 2.9 Hz, 2H), 1.33 (qt, *J* = 12.8, 3.1 Hz, 1H). **<sup>13</sup>C NMR** (101 MHz, CDCl<sub>3</sub>) δ 166.9, 147.8, 136.3, 129.3, 129.0, 127.5, 127.0, 125.6, 119.6, 77.4, 77.1, 76.8, 47.7, 32.9, 26.6, 26.1. **HRMS (ESI)** *m/z* calcd for C<sub>15</sub>H<sub>18</sub>N<sup>+</sup> [M+H]<sup>+</sup>: 212.1434; found: 212.1430.

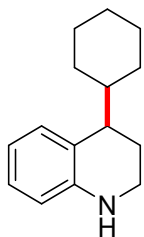

**4-cyclohexyl-1,2,3,4-tetrahydroquinoline (5a):** Eluent: PE/EtOAc (100:1); Yellow oil, 29% yield, 12.5 mg; **<sup>1</sup>H NMR** (400 MHz, DMSO-*d*<sub>6</sub>) δ 6.85 – 6.70 (m, 2H), 6.48 – 6.24 (m, 2H), 5.59 (s, 1H), 3.18 – 3.06 (m, 2H), 2.37 (dt, *J* = 8.3, 4.6 Hz, 1H), 1.93 – 1.79 (m, 1H), 1.76 – 1.47 (m, 6H), 1.47 – 1.33 (m, 1H), 1.21 – 0.73 (m, 5H). **<sup>13</sup>C NMR** (101 MHz, DMSO-*d*<sub>6</sub>) δ 145.3, 129.7, 126.9, 122.6, 114.5, 113.7, 41.5, 40.6, 40.4, 40.2, 40.0, 39.8, 39.5, 39.3, 38.1, 31.8, 29.3, 26.7, 26.7, 26.6, 23.0. **HRMS (ESI)** *m/z* calcd for C<sub>15</sub>H<sub>22</sub>N<sup>+</sup> [M+H]<sup>+</sup>: 216.1747; found: 216.1745.

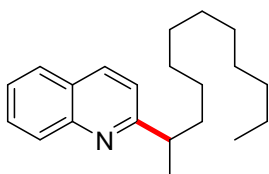

**2-(dodecan-2-yl)quinoline (5b-C2):** Eluent: PE/EtOAc (50:1); Yellow oil, 33% yield, 19.9 mg; **<sup>1</sup>H NMR** (400 MHz, CDCl<sub>3</sub>) δ 8.10 – 8.02 (m, 2H), 7.77 (d, *J* = 8.0 Hz, 1H), 7.67 (t, *J* = 7.7 Hz, 1H), 7.47 (t, *J* = 7.4 Hz, 1H), 7.30 (d, *J* = 8.6 Hz, 1H), 3.08 (h, *J* = 7.0 Hz, 1H), 1.88 – 1.73 (m, 1H), 1.72 – 1.60 (m, 1H), 1.36 (d, *J* = 6.9 Hz, 4H), 1.24 (d, *J* = 16.7 Hz, 15H), 0.86 (t, *J* = 6.8 Hz, 3H). **<sup>13</sup>C NMR** (101 MHz, CDCl<sub>3</sub>) δ 167.3, 147.8, 136.3, 129.2, 129.0, 127.5, 127.0, 125.6, 119.6, 77.4, 77.1, 76.7, 43.1, 37.2,

31.9, 29.8, 29.6, 29.6, 29.4, 27.7, 22.7, 20.9, 14.2. **HRMS (ESI)**  $m/z$  calcd for  $C_{21}H_{32}N^+$   $[M+H]^+$ : 298.2529; found: 298.2528.

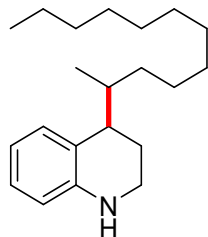

**4-(dodecan-2-yl)-1,2,3,4-tetrahydroquinoline (5b)**: Eluent: PE/EtOAc (50:1); Yellow oil, 34% yield, 20.3 mg;  $^1H$  NMR (400 MHz,  $DMSO-d_6$ )  $\delta$  6.83 (dd,  $J = 27.3, 7.5$  Hz, 2H), 6.39 (t,  $J = 7.1$  Hz, 2H), 5.54 (s, 1H), 3.12 (d,  $J = 6.9$  Hz, 2H), 2.58 (d,  $J = 6.2$  Hz, 1H), 1.84 (s, 1H), 1.65 (dq,  $J = 17.3, 6.0, 5.2$  Hz, 2H), 1.34 (s, 1H), 1.22 (s, 17H), 0.83 (t,  $J = 6.7$  Hz, 3H), 0.70 (d,  $J = 6.7$  Hz, 3H).  $^{13}C$  NMR (101 MHz,  $DMSO-d_6$ )  $\delta$  146.2, 128.4, 126.6, 123.3, 115.2, 114.0, 40.6, 40.4, 40.2, 40.0, 39.8, 39.6, 39.3, 35.1, 34.8, 31.8, 29.8, 29.5, 29.5, 29.2, 27.4, 22.6, 22.5, 15.7, 14.4. **HRMS (ESI)**  $m/z$  calcd for  $C_{21}H_{36}N^+$   $[M+H]^+$ : 302.2842; found: 302.2840.

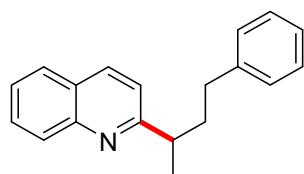

**2-(4-phenylbutan-2-yl)quinoline (5c-C2)**: Eluent: PE/EtOAc (9:1); Colorless oil, 49% yield, 25.6 mg;  $^1H$  NMR (400 MHz,  $CDCl_3$ )  $\delta$  8.13 – 8.07 (m, 2H), 7.79 (d,  $J = 8.0$  Hz, 1H), 7.73 – 7.67 (m, 1H), 7.50 (t,  $J = 7.5$  Hz, 1H), 7.32 (d,  $J = 8.5$  Hz, 1H), 7.26 (t,  $J = 7.5$  Hz, 2H), 7.17 (t,  $J = 6.1$  Hz, 3H), 3.17 (h,  $J = 6.9$  Hz, 1H), 2.66 (m,  $J = 13.7, 10.4, 6.1$  Hz, 1H), 2.54 (m,  $J = 10.5, 5.4$  Hz, 1H), 2.21 (m,  $J = 10.4, 8.2, 5.5$  Hz, 1H), 2.02 (m,  $J = 13.2, 10.5, 6.3$  Hz, 1H), 1.42 (d,  $J = 7.0$  Hz, 3H).  $^{13}C$  NMR (101 MHz,  $CDCl_3$ )  $\delta$  166.6, 147.9, 142.5, 136.5, 129.3, 129.1, 128.4, 128.3, 127.5, 127.0, 125.8, 125.7, 119.7, 77.4, 77.1, 76.8, 42.6, 38.8, 34.0, 21.0. **HRMS (ESI)**  $m/z$  calcd for  $C_{19}H_{20}N^+$   $[M+H]^+$ : 262.1590; found: 262.1587.

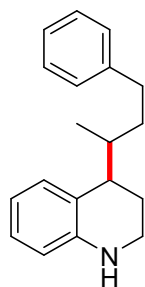

**4-(4-phenylbutan-2-yl)-1,2,3,4-tetrahydroquinoline (5c):** Eluent: PE/EtOAc (9:1); Colorless oil, 25% yield, 13.3 mg; <sup>1</sup>H NMR (400 MHz, DMSO-*d*<sub>6</sub>) δ 7.30 – 7.20 (m, 2H), 7.15 (d, *J* = 6.4 Hz, 3H), 6.86 – 6.75 (m, 2H), 6.39 (dd, *J* = 11.6, 7.7 Hz, 2H), 5.55 (s, 1H), 3.19 – 3.06 (m, 2H), 2.65 (dq, *J* = 12.3, 6.1, 5.7 Hz, 2H), 2.52 (d, *J* = 6.7 Hz, 1H), 1.91 (dt, *J* = 12.2, 6.7 Hz, 1H), 1.68 (ddq, *J* = 17.3, 11.3, 6.7, 6.2 Hz, 3H), 1.57 – 1.41 (m, 1H), 0.78 (d, *J* = 6.7 Hz, 3H). <sup>13</sup>C NMR (101 MHz, CDCl<sub>3</sub>) δ 145.2, 142.8, 128.4, 128.3, 128.3, 126.6, 125.7, 124.5, 117.1 114.4, 77.3, 77.0, 76.7, 40.6 39.6, 36.9, 35.1, 34.1 22.6 15.1. **HRMS (ESI)** *m/z* calcd for C<sub>19</sub>H<sub>24</sub>N<sup>+</sup> [M+H]<sup>+</sup>: 266.1903; found: 266.1902.

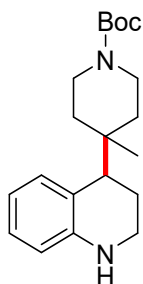

**tert-butyl 4-methyl-4-(1,2,3,4-tetrahydroquinolin-4-yl)piperidine-1-carboxylate (5d):** Eluent: PE/EtOAc (9:1); Yellow solid, 73% yield, 48.0 mg, m.p. 115.1-116.6 °C; <sup>1</sup>H NMR (400 MHz, DMSO-*d*<sub>6</sub>) δ 6.89 – 6.81 (m, 1H), 6.76 (d, *J* = 7.4 Hz, 1H), 6.42 (d, *J* = 7.6 Hz, 1H), 6.33 (t, *J* = 7.4 Hz, 1H), 5.63 (d, *J* = 4.4 Hz, 1H), 3.63 (d, *J* = 13.3 Hz, 2H), 3.20 (ddt, *J* = 25.1, 12.3, 5.6 Hz, 2H), 2.93 (s, 1H), 2.45 (d, *J* = 6.9 Hz, 1H), 2.08 (d, *J* = 13.8 Hz, 1H), 1.56 – 1.10 (m, 15H), 0.78 (s, 3H). <sup>13</sup>C NMR (101 MHz, DMSO-*d*<sub>6</sub>) δ 154.4, 146.1, 131.1, 127.4, 120.1, 113.9, 113.3, 78.8, 60.2, 45.0, 40.6, 40.4, 40.1, 39.9, 39.7, 39.5, 39.3, 38.8, 35.9, 28.6, 22.5, 20.2, 14.6. **HRMS (ESI)** *m/z* calcd for C<sub>20</sub>H<sub>31</sub>N<sub>2</sub>O<sub>2</sub><sup>+</sup> [M+H]<sup>+</sup>: 331.2380; found: 331.2378.

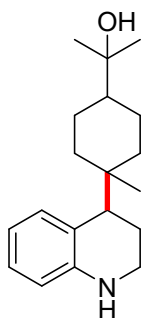

**2-(4-methyl-4-(1,2,3,4-tetrahydroquinolin-4-yl)cyclohexyl)propan-2-ol (5e):** Eluent: PE/EtOAc (9:1); Yellow solid, 38% yield, 21.7 mg, m.p. 103.9-104.6 °C; <sup>1</sup>H NMR (400 MHz, DMSO-*d*<sub>6</sub>) δ 6.83 (t, *J* = 7.5 Hz, 1H), 6.78 (d, *J* = 7.3 Hz, 1H), 6.40 (d, *J* = 8.0 Hz, 1H), 6.32 (t, *J* = 7.2 Hz, 1H), 5.67 – 5.52 (m, 1H), 3.94 (s, 1H), 3.26 – 3.17 (m, 2H), 2.33 – 2.26 (m, 1H), 2.13 (d, *J* = 13.7 Hz, 1H), 1.51 (dq, *J* = 30.9, 10.2, 5.8 Hz, 5H), 1.34 – 1.02 (m, 5H), 0.97 (s, 6H), 0.73 (s, 3H). <sup>13</sup>C NMR (101 MHz, DMSO-*d*<sub>6</sub>)

$\delta$  146.0, 131.2, 127.2, 120.8, 113.8, 113.3, 71.0, 49.1, 47.7, 40.6, 40.4, 40.2, 40.0, 39.8, 39.6, 39.4, 37.3, 37.0, 36.2, 27.6, 23.3, 22.7, 20.0. **HRMS (ESI)**  $m/z$  calcd for  $C_{19}H_{30}NO^+$   $[M+H]^+$ : 288.2322; found: 288.2320.

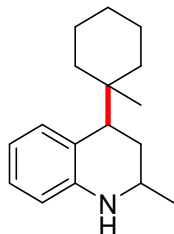

**2-methyl-4-(1-methylcyclohexyl)-1,2,3,4-tetrahydroquinoline (5f):** Eluent: PE/EtOAc (100:1); Yellow solid, 45% yield, 21.7 mg, m.p. 49.4-51.0 °C;  $^1H$  NMR (400 MHz,  $CDCl_3$ )  $\delta$  7.13 (d,  $J = 7.6$  Hz, 1H), 6.99 (t,  $J = 7.5$  Hz, 1H), 6.69 (t,  $J = 7.4$  Hz, 1H), 6.58 (d,  $J = 7.8$  Hz, 1H), 3.05 – 2.85 (m, 2H), 2.01 (ddd,  $J = 13.1, 10.0, 3.0$  Hz, 1H), 1.64 (dq,  $J = 12.6, 7.9$  Hz, 2H), 1.40 (ddd,  $J = 41.0, 20.5, 9.0$  Hz, 10H), 1.21 (d,  $J = 6.1$  Hz, 3H), 0.68 (s, 3H).  $^{13}C$  NMR (101 MHz,  $CDCl_3$ )  $\delta$  149.9, 131.2, 126.3, 126.0, 117.7, 115.4, 77.4, 77.0, 76.7, 49.9, 38.5, 37.0, 36.3, 35.7, 26.4, 22.4, 22.2, 19.6. **HRMS (ESI)**  $m/z$  calcd for  $C_{17}H_{26}N^+$   $[M+H]^+$ : 244.2060; found: 244.2057.

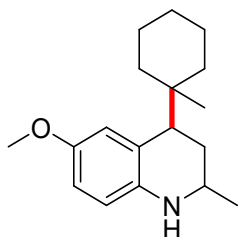

**6-methoxy-2-methyl-4-(1-methylcyclohexyl)-1,2,3,4-tetrahydroquinoline (5g):** Eluent: PE/EtOAc (4:1); Yellow oil, 47% yield, 25.5 mg;  $^1H$  NMR (400 MHz,  $DMSO-d_6$ )  $\delta$  7.09 (d,  $J = 8.5$  Hz, 1H), 6.77 (dd,  $J = 8.5, 2.8$  Hz, 1H), 6.64 (d,  $J = 2.9$  Hz, 1H), 5.23 (d,  $J = 4.8$  Hz, 1H), 3.98 (d,  $J = 4.9$  Hz, 1H), 3.72 (s, 3H), 2.54 (s, 1H), 2.49 (s, 1H), 2.14 (s, 3H), 1.53 – 0.91 (m, 11H), 0.59 (s, 3H).  $^{13}C$  NMR (101 MHz,  $DMSO-d_6$ )  $\delta$  167.4, 157.0, 138.4, 127.7, 126.9, 118.1, 111.9, 63.4, 55.6, 40.6, 40.4, 40.1, 39.9, 39.7, 39.5, 39.3, 36.1, 36.0, 35.3, 26.2, 25.4, 21.9, 21.8. **HRMS (ESI)**  $m/z$  calcd for  $C_{18}H_{28}NO^+$   $[M+H]^+$ : 274.2165; found: 274.2161.

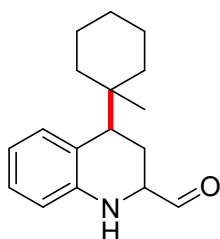

**4-(1-methylcyclohexyl)-1,2,3,4-tetrahydroquinoline-2-carbaldehyde (5h):** Eluent: PE/EtOAc (100:1); Yellow solid, 47% yield, 24.3 mg, m.p. 141.2-142.1 °C; <sup>1</sup>H NMR (400 MHz, CDCl<sub>3</sub>) δ 9.33 (s, 1H), 7.16 (t, *J* = 7.6 Hz, 1H), 7.04 (d, *J* = 7.4 Hz, 1H), 6.93 (t, *J* = 7.4 Hz, 1H), 6.77 (d, *J* = 7.9 Hz, 1H), 6.40 (s, 1H), 5.83 – 5.63 (m, 1H), 3.55 (d, *J* = 6.2 Hz, 1H), 1.68 – 1.49 (m, 4H), 1.42 (dq, *J* = 25.2, 15.9, 13.0 Hz, 6H), 1.30 – 1.08 (m, 2H), 0.76 (s, 3H). <sup>13</sup>C NMR (101 MHz, CDCl<sub>3</sub>) δ 186.3, 140.3, 130.7, 127.2, 121.1, 119.4, 114.6, 77.4, 77.0, 76.7, 48.7, 42.2, 34.9, 34.4, 26.4, 22.0, 21.9, 19.7. **HRMS (ESI)** *m/z* calcd for C<sub>17</sub>H<sub>24</sub>NO<sup>+</sup> [M+H]<sup>+</sup>: 258.1852; found: 258.1850.

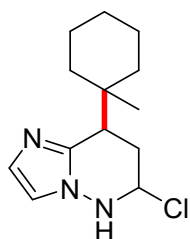

**6-chloro-8-(1-methylcyclohexyl)-5,6,7,8-tetrahydroimidazo[1,2-b]pyridazine (5i):** Eluent: PE/EtOAc (9:1); Colorless oil, 56% yield, 28.3 mg; <sup>1</sup>H NMR (400 MHz, CDCl<sub>3</sub>) δ 7.13 (d, *J* = 1.5 Hz, 1H), 6.98 (d, *J* = 1.5 Hz, 1H), 3.11 – 3.04 (m, 1H), 3.02 – 2.97 (m, 2H), 1.64 – 1.38 (m, 10H), 1.25 (s, 1H), 0.85 (s, 3H). <sup>13</sup>C NMR (101 MHz, CDCl<sub>3</sub>) δ 155.5, 136.4, 126.3, 117.6, 77.3, 77.0, 76.7, 37.9, 35.4, 35.1, 32.2, 25.9, 21.8, 21.6. **HRMS (ESI)** *m/z* calcd for C<sub>13</sub>H<sub>21</sub>ClN<sub>3</sub><sup>+</sup> [M+H]<sup>+</sup>: 254.1419; found: 254.1416.

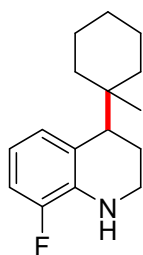

**8-fluoro-4-(1-methylcyclohexyl)-1,2,3,4-tetrahydroquinoline (5j):** Eluent: PE/EtOAc (100:1); Colorless oil, 77% yield, 38.1 mg; <sup>1</sup>H NMR (400 MHz, CDCl<sub>3</sub>) δ 6.86 (dd, *J* = 10.9, 8.5 Hz, 1H), 6.76 (d, *J* = 7.6 Hz, 1H), 6.47 (q, *J* = 7.7 Hz, 1H), 4.04 (s, 1H), 3.45 (dd, *J* = 11.5, 3.7 Hz, 2H), 2.70 (s, 1H), 2.31 – 2.18 (m, 1H), 1.77 – 1.48 (m, 7H), 1.45 – 1.22 (m, 4H), 0.81 (s, 3H). <sup>13</sup>C NMR (101 MHz, CDCl<sub>3</sub>) δ 150.6 (d, *J* = 236.2 Hz), 133.4 (d, *J* = 11.3 Hz), 126.2 (d, *J* = 2.8 Hz), 124.4 (d, *J* = 3.4 Hz), 113.4 (d, *J* = 7.4 Hz), 112.2 (d, *J* = 18.1 Hz), 77.4, 77.0, 76.7, 39.0, 37.5, 37.2, 36.0, 26.3, 22.3, 22.3, 21.9. <sup>19</sup>F NMR (376 MHz, CDCl<sub>3</sub>) δ -64.12. **HRMS (ESI)** *m/z* calcd for C<sub>16</sub>H<sub>23</sub>FN<sup>+</sup> [M+H]<sup>+</sup>: 248.1809; found: 248.1808.



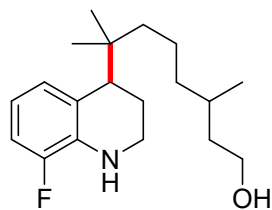

**7-(8-fluoro-1,2,3,4-tetrahydroquinolin-4-yl)-3,7-dimethyloctan-1-ol (5k):** Eluent: PE/EtOAc (9:1); Colorless oil, 36% yield, 22.2 mg;  $^1\text{H NMR}$  (400 MHz,  $\text{DMSO-}d_6$ )  $\delta$  6.81 (dd,  $J = 11.3, 8.2$  Hz, 1H), 6.65 (d,  $J = 7.5$  Hz, 1H), 6.33 (q,  $J = 7.7$  Hz, 1H), 5.54 (s, 1H), 4.31 (t,  $J = 5.0$  Hz, 1H), 3.41 (m, 2H), 3.32 – 3.17 (m, 2H), 2.58 (s, 1H), 2.05 (d,  $J = 13.5$  Hz, 1H), 1.48 (m, 3H), 1.35 – 1.12 (m, 6H), 1.06 (d,  $J = 8.7$  Hz, 1H), 0.83 (d,  $J = 7.9$  Hz, 6H), 0.76 (s, 3H).  $^{13}\text{C NMR}$  (101 MHz,  $\text{DMSO-}d_6$ )  $\delta$  150.4 (d,  $J = 235.0$  Hz), 134.0 (d,  $J = 11.5$  Hz), 126.5 (d,  $J = 2.0$  Hz), 123.9 (d,  $J = 3.6$  Hz), 112.7 (d,  $J = 7.3$  Hz), 112.5, 59.3, 42.5, 41.2, 40.6, 40.4, 40.4, 40.1, 39.9, 39.7, 39.5, 39.3, 38.3, 38.2, 37.4, 29.5, 27.7, 27.7, 26.1, 22.9, 21.3, 20.1.  $^{19}\text{F NMR}$  (376 MHz,  $\text{DMSO-}d_6$ )  $\delta$  -62.16. **HRMS (ESI)**  $m/z$  calcd for  $\text{C}_{19}\text{H}_{31}\text{FNO}^+$   $[\text{M}+\text{H}]^+$ : 308.2384; found: 308.2380.

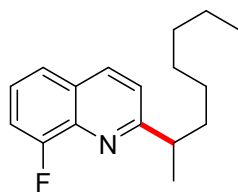

**8-fluoro-2-(octan-2-yl)quinoline (5l):** Eluent: PE/EtOAc (100:1); Colorless oil, 40% yield, 21.0 mg;  $^1\text{H NMR}$  (400 MHz,  $\text{DMSO-}d_6$ )  $\delta$  8.33 (d,  $J = 9.9$  Hz, 1H), 7.78 – 7.70 (m, 1H), 7.57 – 7.45 (m, 3H), 3.04 (q,  $J = 6.9$  Hz, 1H), 1.75 (dq,  $J = 13.5, 9.2, 6.8$  Hz, 1H), 1.59 (dq,  $J = 13.5, 7.7, 7.0$  Hz, 1H), 1.27 (d,  $J = 6.9$  Hz, 3H), 1.23 – 1.09 (m, 8H), 0.78 (t,  $J = 6.6$  Hz, 3H).  $^{13}\text{C NMR}$  (101 MHz,  $\text{DMSO-}d_6$ )  $\delta$  167.5, 157.5 (d,  $J = 254.2$  Hz), 137.5 (d,  $J = 11.5$  Hz), 136.8, 128.9 (d,  $J = 2.7$  Hz), 126.1 (d,  $J = 7.5$  Hz), 124.2, 121.8, 114.1 (d,  $J = 18.0$  Hz), 113.9, 42.5, 40.6, 40.4, 40.2, 40.0, 39.8, 39.6, 39.3, 36.8, 31.6, 29.2, 27.5, 22.5, 21.0, 14.3.  $^{19}\text{F NMR}$  (376 MHz,  $\text{DMSO-}d_6$ )  $\delta$  -50.13. **HRMS (ESI)**  $m/z$  calcd for  $\text{C}_{17}\text{H}_{23}\text{FN}^+$   $[\text{M}+\text{H}]^+$ : 260.1809; found: 260.1807.

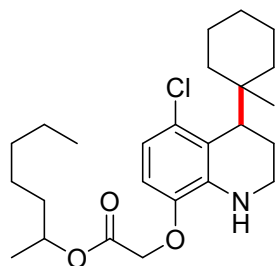

**heptan-2-yl 2-((5-chloro-4-(1-methylcyclohexyl)-1,2,3,4-tetrahydroquinolin-8-yl)oxy)acetate (5m):**

PE/EtOAc (50:1); Yellow oil, 10% yield, 8.7 mg;  $^1\text{H NMR}$  (400 MHz,  $\text{CDCl}_3$ )  $\delta$  6.53 (d,  $J = 8.5$  Hz, 1H), 6.45 (d,  $J = 8.4$  Hz, 1H), 5.03 (h,  $J = 6.5$  Hz, 1H), 4.68 (s, 1H), 4.57 – 4.54 (m, 2H), 3.03 – 2.93 (m, 2H), 2.60 (ddd,  $J = 17.4, 12.6, 5.8$  Hz, 1H), 2.07 – 1.99 (m, 1H), 1.64 – 1.19 (m, 22H), 0.95 (s, 3H), 0.87 (t,  $J = 6.7$  Hz, 3H).  $^{13}\text{C NMR}$  (101 MHz,  $\text{CDCl}_3$ )  $\delta$  168.6, 143.1, 137.5, 127.4, 119.4, 114.8, 110.3, 77.4, 77.4, 77.0, 76.7, 72.5, 66.6, 59.7, 35.8, 34.8, 34.6, 31.6, 26.4, 25.4, 25.0, 22.5, 21.7, 21.5, 20.0, 18.3, 14.0. **HRMS (ESI)**  $m/z$  calcd for  $\text{C}_{25}\text{H}_{39}\text{ClNO}_3^+$   $[\text{M}+\text{H}]^+$ : 436.2613; found: 436.2611.

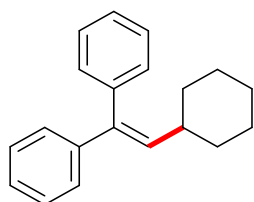

**(2-cyclohexylethene-1,1-diyl)dibenzene (6):** Eluent: PE; Colorless oil, 16% yield, 8.2 mg;  $^1\text{H NMR}$  (400 MHz,  $\text{CDCl}_3$ )  $\delta$  7.36 (dt,  $J = 16.7, 7.1$  Hz, 3H), 7.27 – 7.14 (m, 7H), 5.92 (d,  $J = 10.0$  Hz, 1H), 2.18 – 2.11 (m, 1H), 1.69 (d,  $J = 5.2$  Hz, 5H), 1.28 – 1.13 (m, 5H). **HRMS (ESI)**  $m/z$  calcd for  $\text{C}_{20}\text{H}_{23}^+$   $[\text{M}+\text{H}]^+$ : 263.1794; found: 263.1791.

## 11. Reference

1. J. C. Lo, J. Gui, Y. Yabe, C. M. Pan and P. S. Baran, Functionalized olefin cross-coupling to construct carbon-carbon bonds, *Nature*, 2014, **516**, 343-348.

## 12. Copies of $^1\text{H}$ and $^{13}\text{C}$ NMR Spectra

$^1\text{H}$  NMR spectrum (400 MHz,  $\text{CDCl}_3$ ) of **3a**

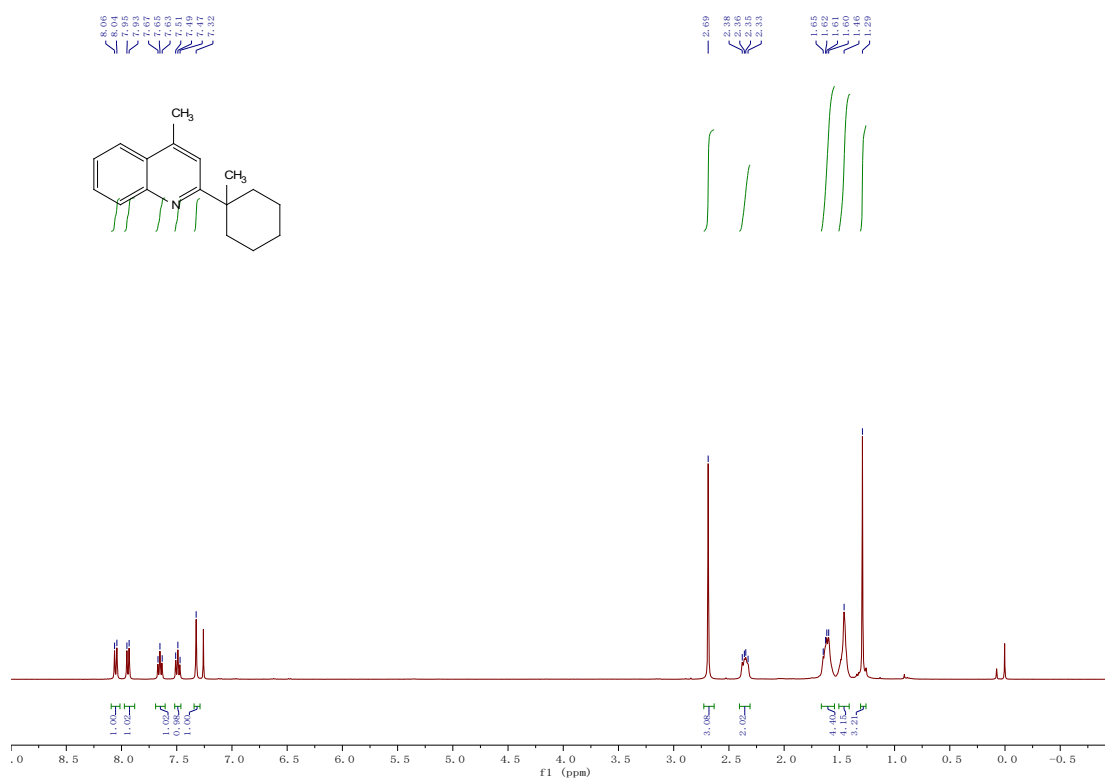

$^{13}\text{C}$  NMR spectrum (101 MHz,  $\text{CDCl}_3$ ) of **3a**

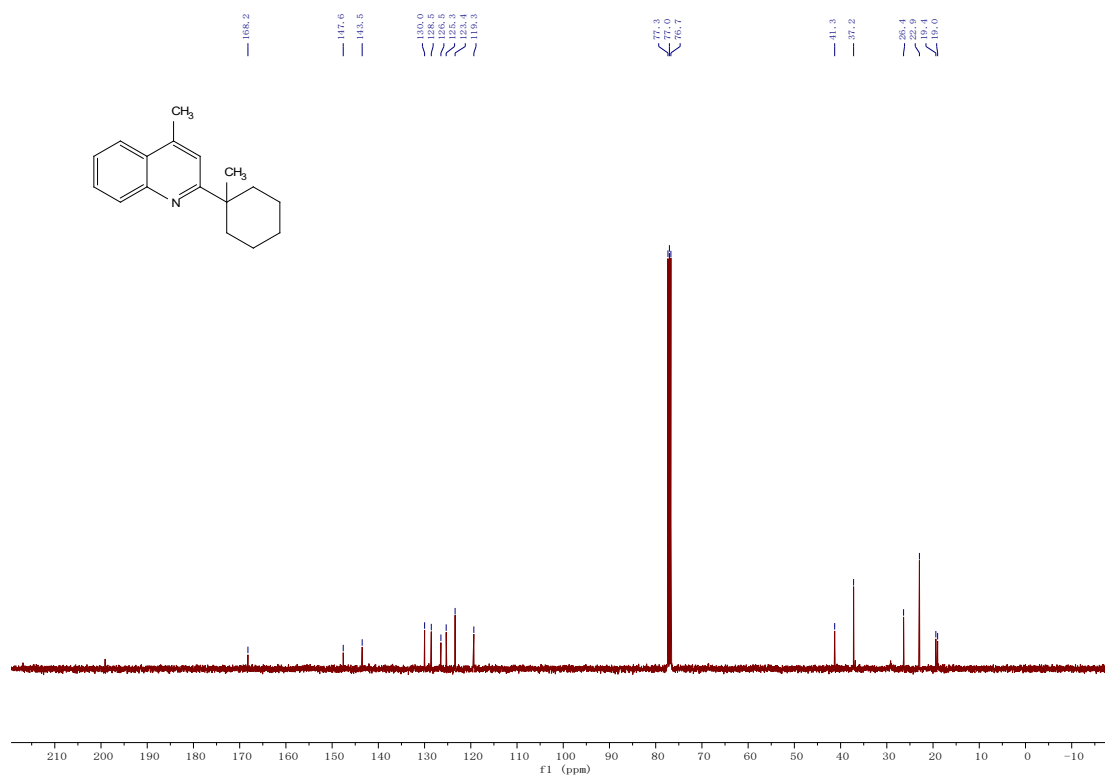

<sup>1</sup>H NMR spectrum (400 MHz, CDCl<sub>3</sub>) of **3b**

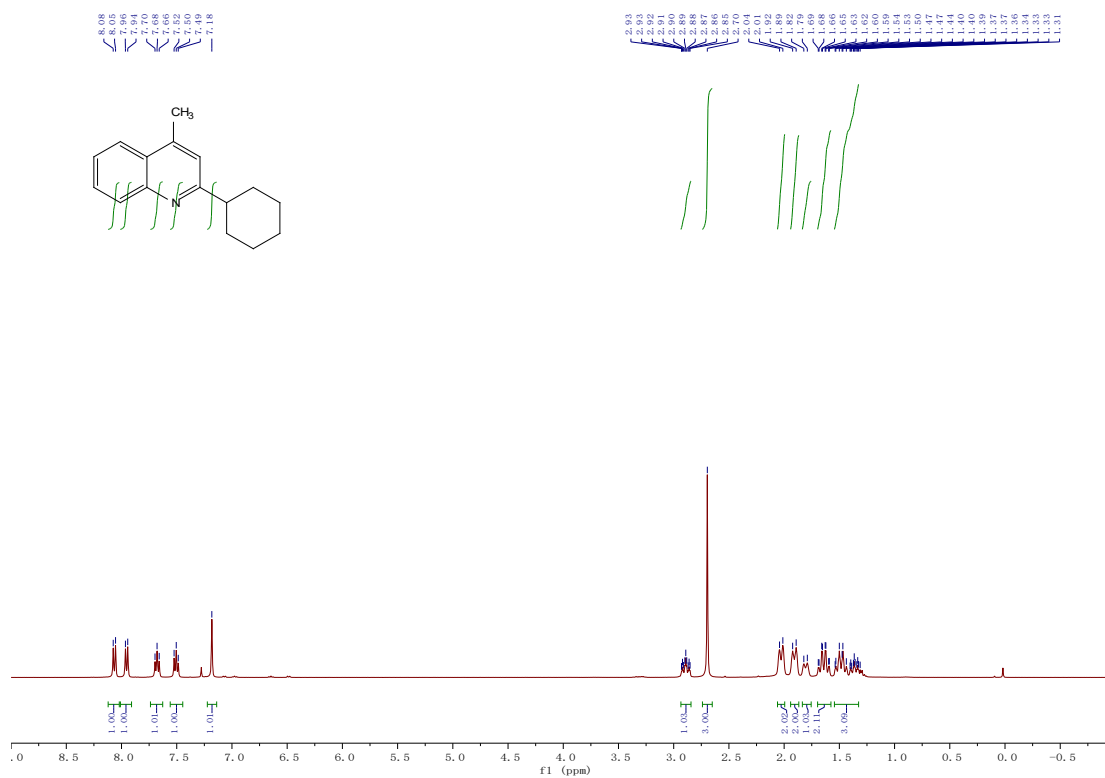

<sup>13</sup>C NMR spectrum (101 MHz, CDCl<sub>3</sub>) of **3b**

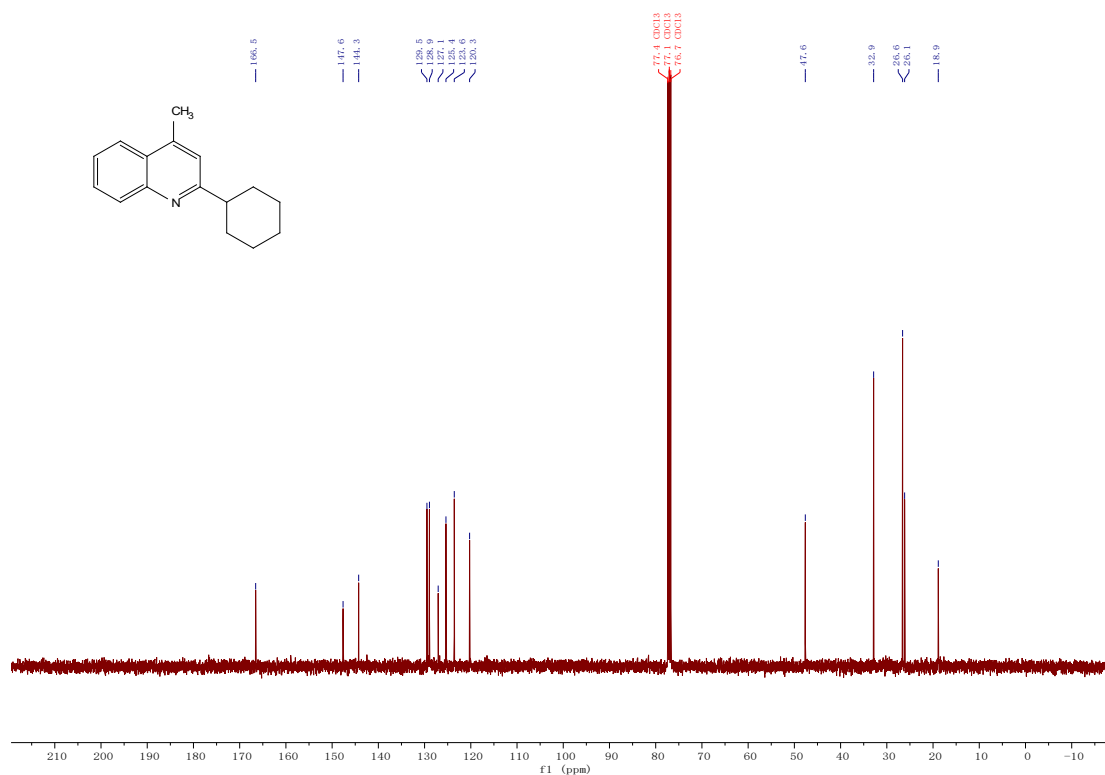

<sup>1</sup>H NMR spectrum (400 MHz, DMSO-*d*<sub>6</sub>) of **3c**

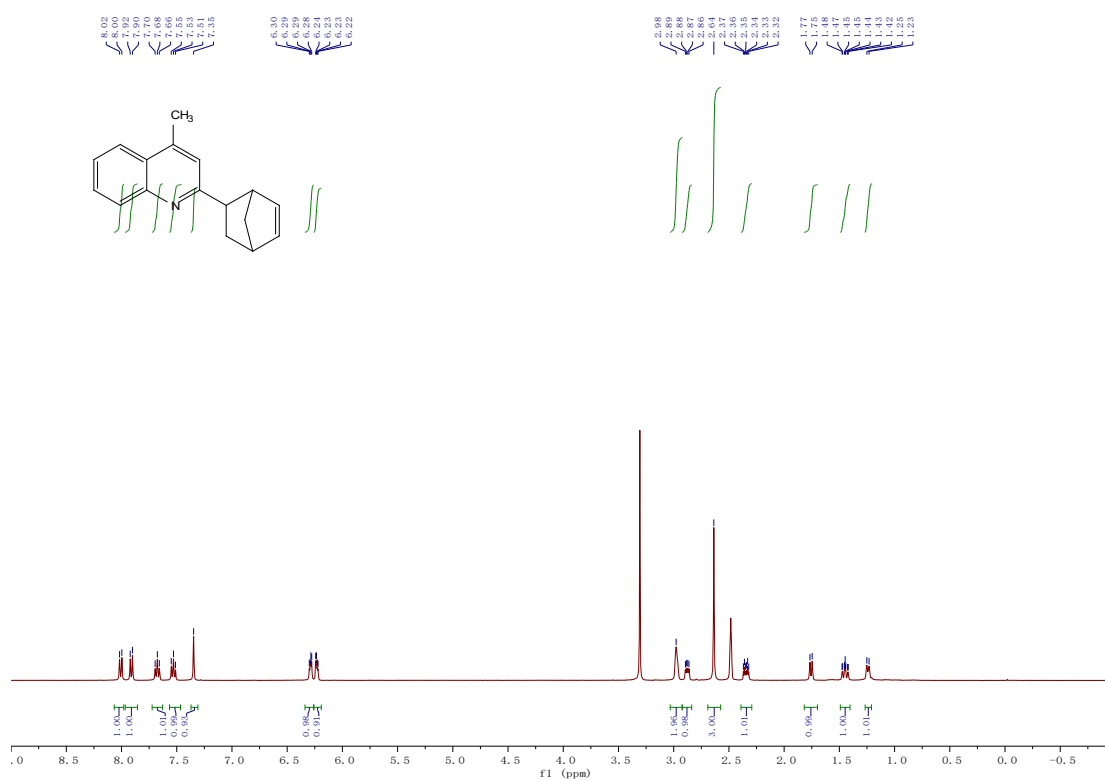

<sup>13</sup>C NMR spectrum (101 MHz, DMSO-*d*<sub>6</sub>) of **3c**

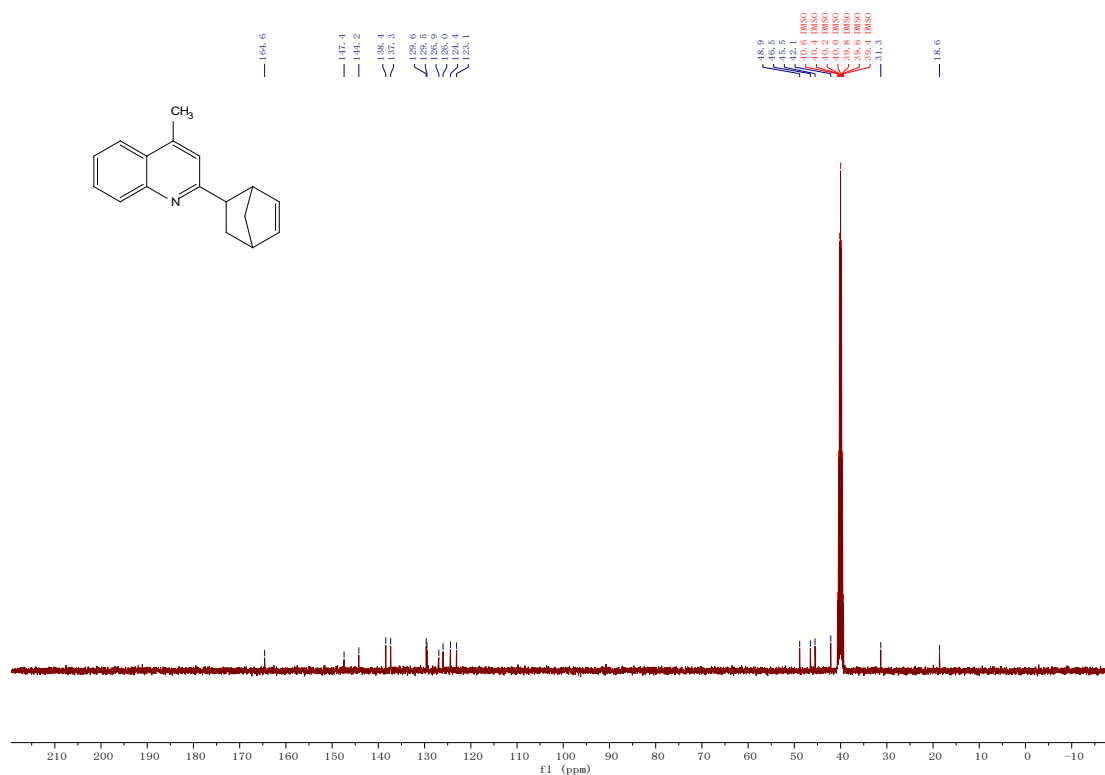

$^1\text{H}$  NMR spectrum (400 MHz,  $\text{CDCl}_3$ ) of **3d**

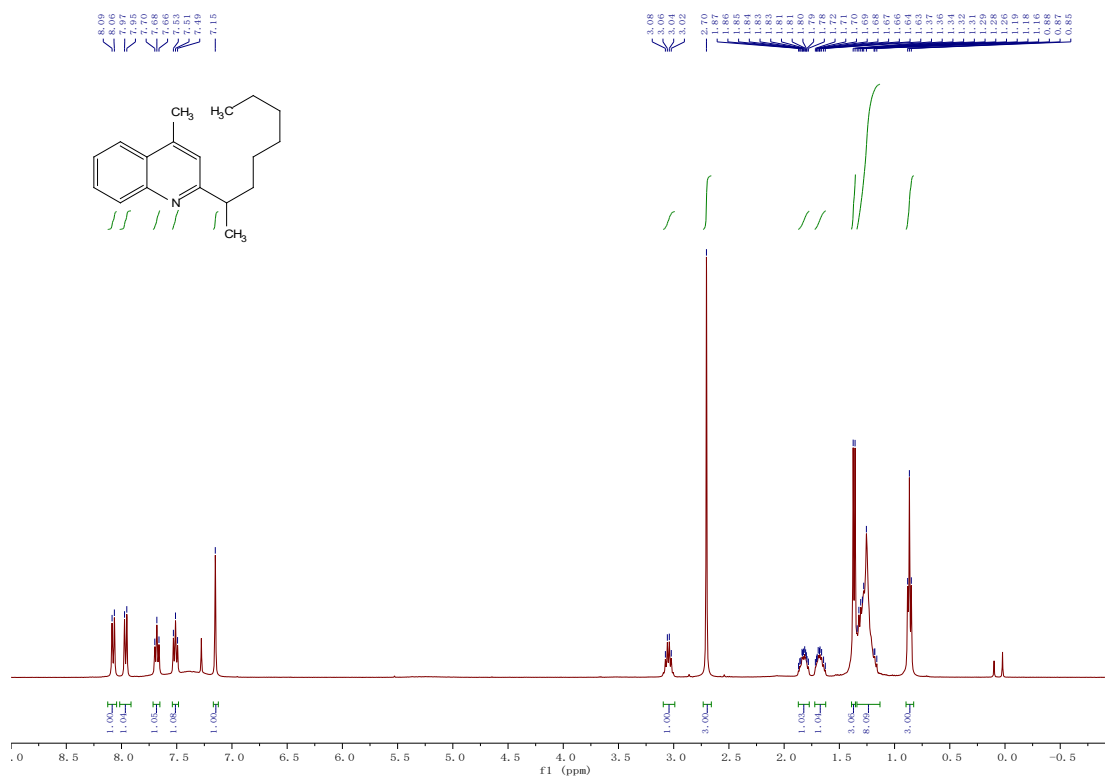

$^{13}\text{C}$  NMR spectrum (101 MHz,  $\text{CDCl}_3$ ) of **3d**

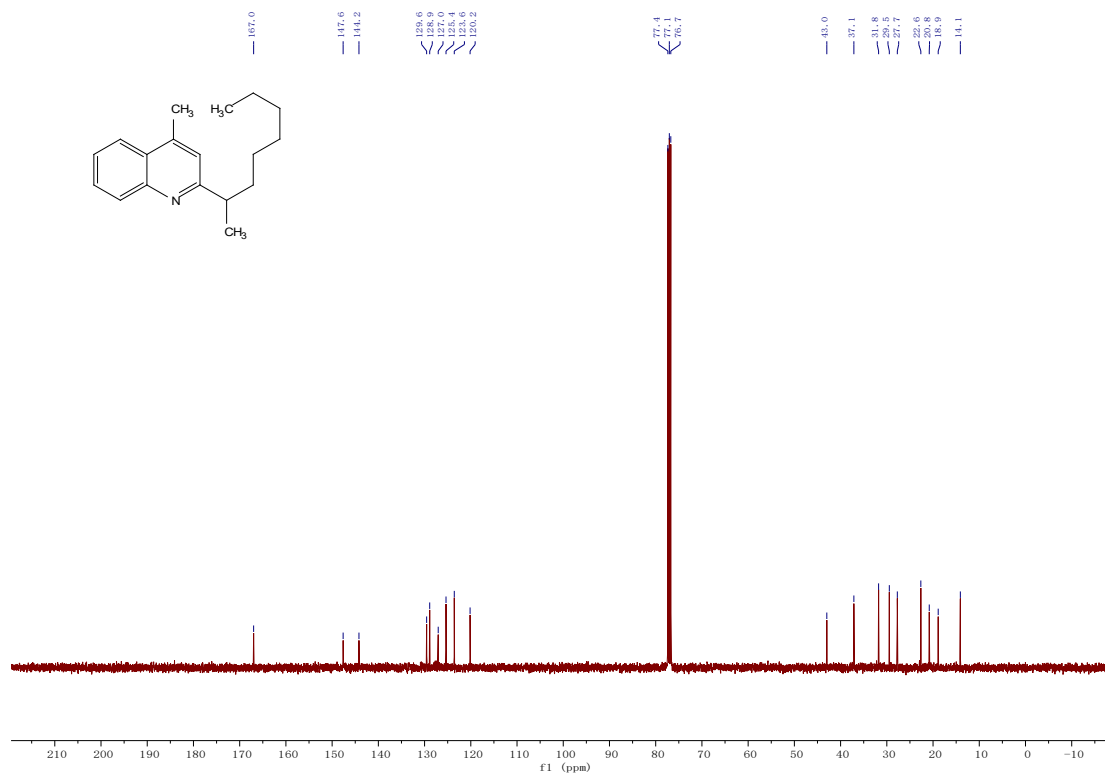







$^1\text{H}$  NMR spectrum (400 MHz,  $\text{DMSO-}d_6$ ) of **3g**

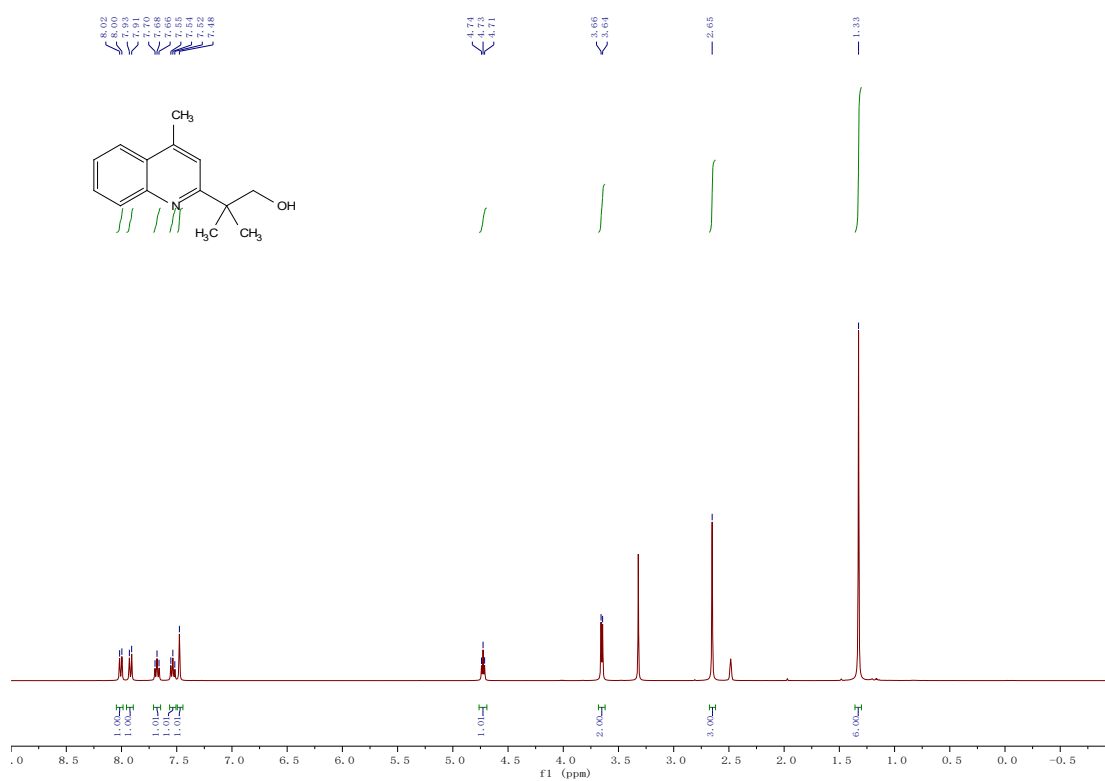

$^{13}\text{C}$  NMR spectrum (101 MHz,  $\text{DMSO-}d_6$ ) of **3g**

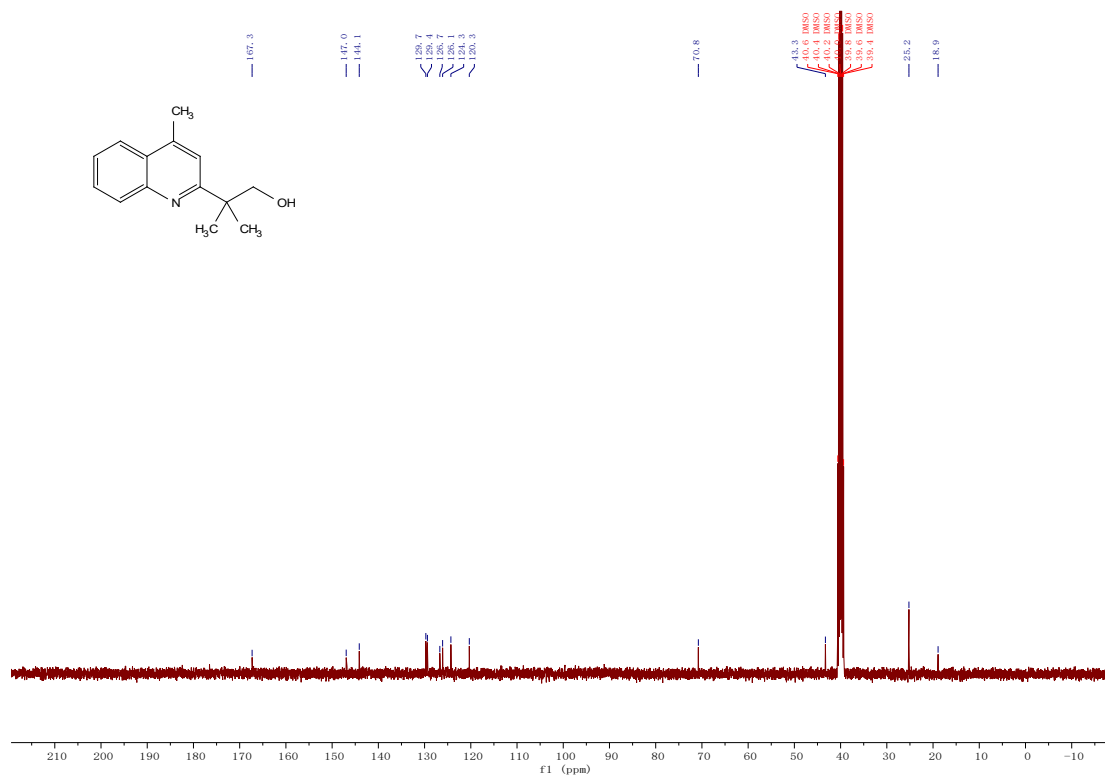



<sup>1</sup>H NMR spectrum (400 MHz, CDCl<sub>3</sub>) of **3i**

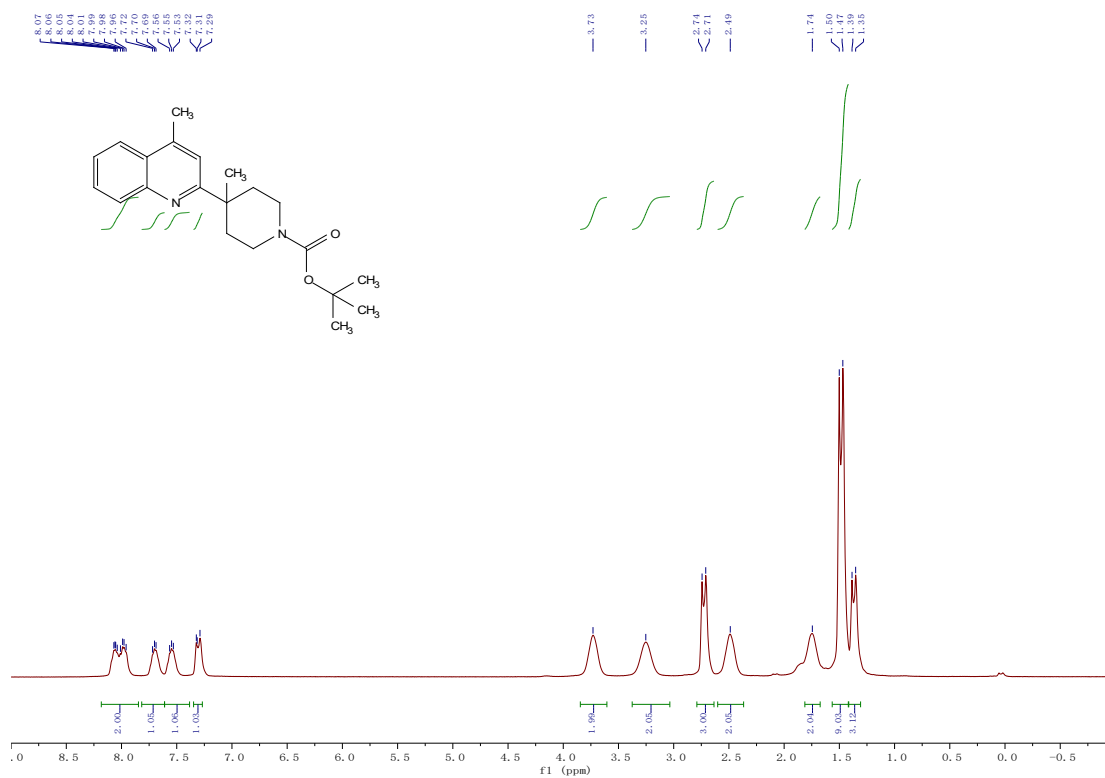

<sup>13</sup>C NMR spectrum (101 MHz, CDCl<sub>3</sub>) of **3i**

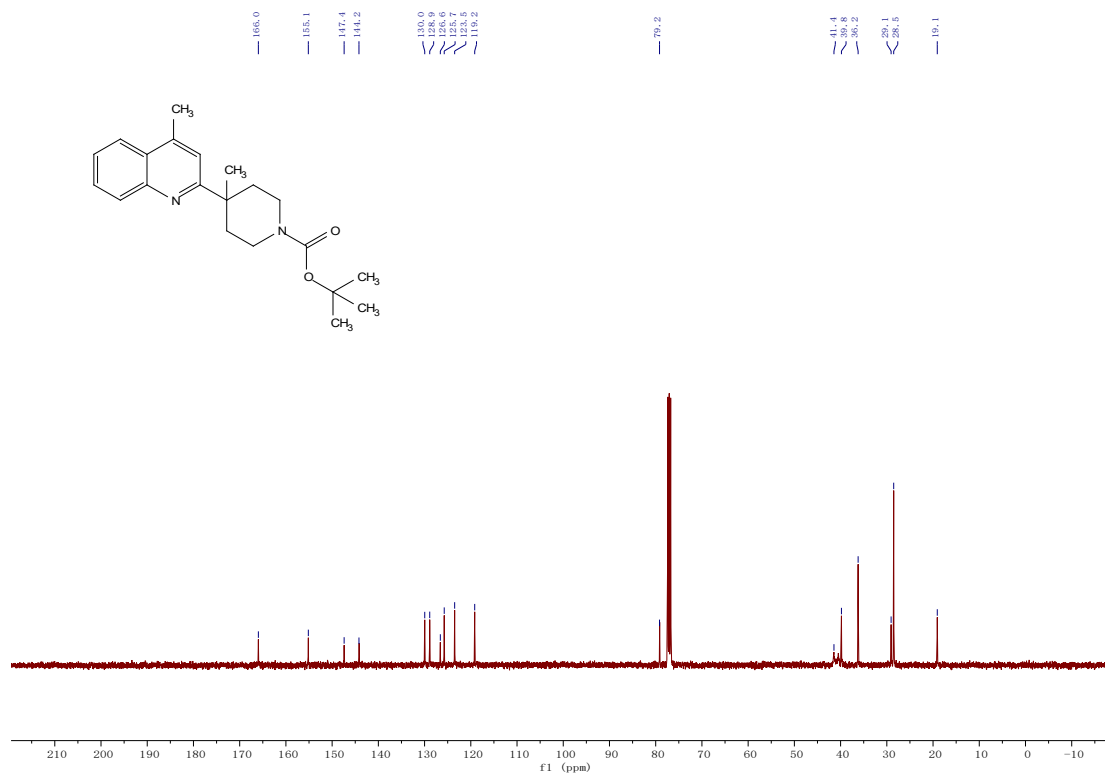

<sup>1</sup>H NMR spectrum (400 MHz, DMSO-*d*<sub>6</sub>) of **3j**

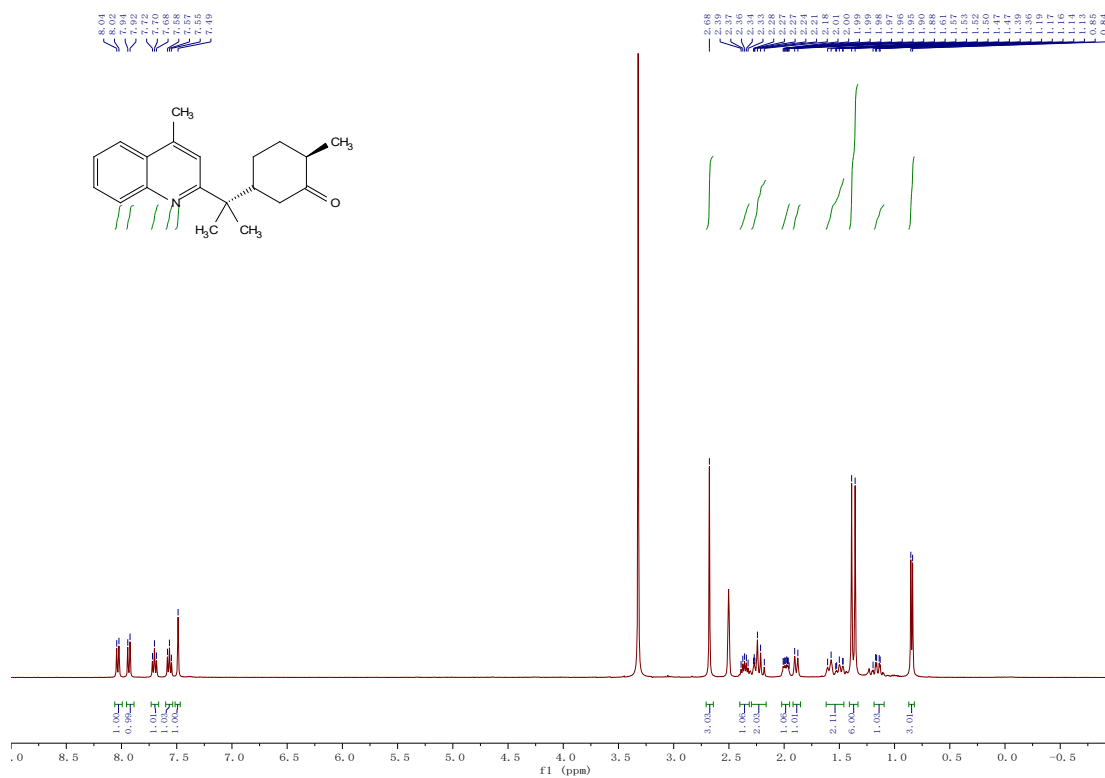

<sup>13</sup>C NMR spectrum (101 MHz, DMSO-*d*<sub>6</sub>) of **3j**

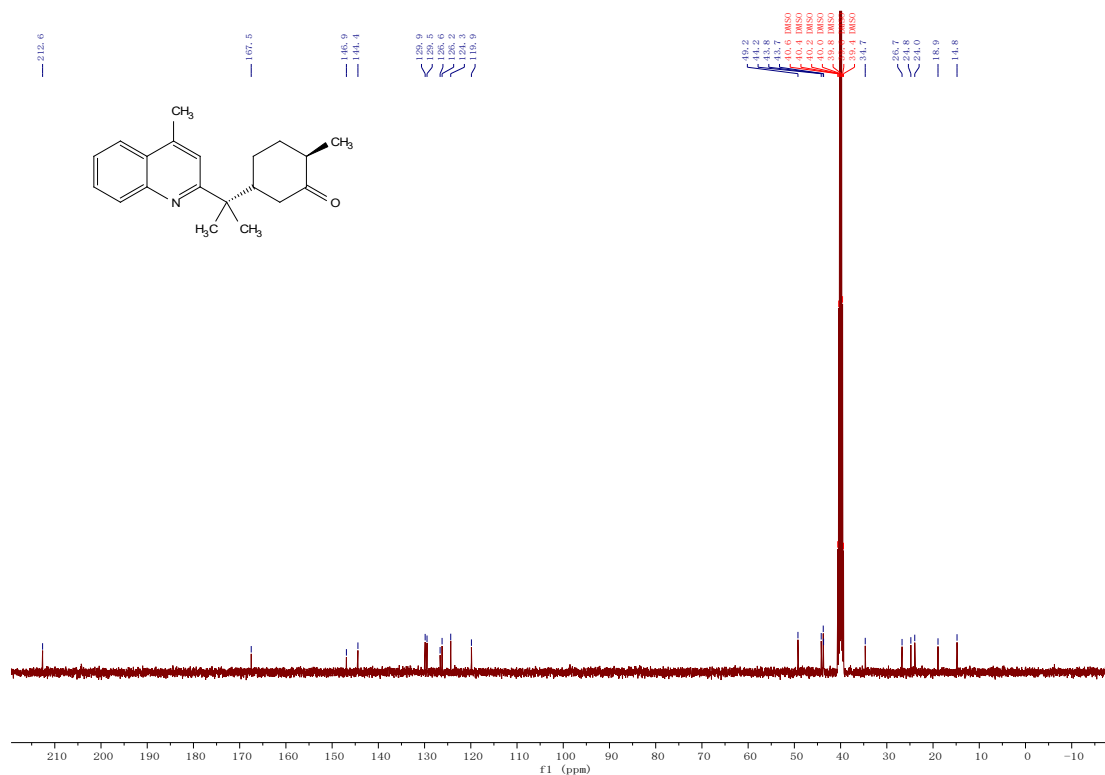

$^1\text{H}$  NMR spectrum (400 MHz,  $\text{DMSO-}d_6$ ) of **3k**

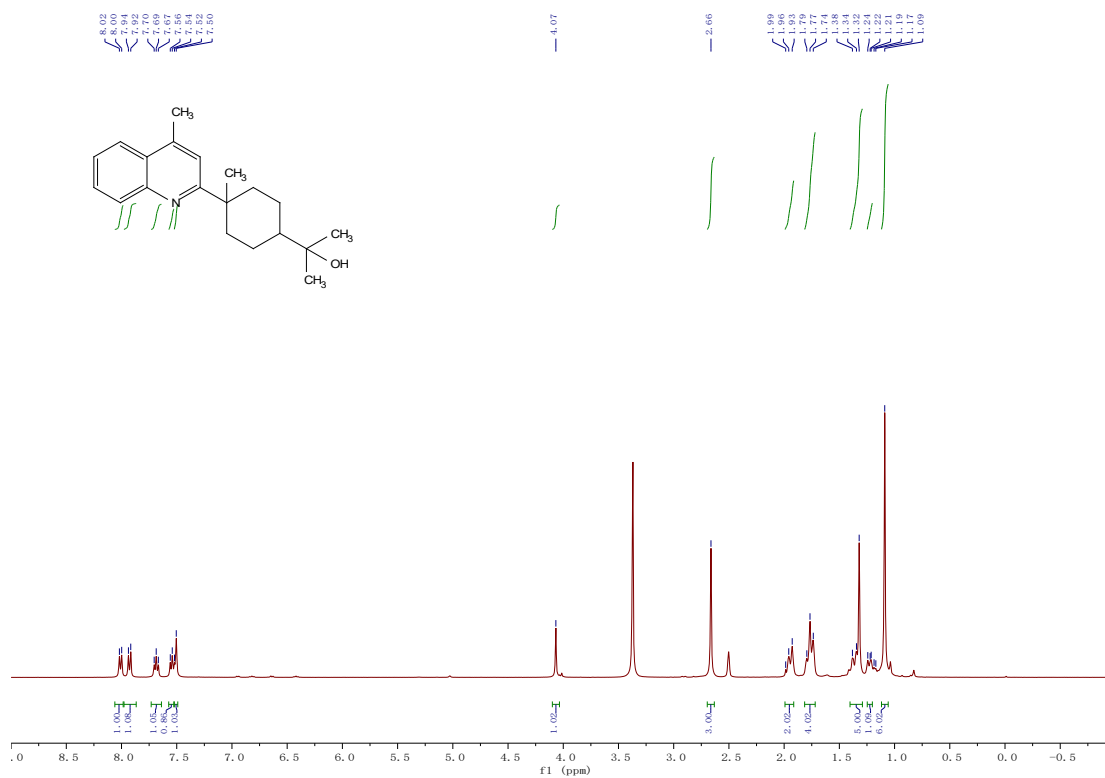

$^{13}\text{C}$  NMR spectrum (101 MHz,  $\text{DMSO-}d_6$ ) of **3k**

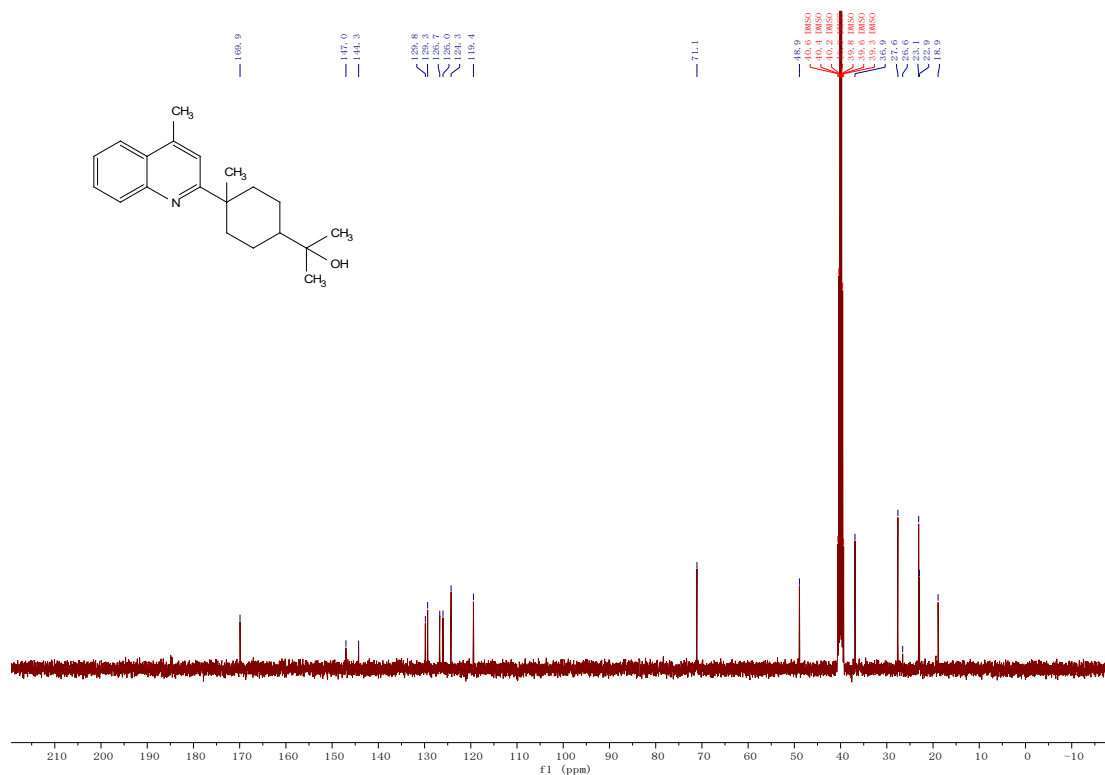

<sup>1</sup>H NMR spectrum (400 MHz, CDCl<sub>3</sub>) of **31**

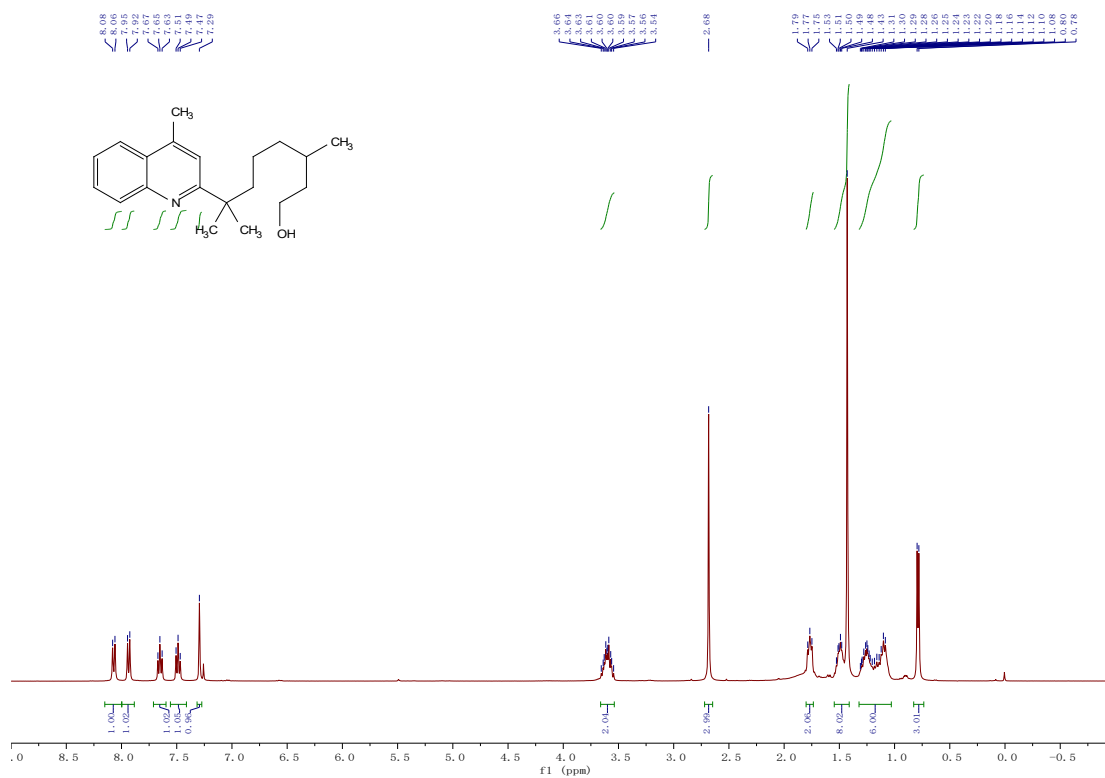

<sup>13</sup>C NMR spectrum (101 MHz, CDCl<sub>3</sub>) of **31**

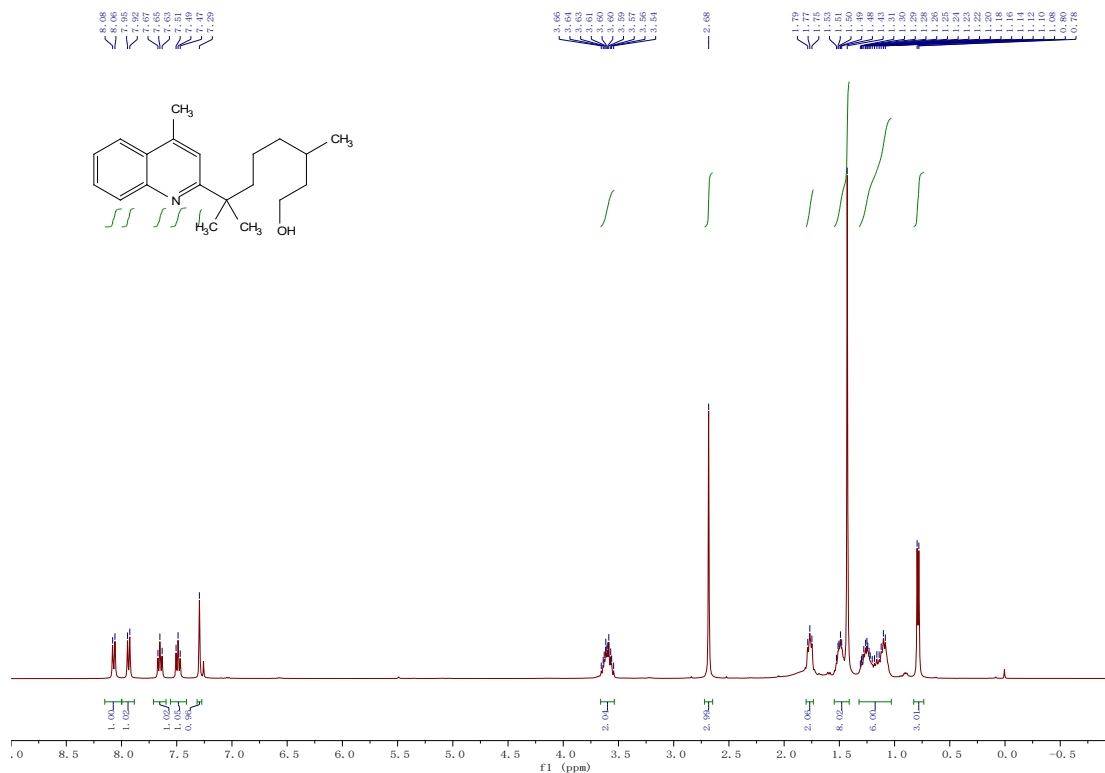

$^1\text{H}$  NMR spectrum (400 MHz,  $\text{CDCl}_3$ ) of **3m**

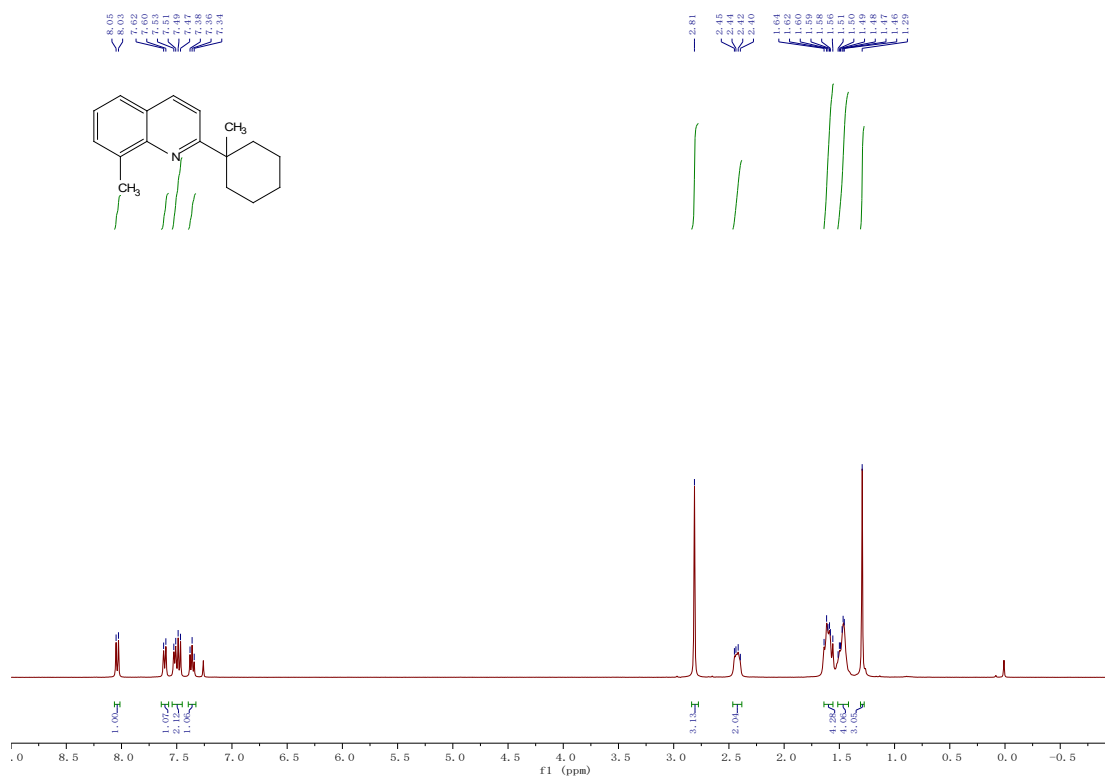

$^{13}\text{C}$  NMR spectrum (101 MHz,  $\text{CDCl}_3$ ) of **3m**

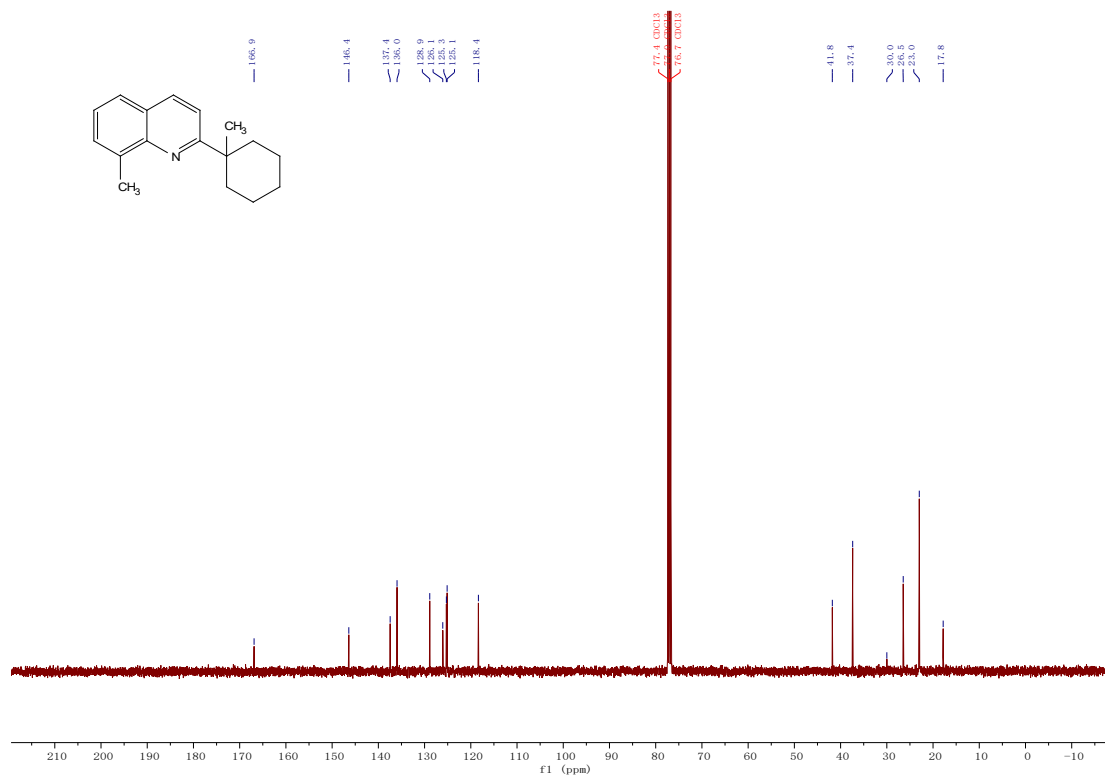

<sup>1</sup>H NMR spectrum (400 MHz, CDCl<sub>3</sub>) of **3n**

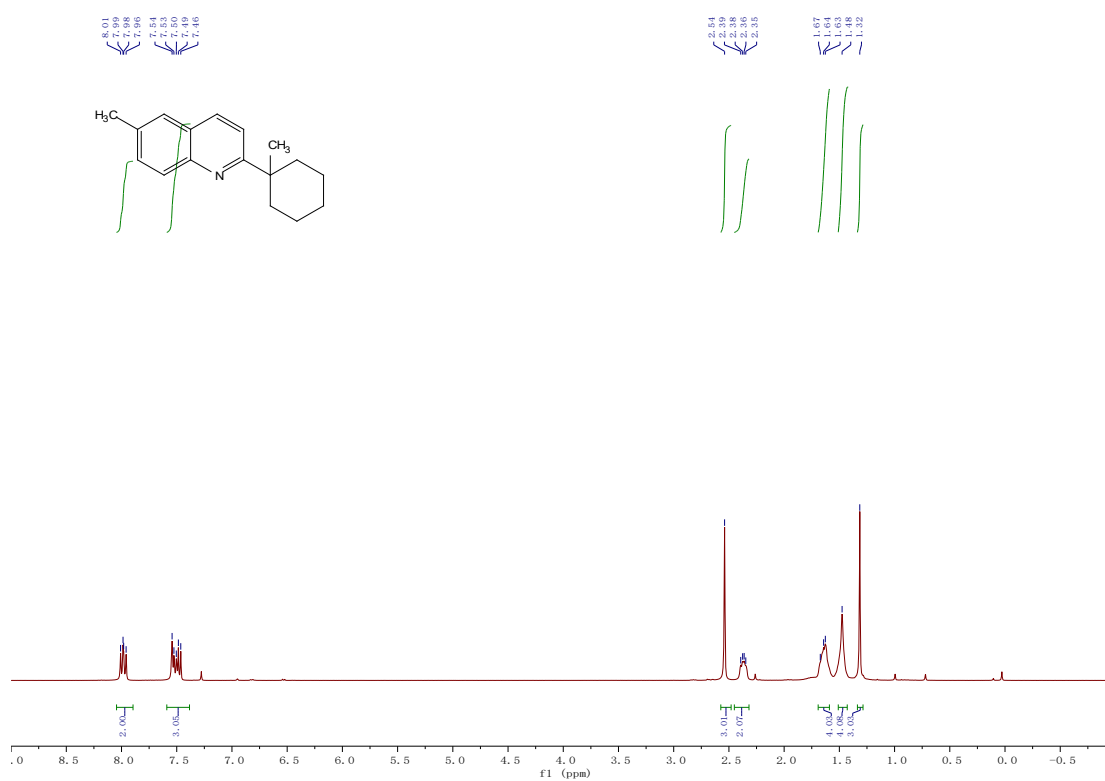

<sup>13</sup>C NMR spectrum (101 MHz, CDCl<sub>3</sub>) of **3n**

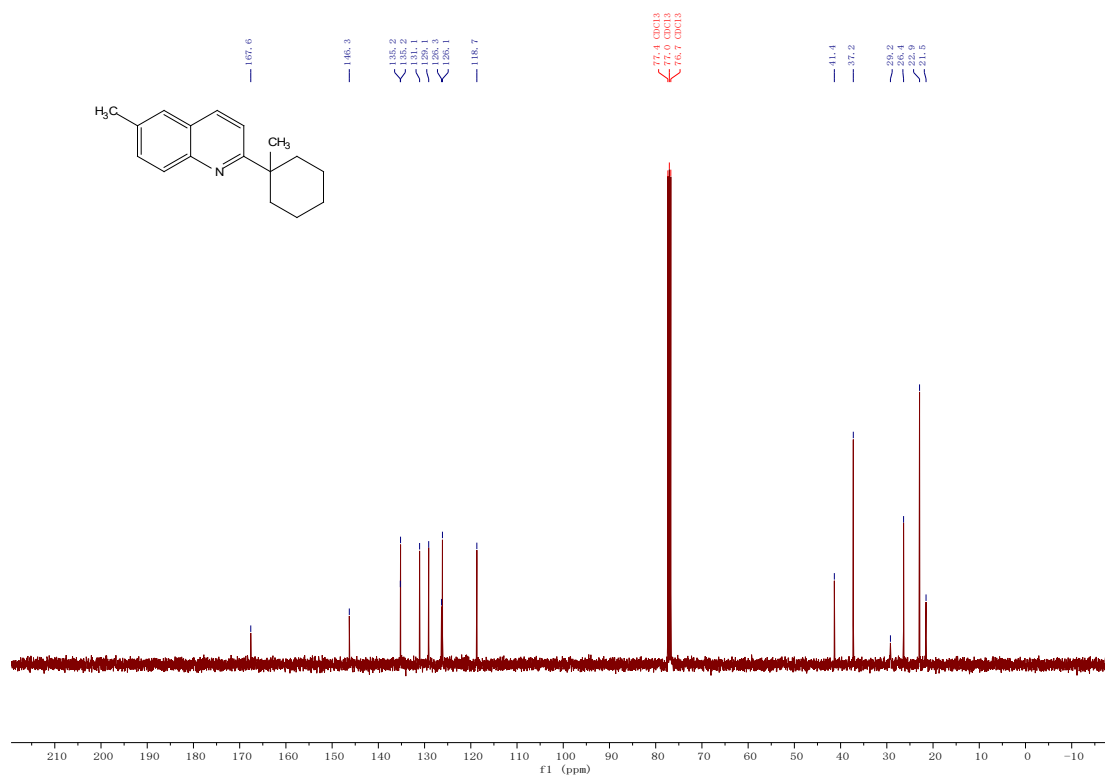



<sup>1</sup>H NMR spectrum (400 MHz, CDCl<sub>3</sub>) of **3o**

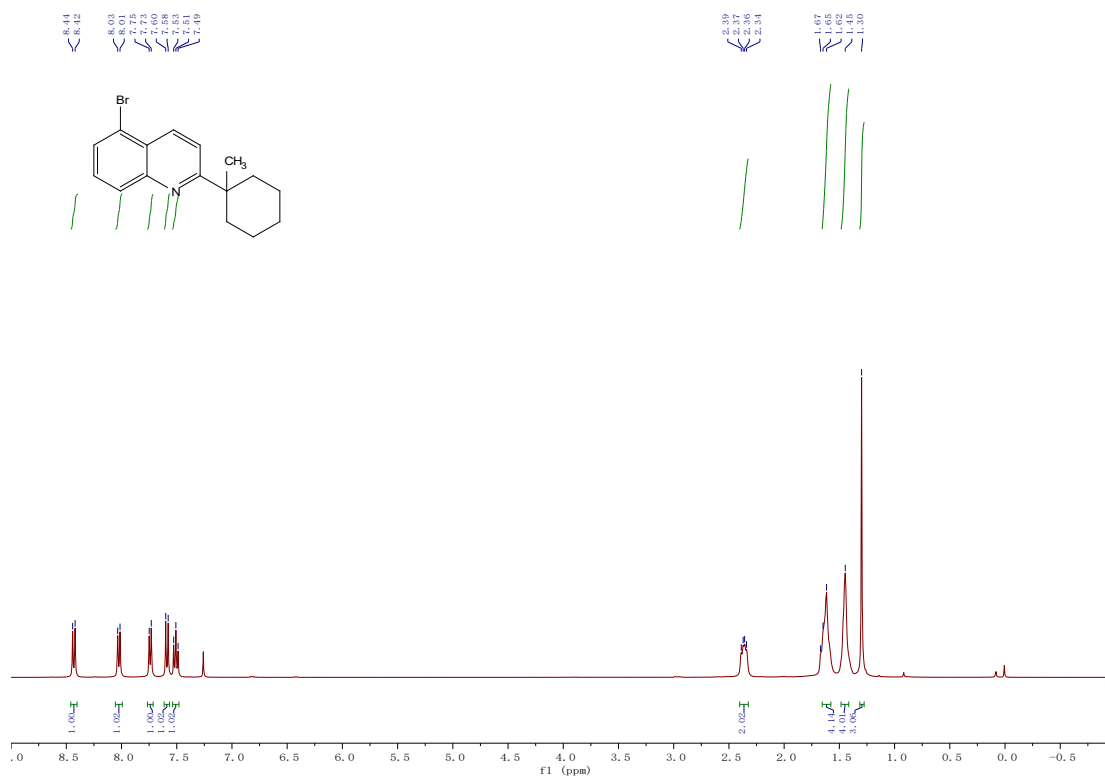

<sup>13</sup>C NMR spectrum (101 MHz, CDCl<sub>3</sub>) of **3o**

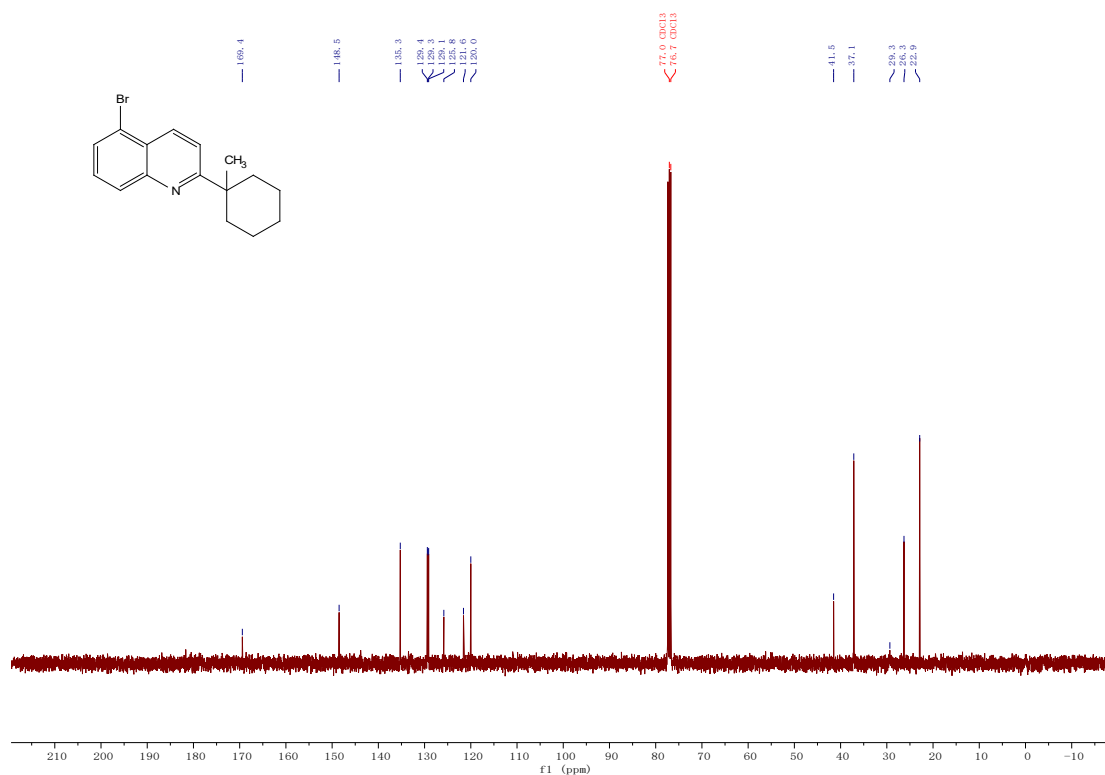

$^1\text{H}$  NMR spectrum (400 MHz,  $\text{CDCl}_3$ ) of **3p**

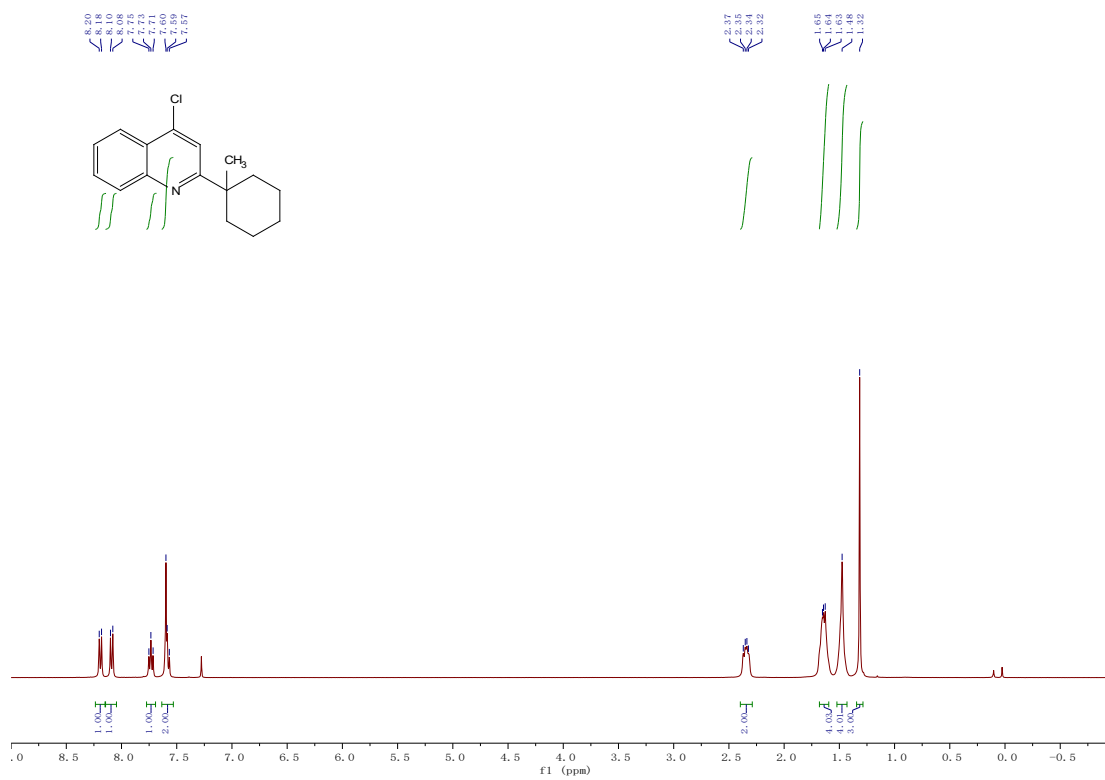

$^{13}\text{C}$  NMR spectrum (101 MHz,  $\text{CDCl}_3$ ) of **3p**

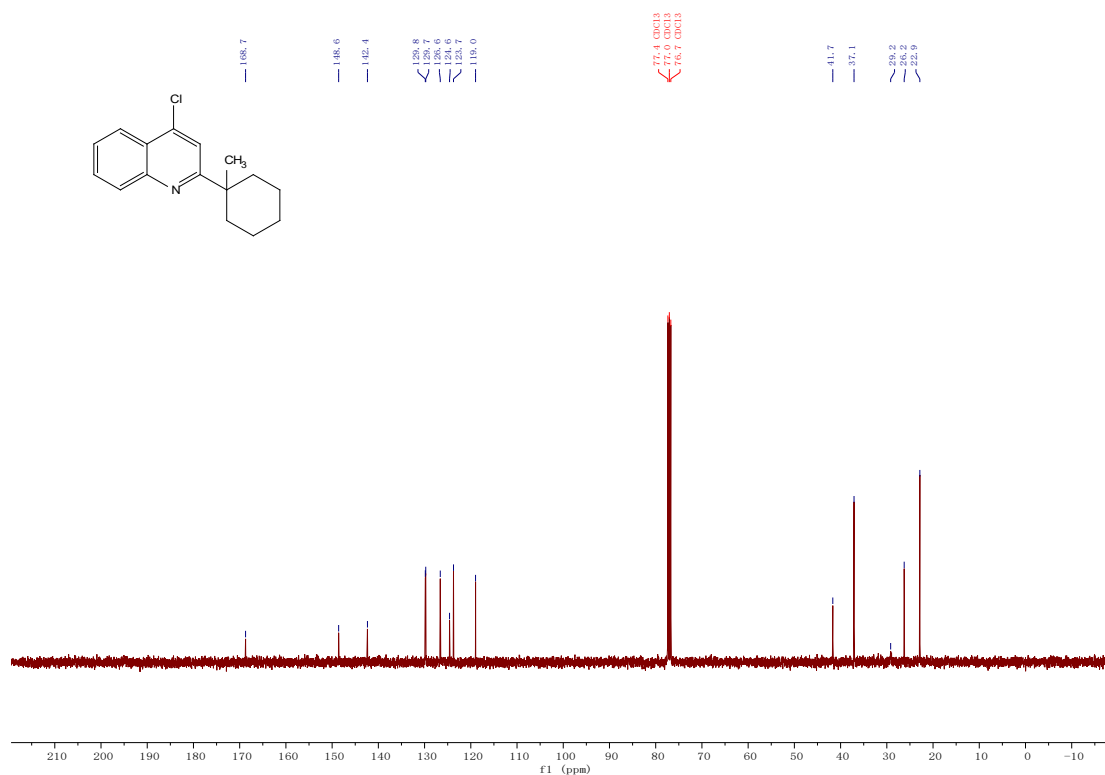

<sup>1</sup>H NMR spectrum (400 MHz, DMSO-*d*<sub>6</sub>) of **3q**

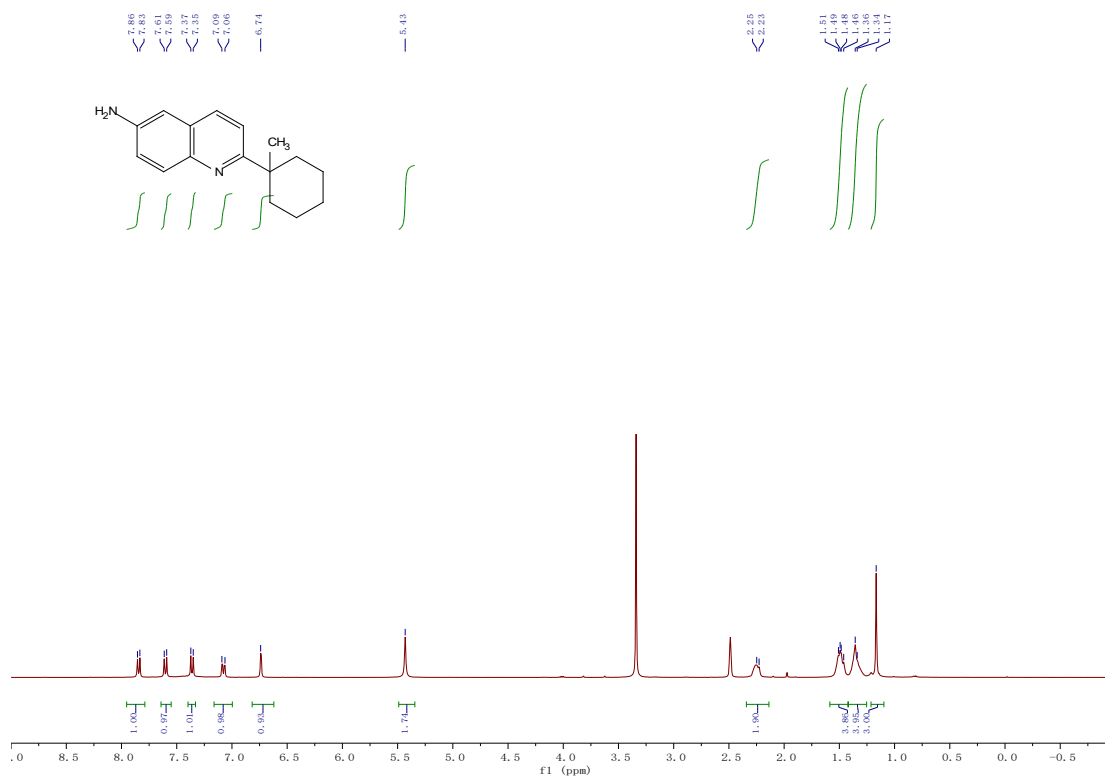

<sup>13</sup>C NMR spectrum (101 MHz, DMSO-*d*<sub>6</sub>) of **3q**

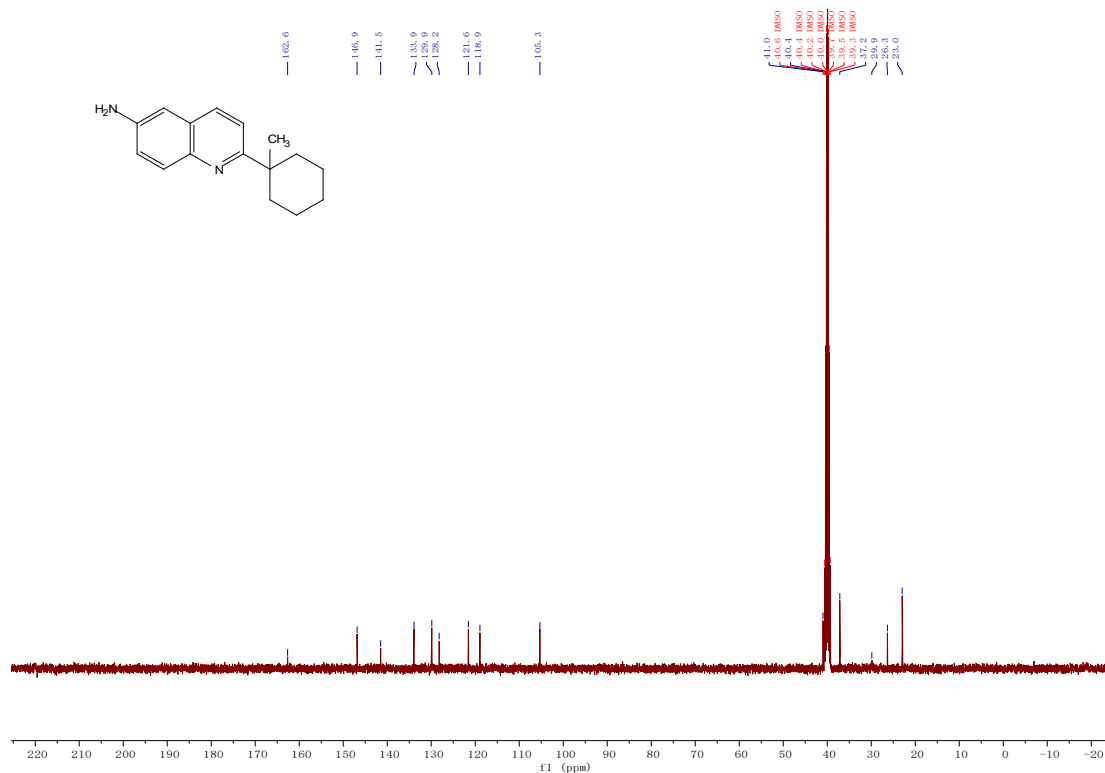

$^1\text{H}$  NMR spectrum (400 MHz,  $\text{CDCl}_3$ ) of **3r**

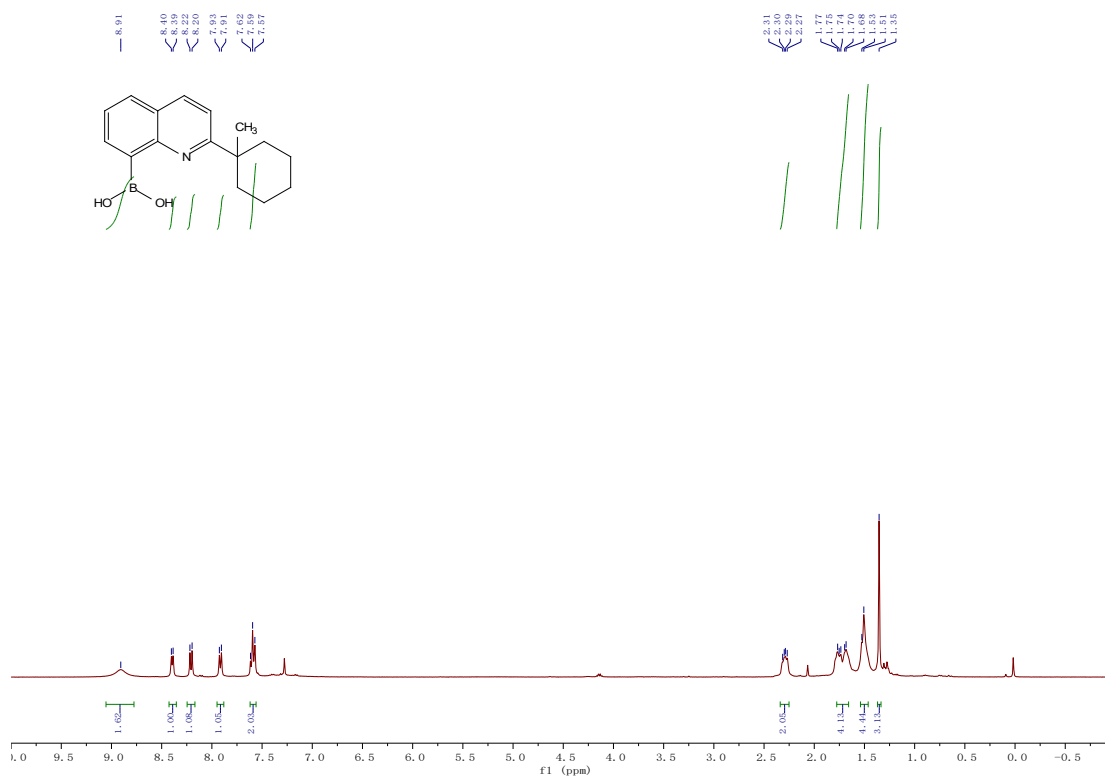

$^{13}\text{C}$  NMR spectrum (101 MHz,  $\text{CDCl}_3$ ) of **3r**

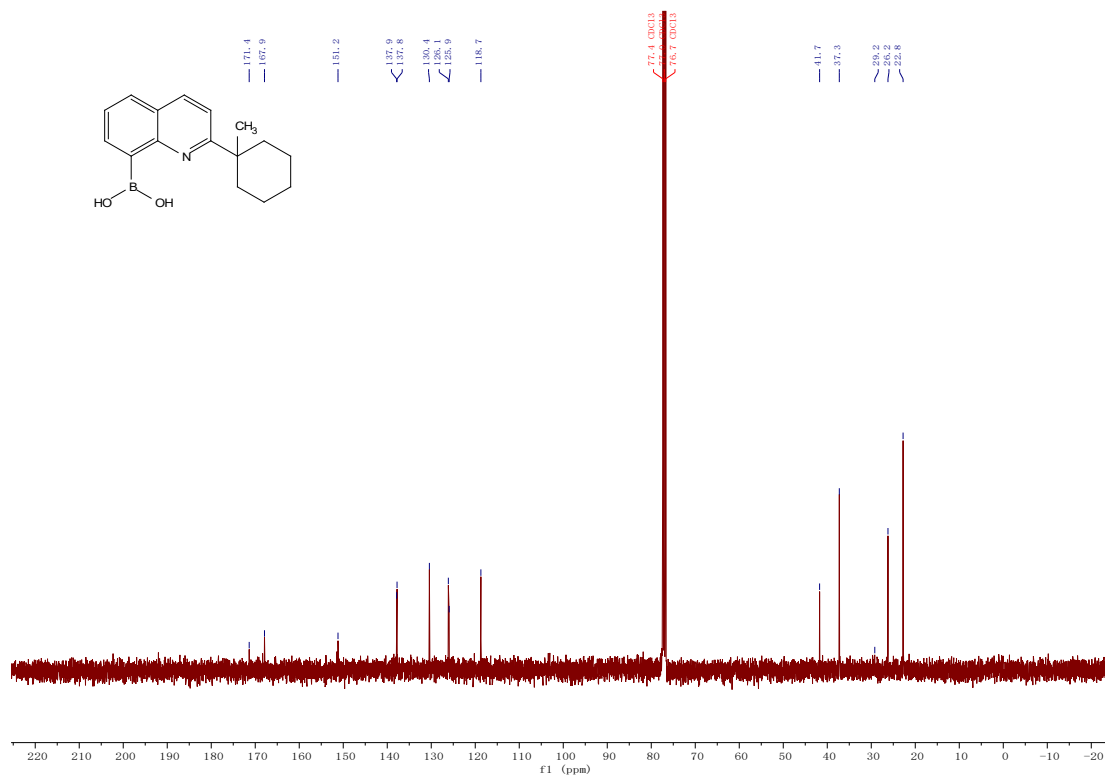

<sup>1</sup>H NMR spectrum (400 MHz, CDCl<sub>3</sub>) of **3s**

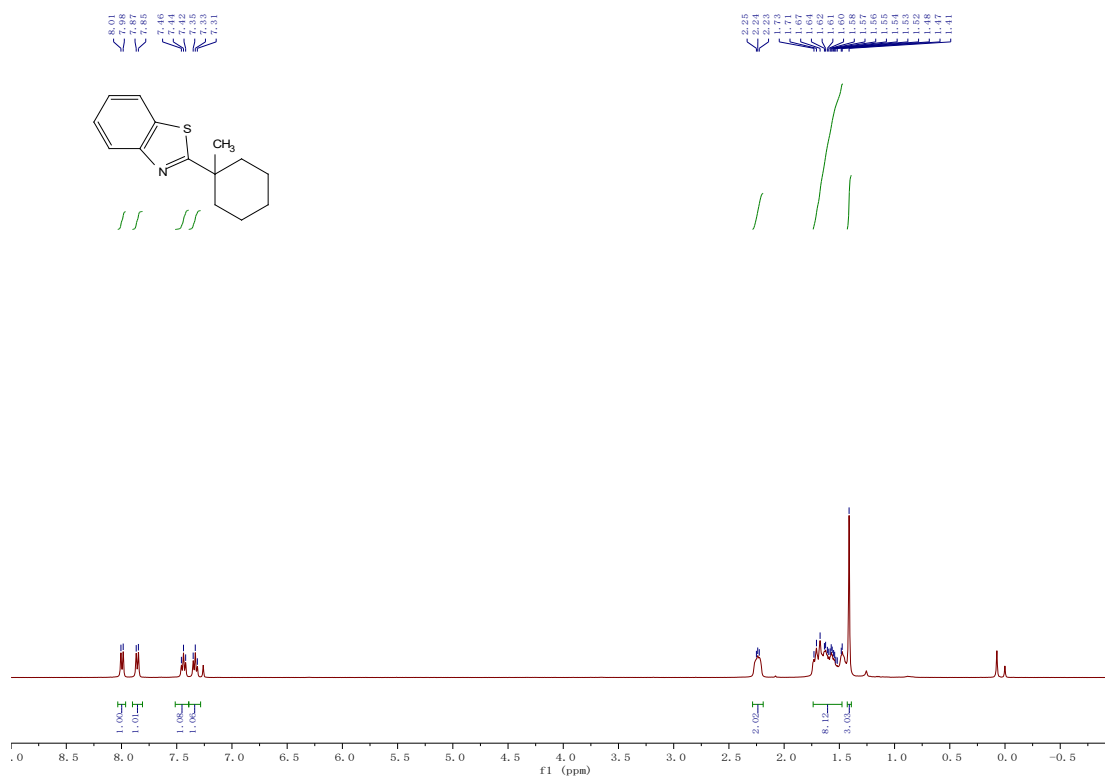

<sup>13</sup>C NMR spectrum (101 MHz, CDCl<sub>3</sub>) of **3s**

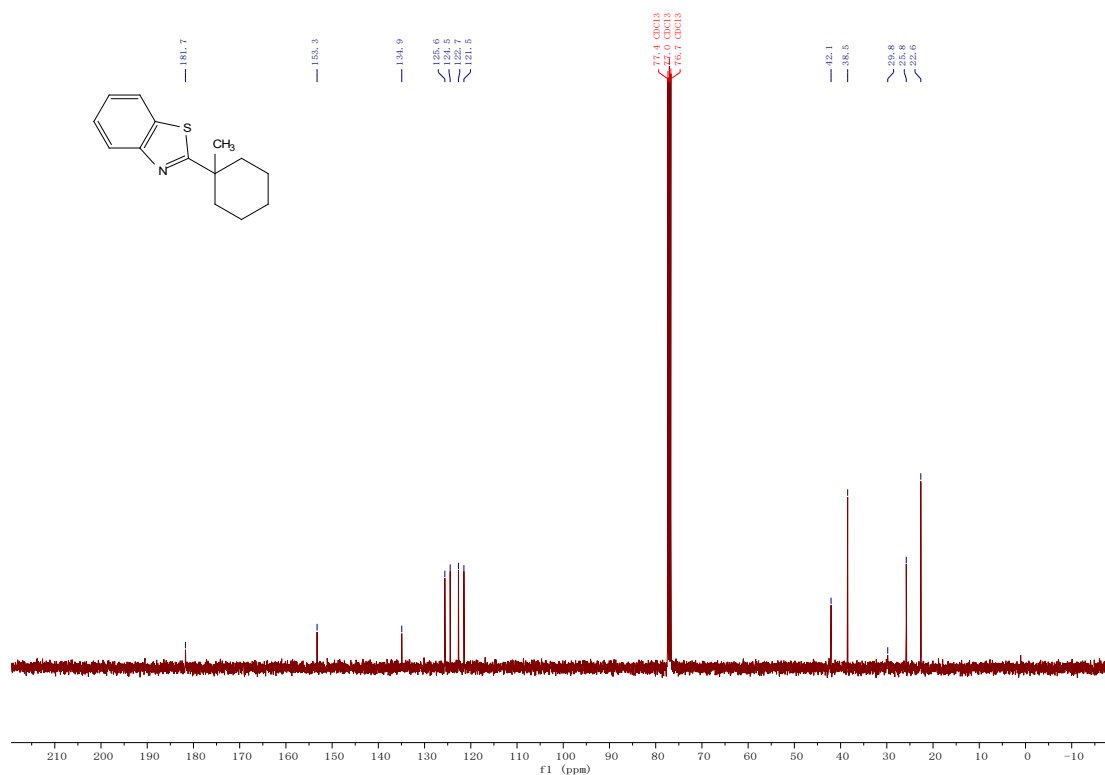

<sup>1</sup>H NMR spectrum (400 MHz, CDCl<sub>3</sub>) of **3t**

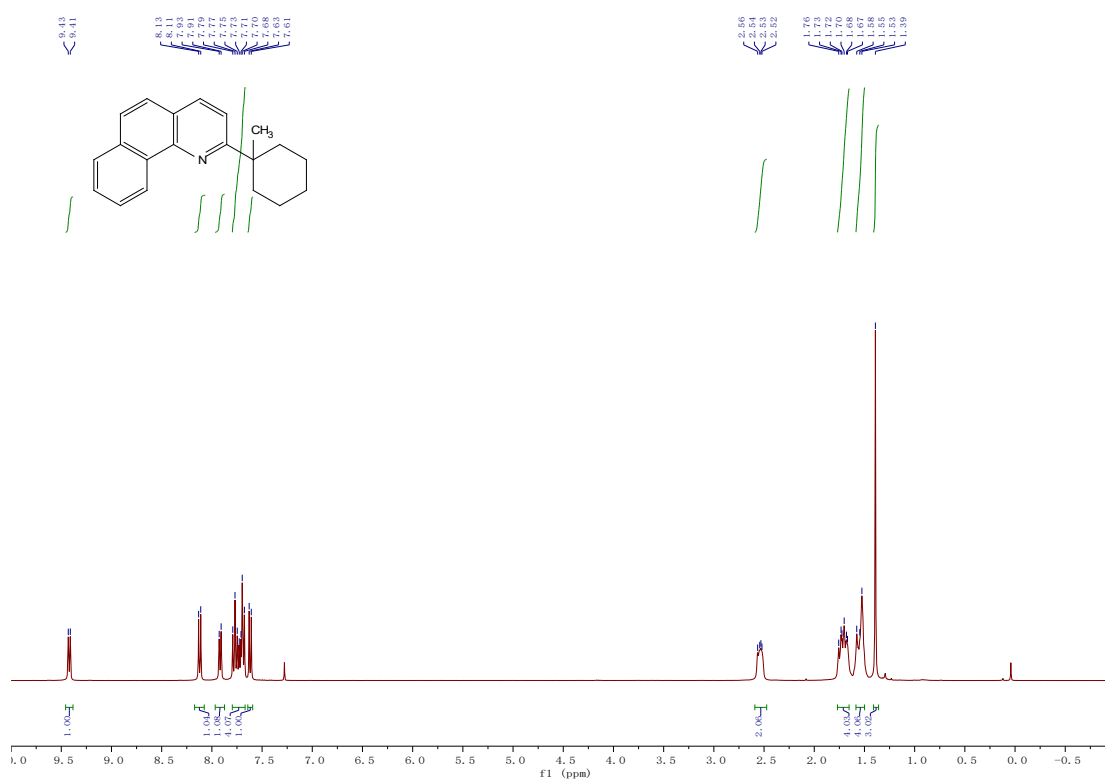

<sup>13</sup>C NMR spectrum (101 MHz, CDCl<sub>3</sub>) of **3t**

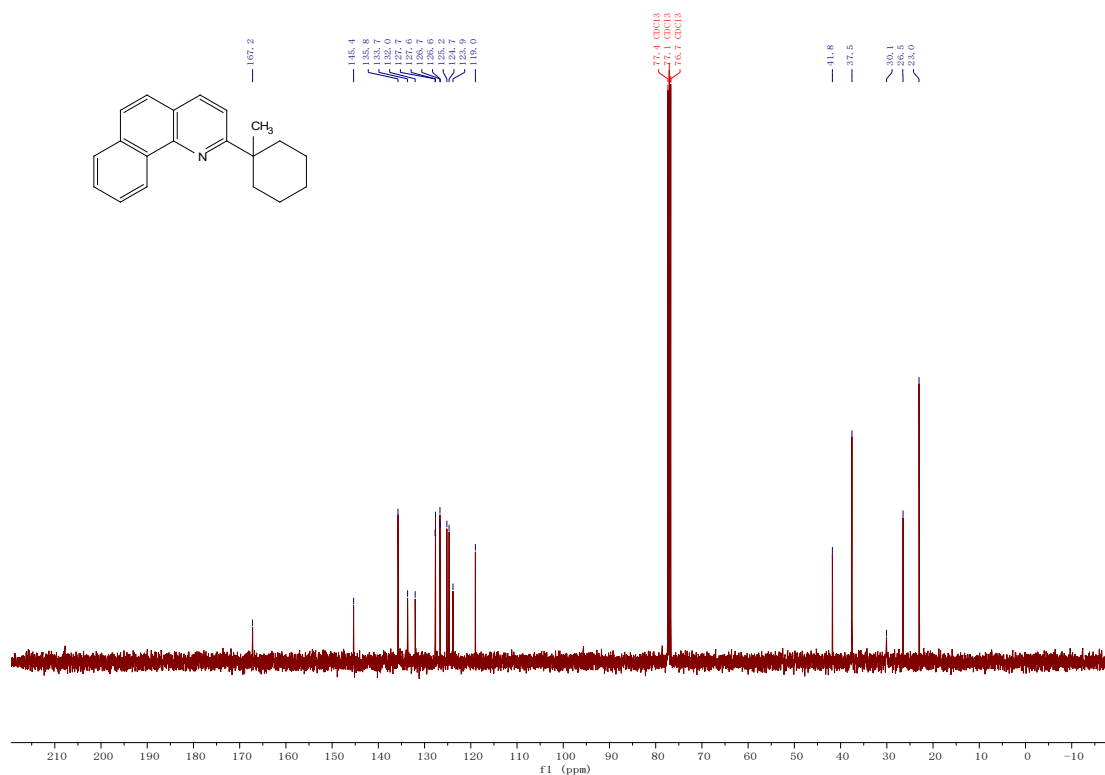

<sup>1</sup>H NMR spectrum (400 MHz, DMSO-*d*<sub>6</sub>) of **3u**

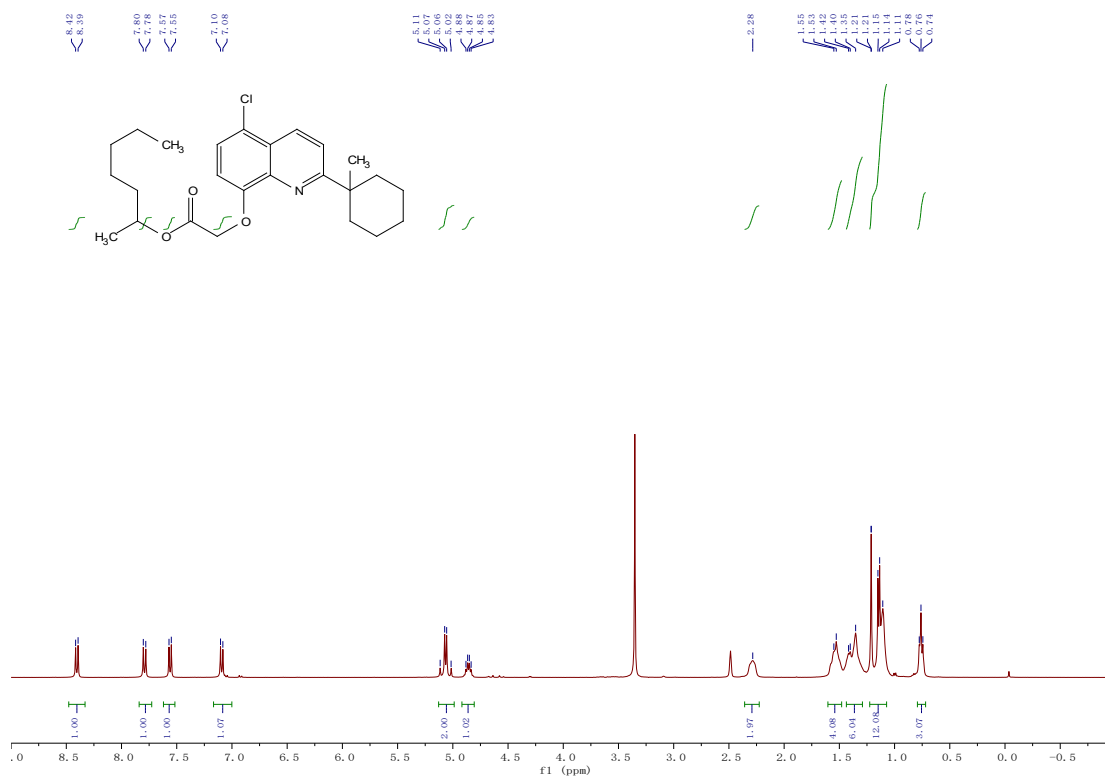

<sup>13</sup>C NMR spectrum (101 MHz, DMSO-*d*<sub>6</sub>) of **3u**

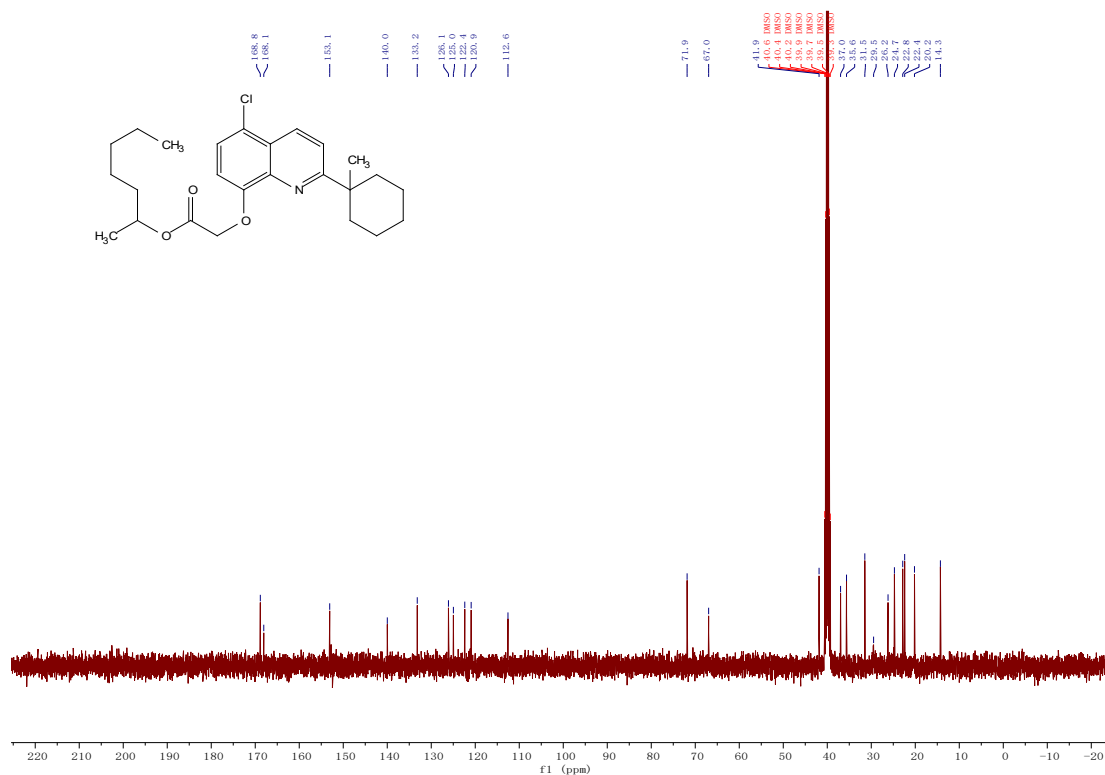

$^1\text{H}$  NMR spectrum (400 MHz,  $\text{CDCl}_3$ ) of **4a**

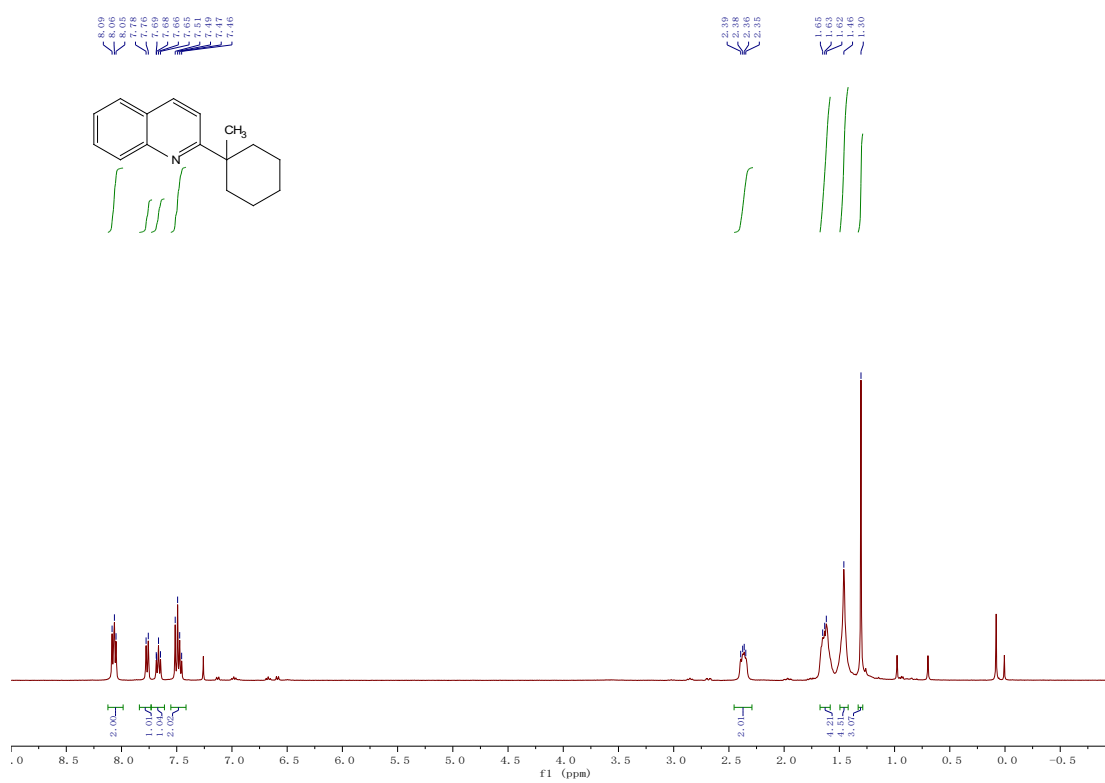

$^{13}\text{C}$  NMR spectrum (101 MHz,  $\text{CDCl}_3$ ) of **4a**

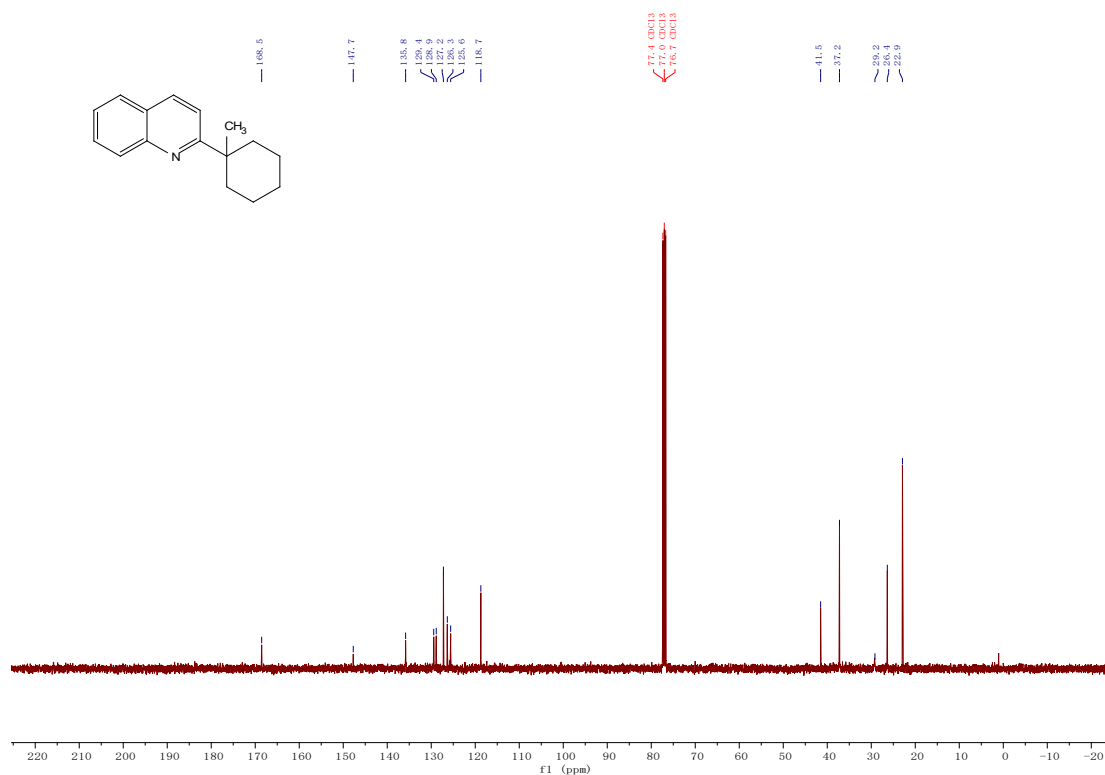



<sup>1</sup>H NMR spectrum (400 MHz, DMSO-*d*<sub>6</sub>) of **4b**

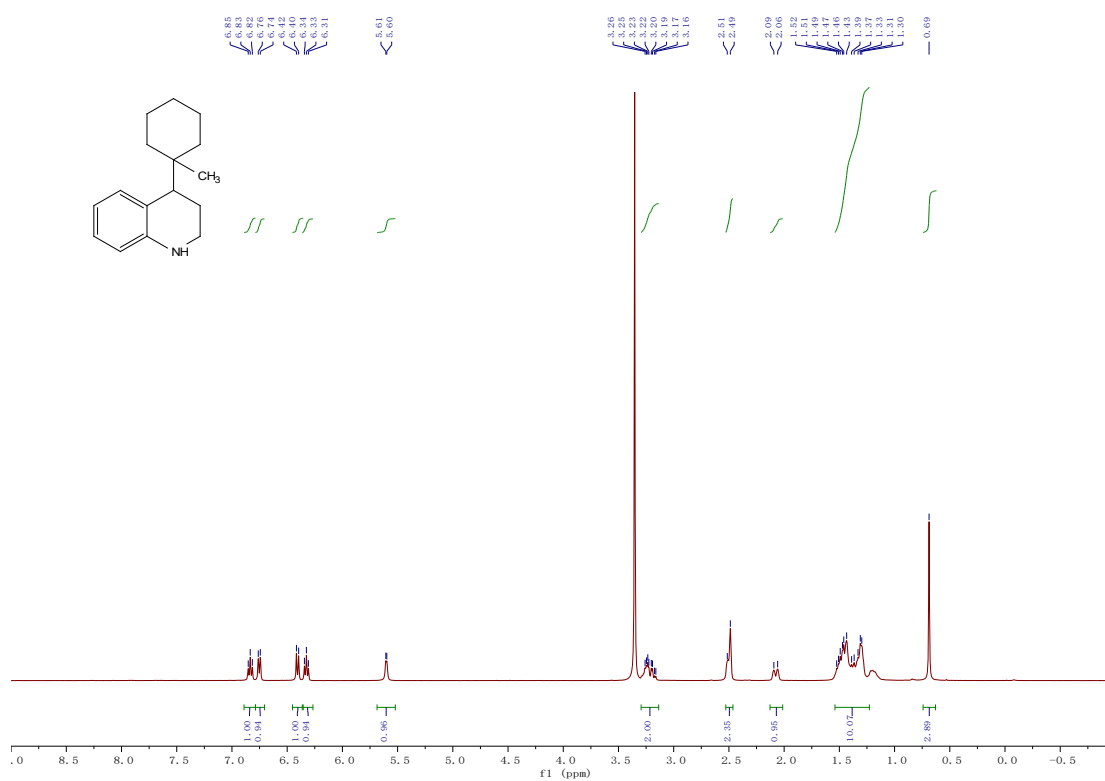

<sup>13</sup>C NMR spectrum (101 MHz, DMSO-*d*<sub>6</sub>) of **4b**

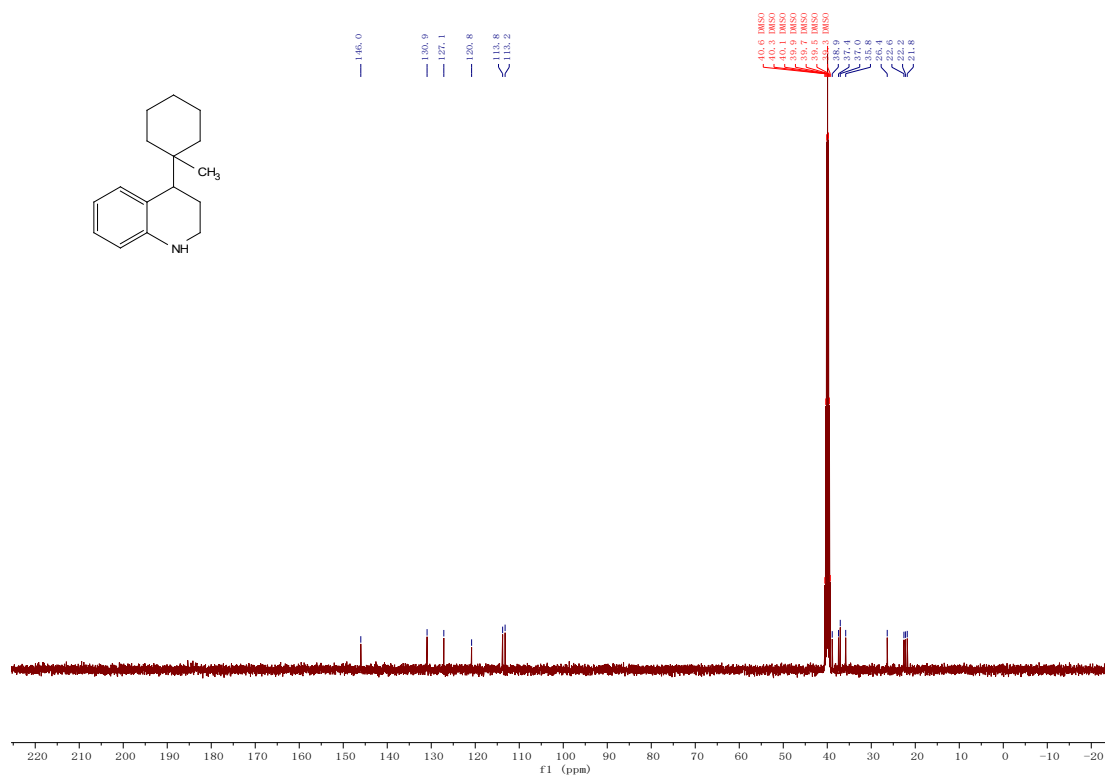



<sup>1</sup>H NMR spectrum (400 MHz, DMSO-*d*<sub>6</sub>) of **5a**

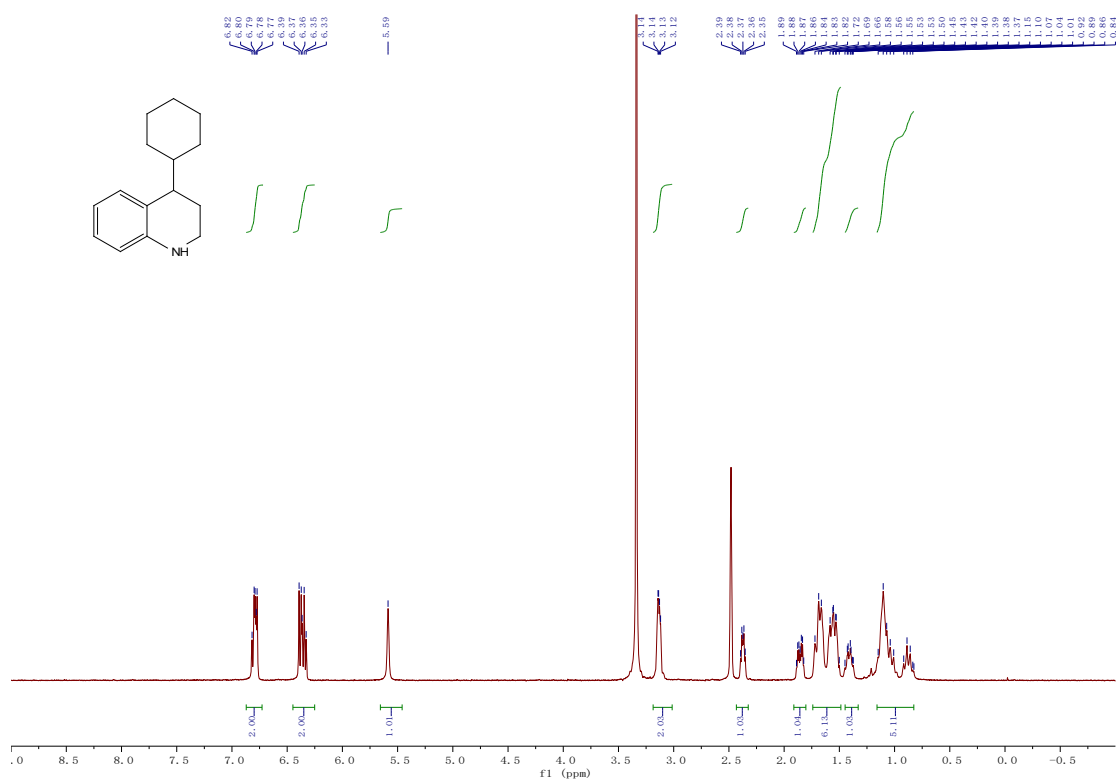

<sup>13</sup>C NMR spectrum (101 MHz, DMSO-*d*<sub>6</sub>) of **5a**

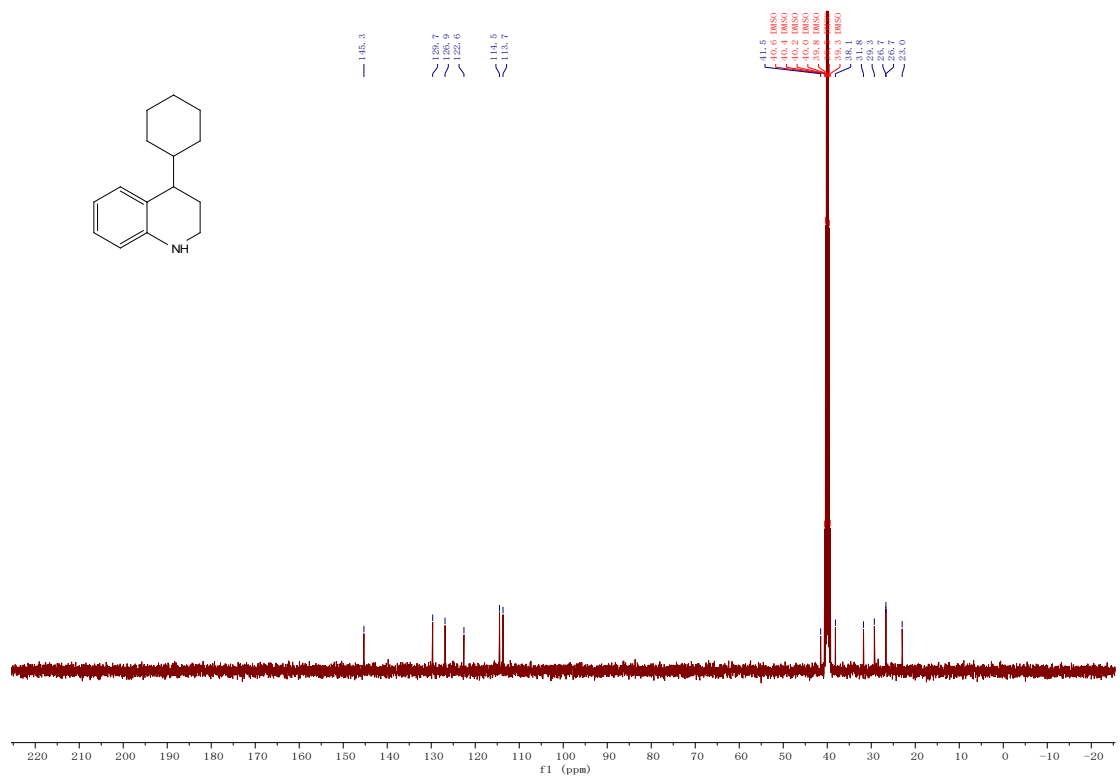

<sup>1</sup>H NMR spectrum (400 MHz, CDCl<sub>3</sub>) of (5b-C2)

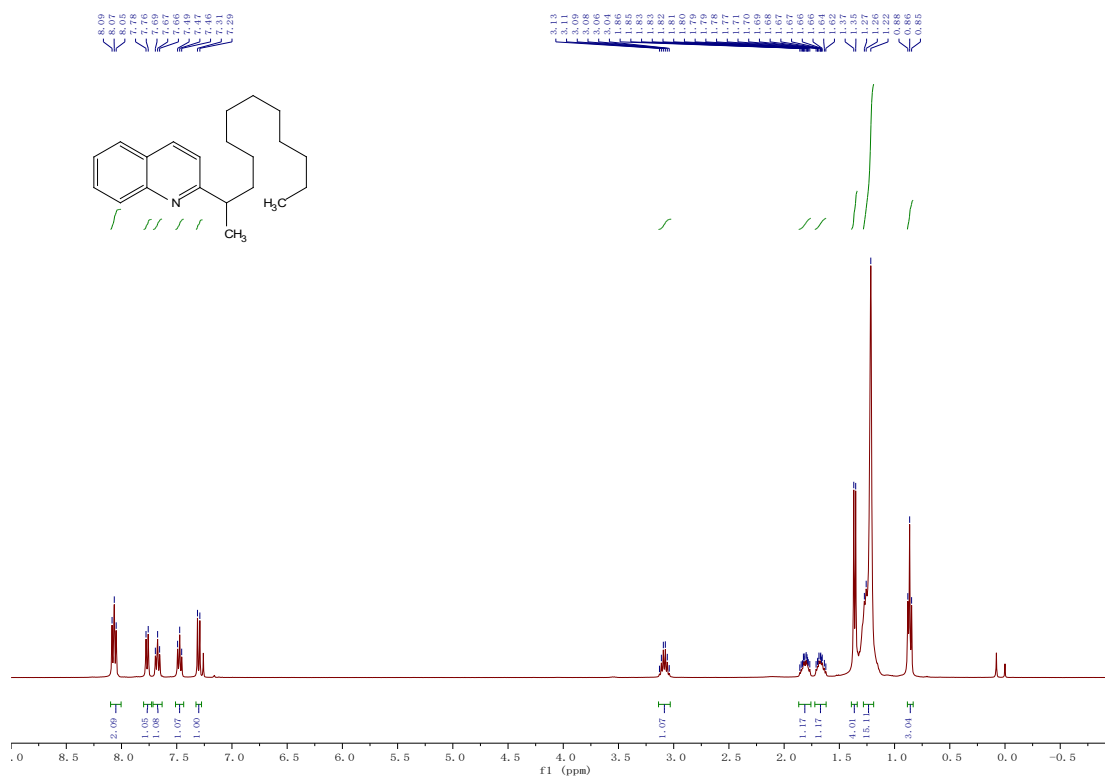

<sup>13</sup>C NMR spectrum (101 MHz, CDCl<sub>3</sub>) of (5b-C2)

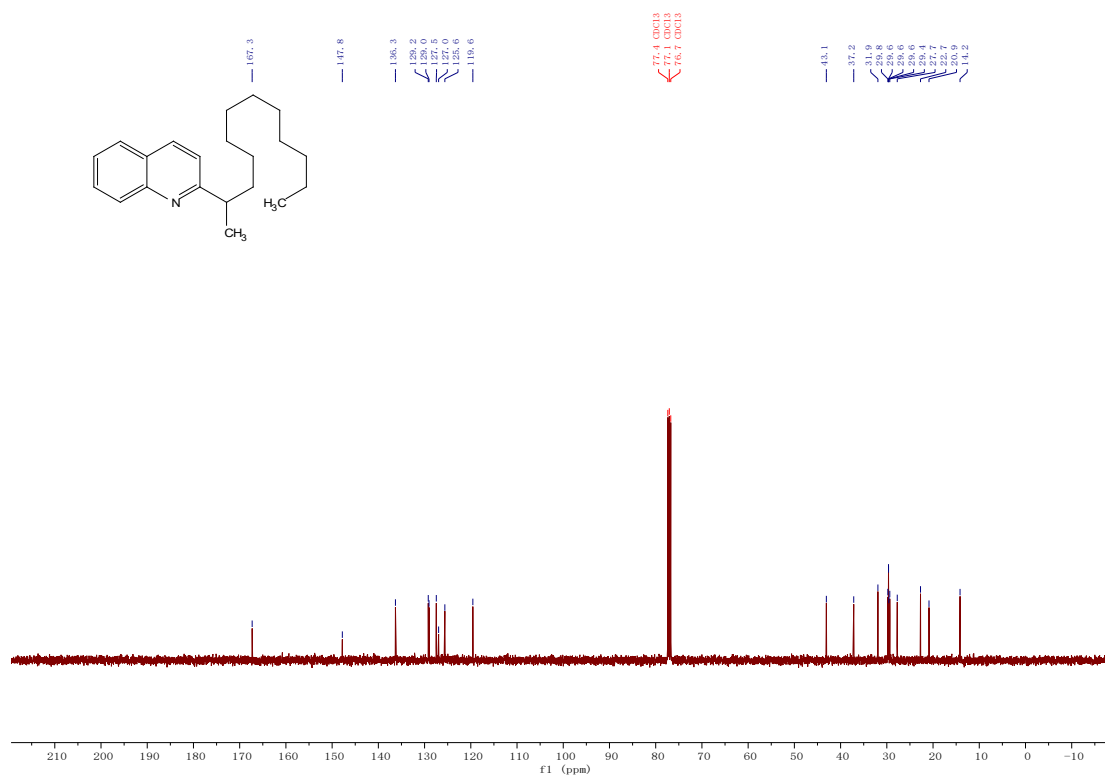





<sup>1</sup>H NMR spectrum (400 MHz, DMSO-*d*<sub>6</sub>) of **5c**

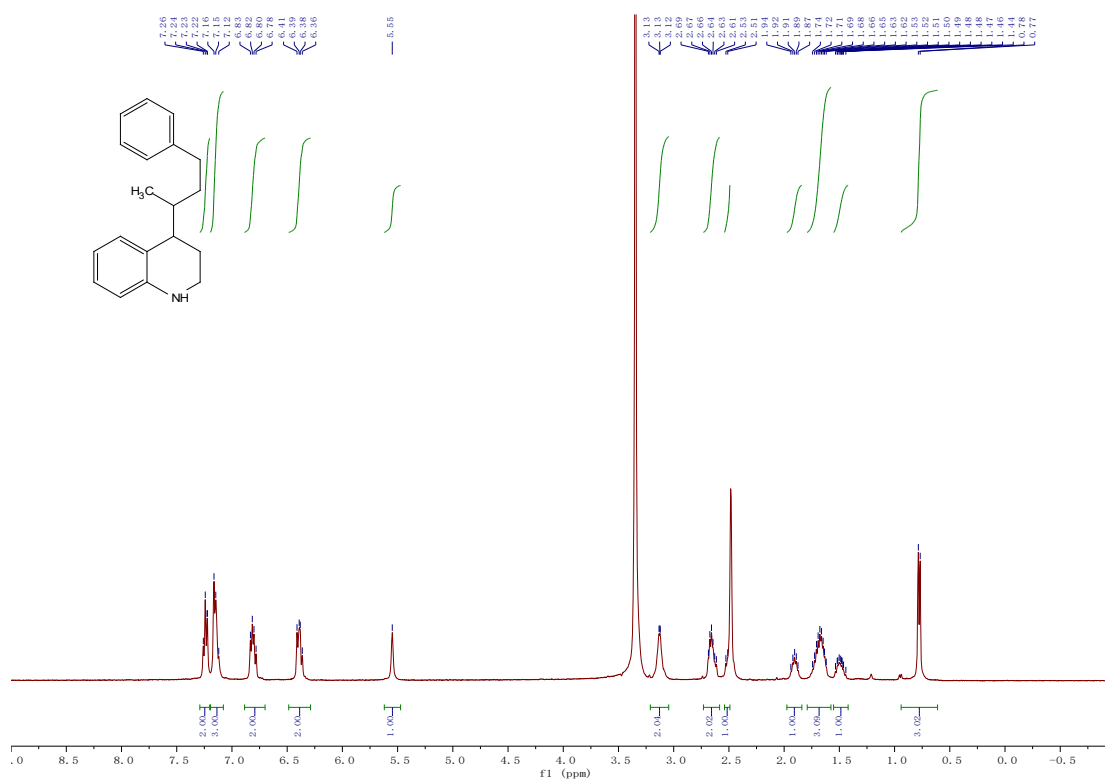

<sup>13</sup>C NMR spectrum (101 MHz, CDCl<sub>3</sub>) of **5c**

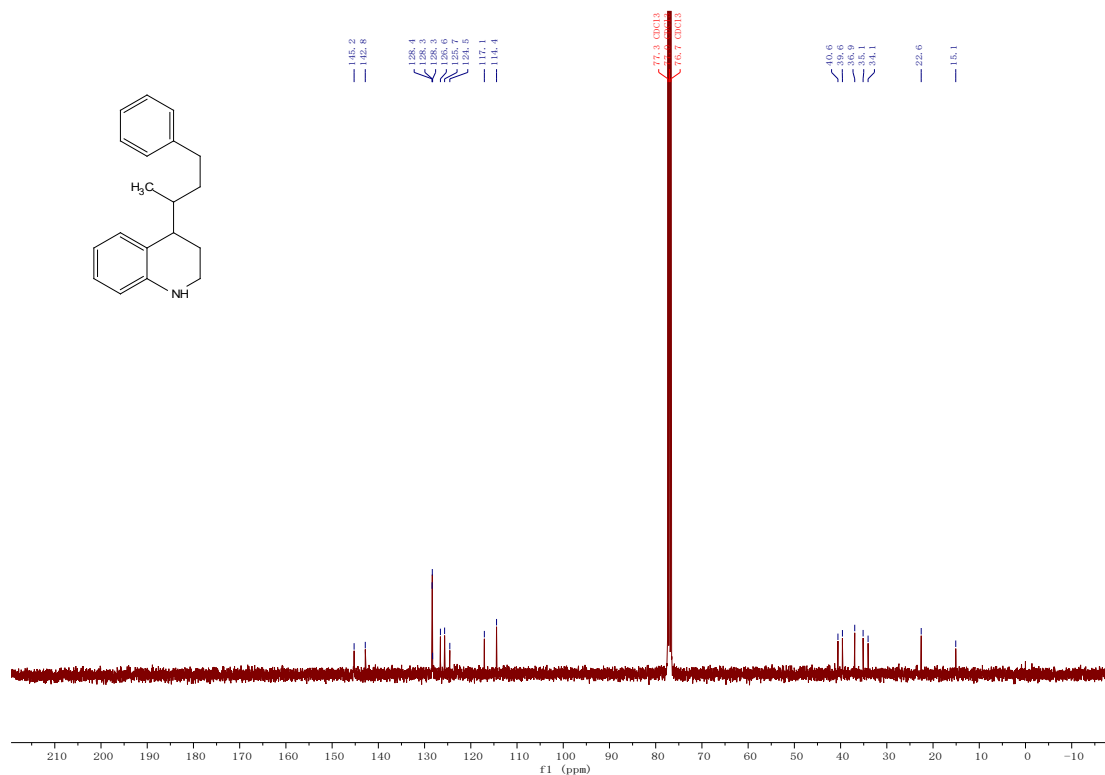

<sup>1</sup>H NMR spectrum (400 MHz, DMSO-*d*<sub>6</sub>) of **5d**

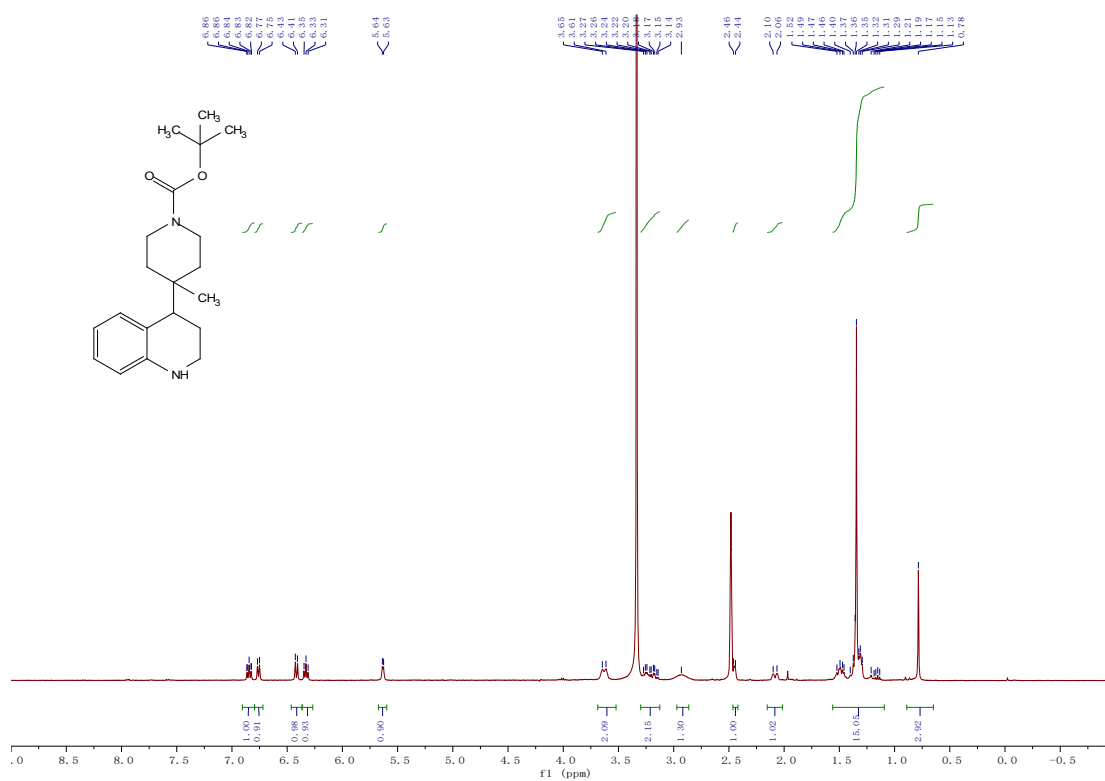

<sup>13</sup>C NMR spectrum (101 MHz, DMSO-*d*<sub>6</sub>) of **5d**

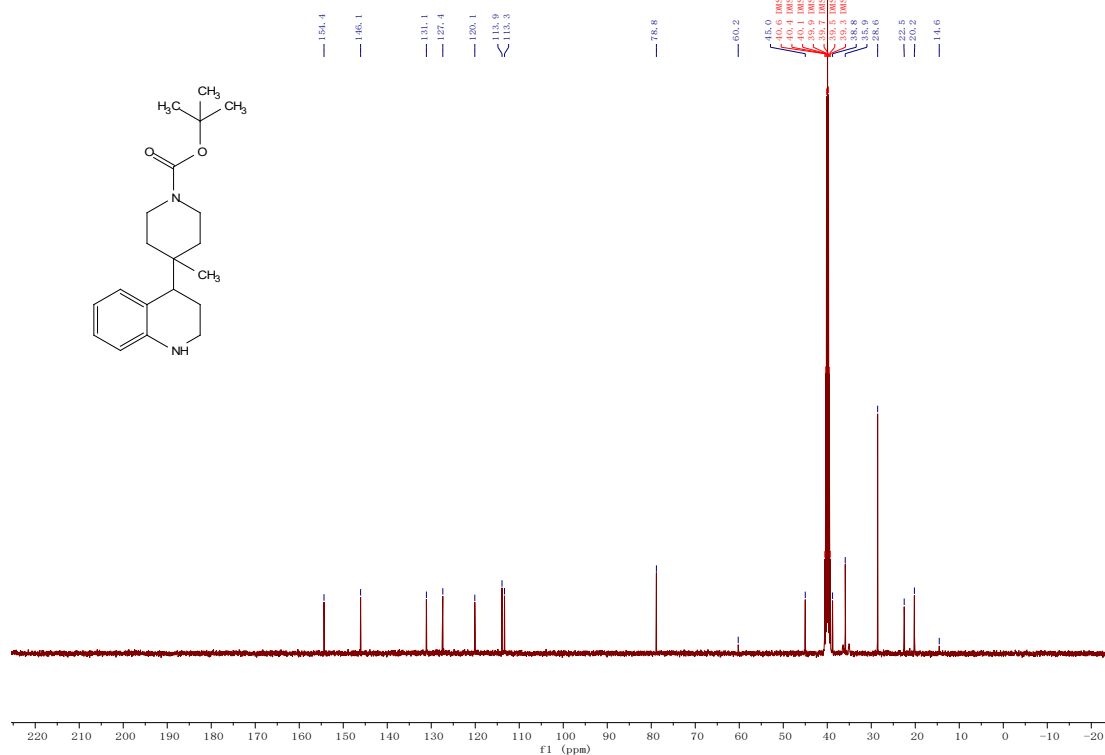



<sup>1</sup>H NMR spectrum (400 MHz, DMSO-*d*<sub>6</sub>) of **5e**

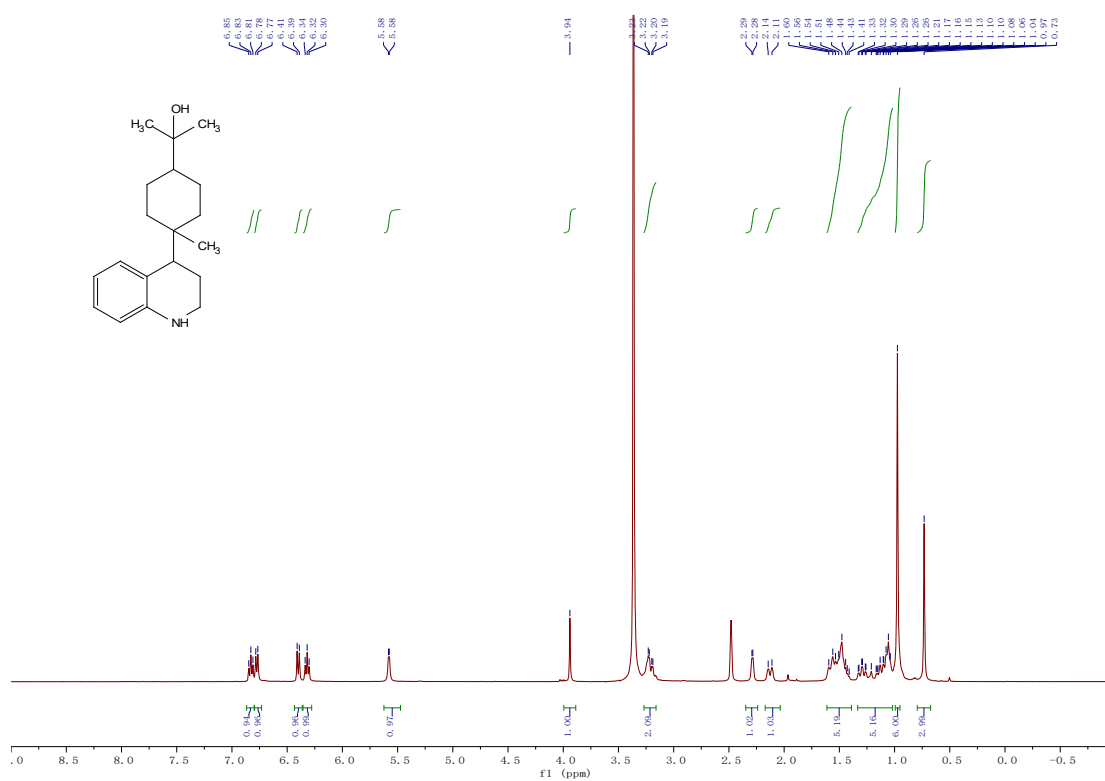

<sup>13</sup>C NMR spectrum (101 MHz, DMSO-*d*<sub>6</sub>) of **5e**

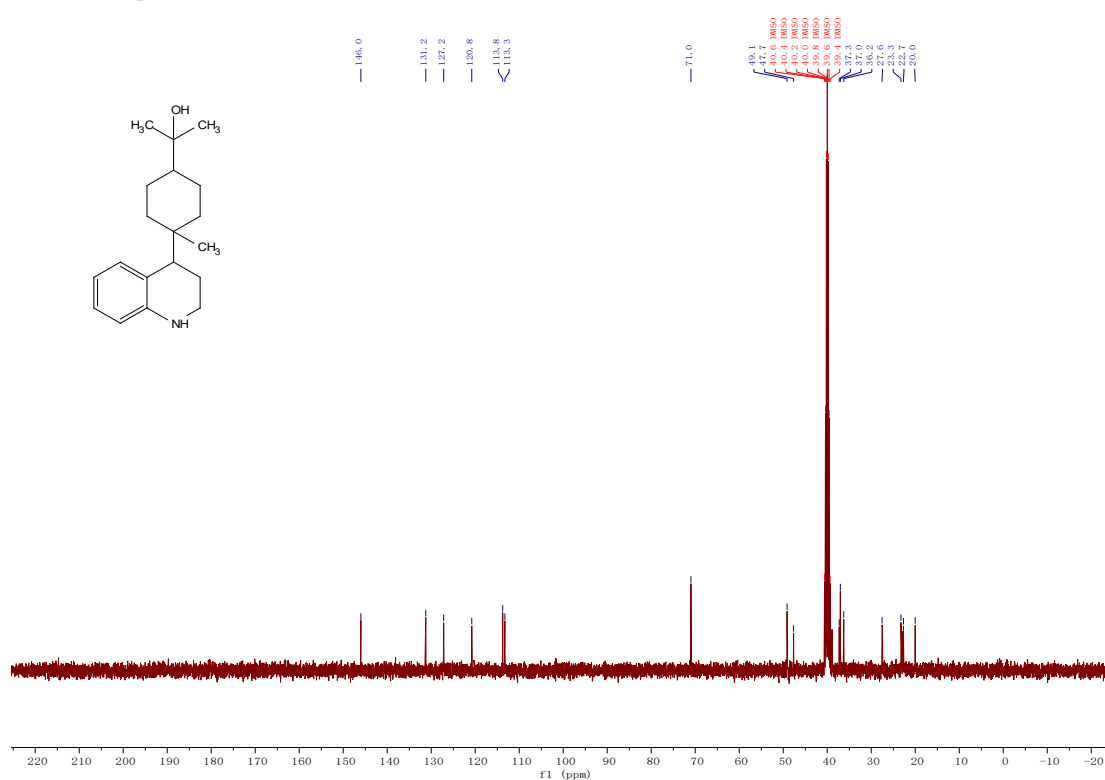

$^1\text{H}$  NMR spectrum (400 MHz,  $\text{CDCl}_3$ ) of **5f**

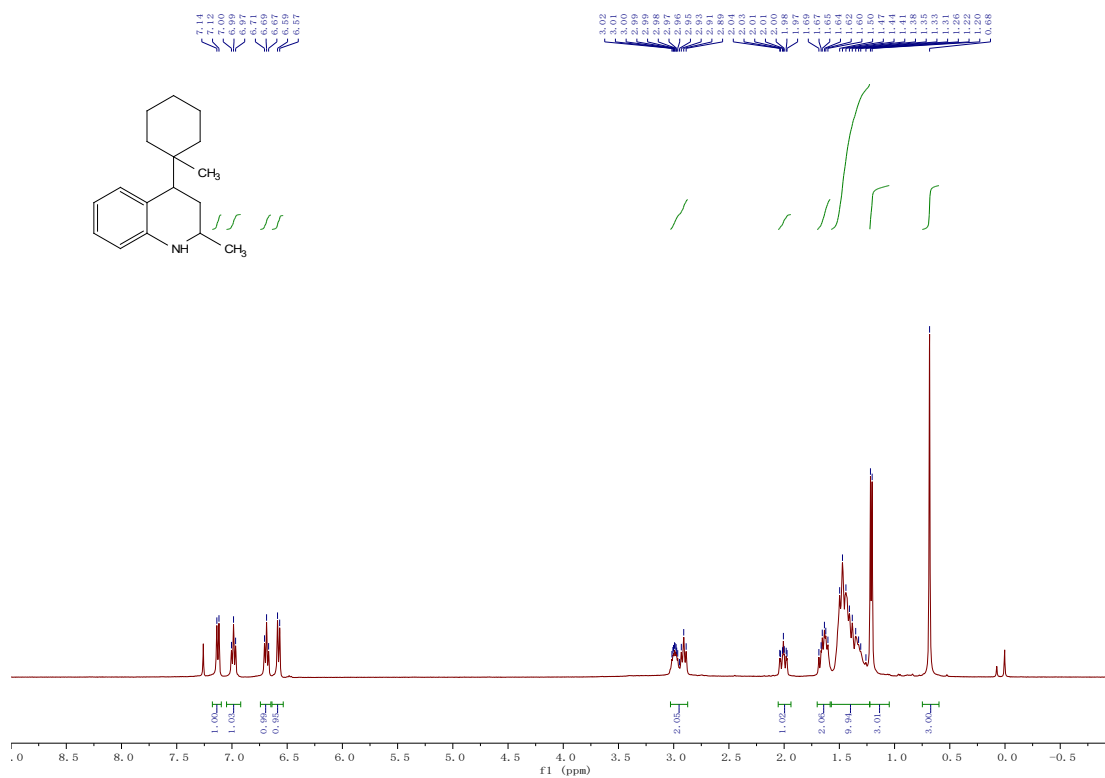

$^{13}\text{C}$  NMR spectrum (101 MHz,  $\text{CDCl}_3$ ) of **5f**

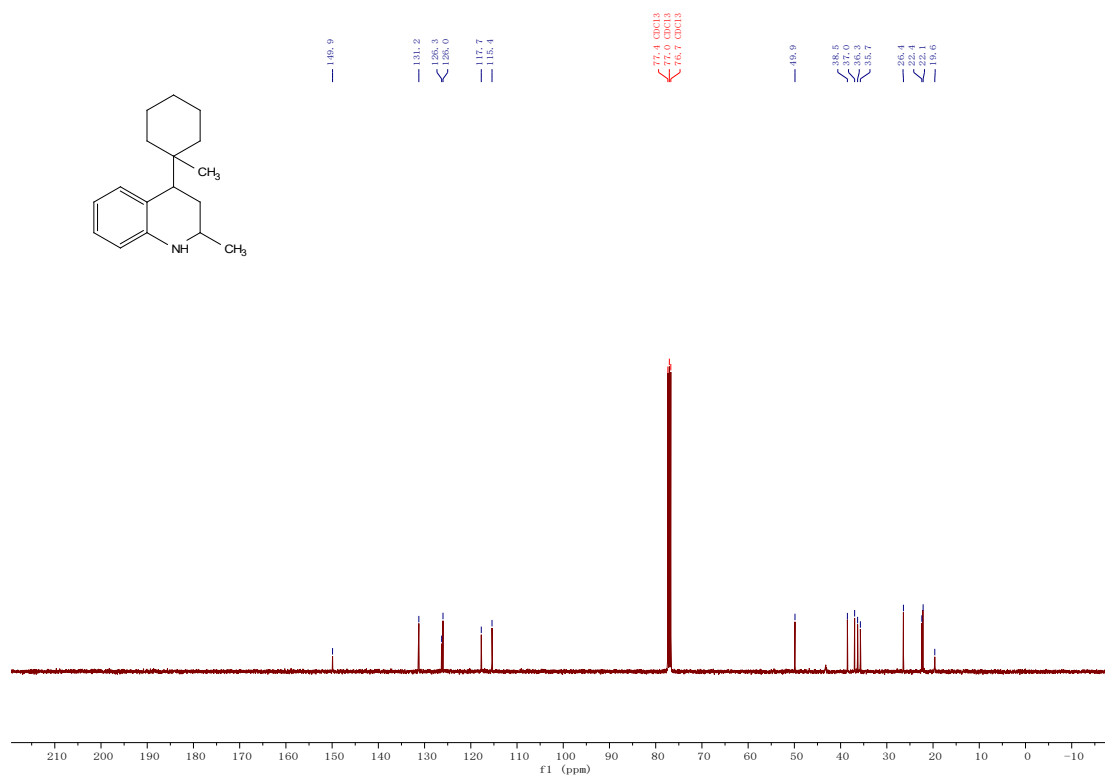



$^1\text{H}$  NMR spectrum (400 MHz,  $\text{CDCl}_3$ ) of **5h**

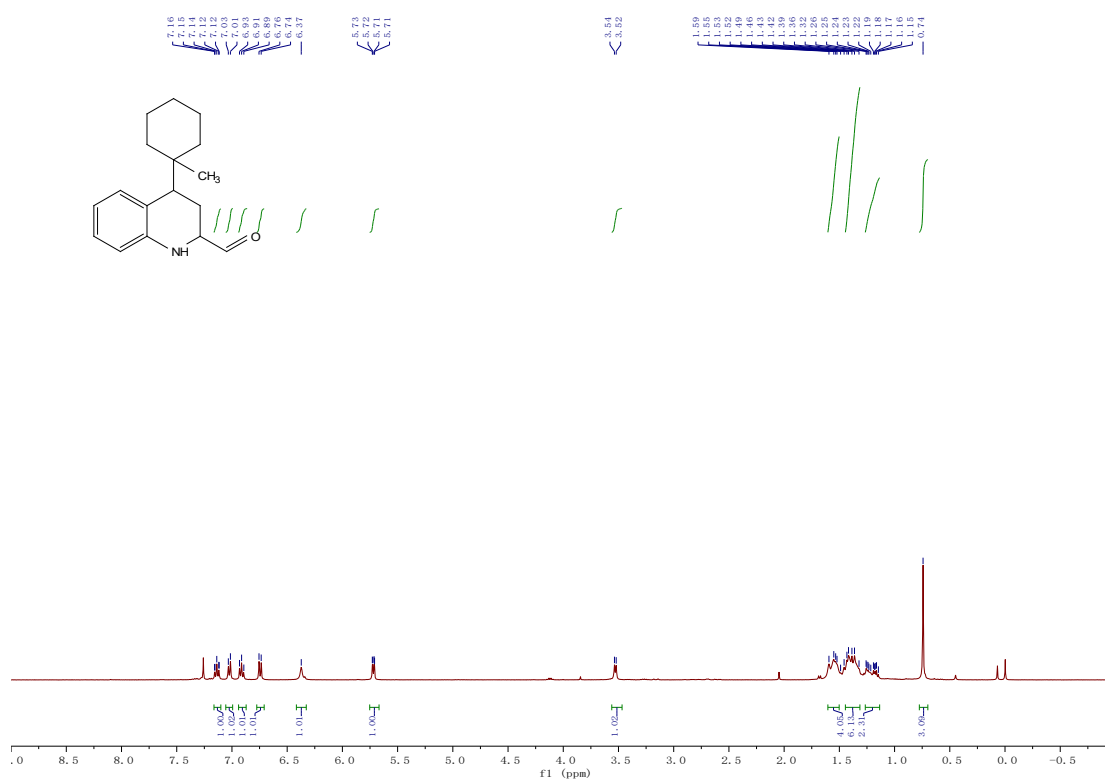

$^{13}\text{C}$  NMR spectrum (101 MHz,  $\text{CDCl}_3$ ) of **5h**

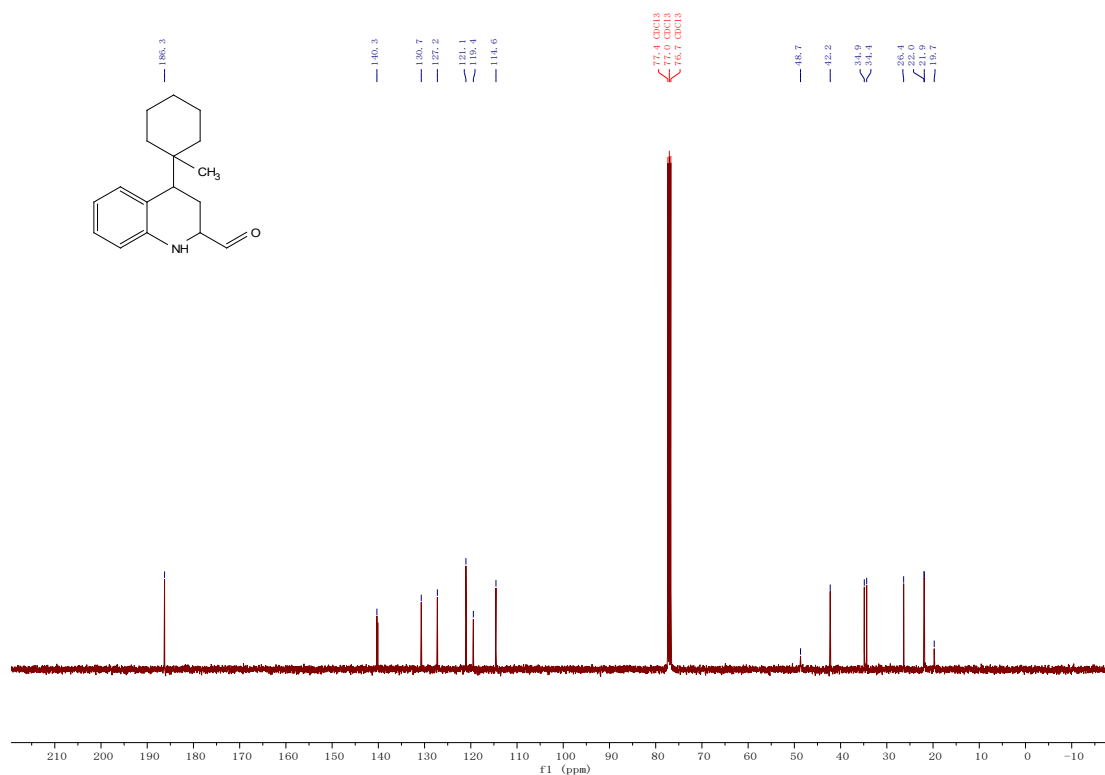

$^1\text{H}$  NMR spectrum (400 MHz,  $\text{CDCl}_3$ ) of **5i**

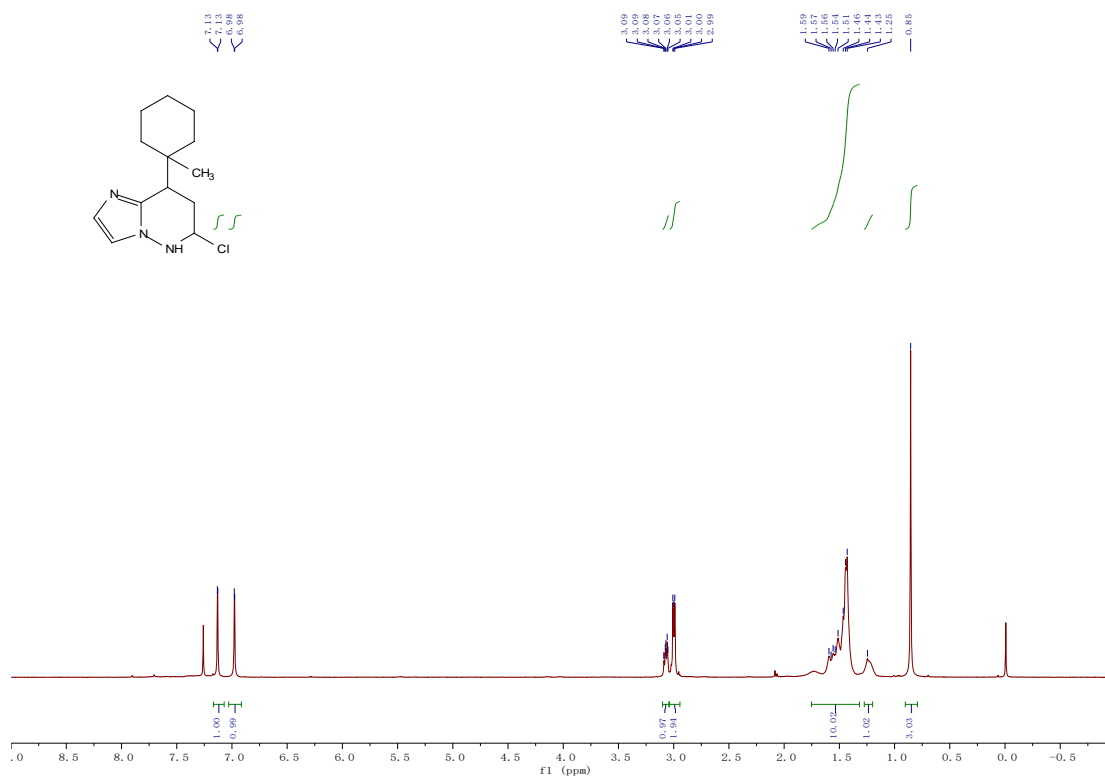

$^{13}\text{C}$  NMR spectrum (101 MHz,  $\text{CDCl}_3$ ) of **5i**

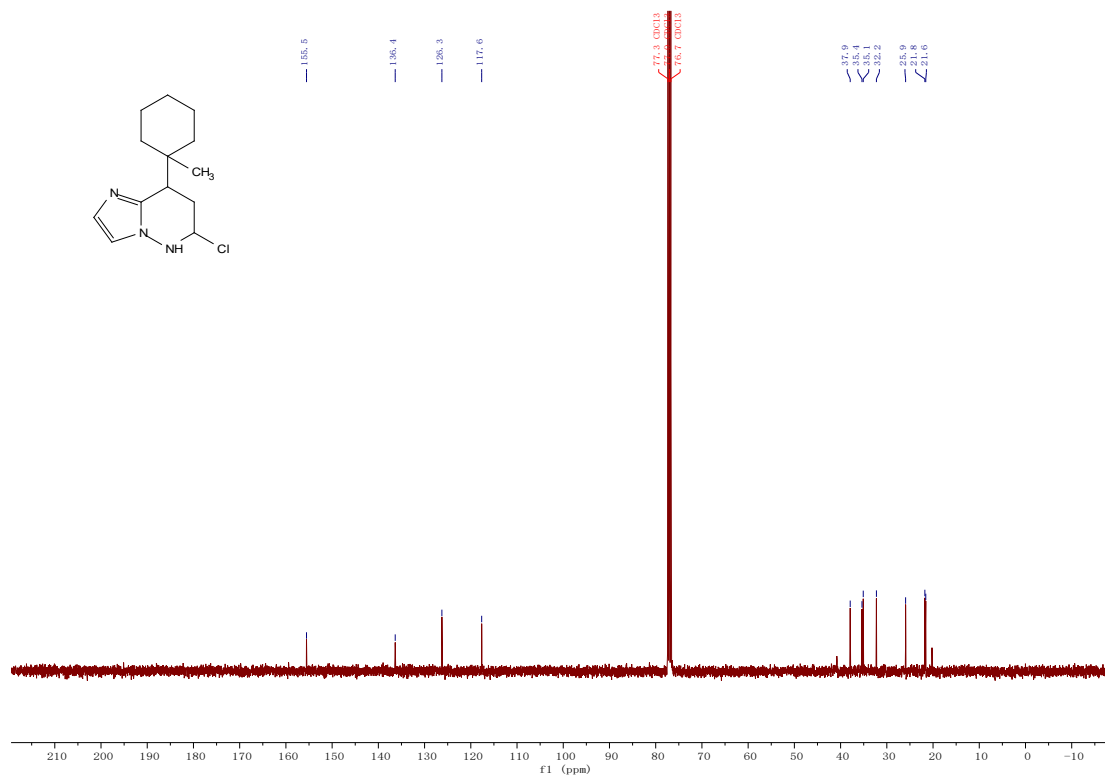

<sup>1</sup>H NMR spectrum (400 MHz, CDCl<sub>3</sub>) of **5j**

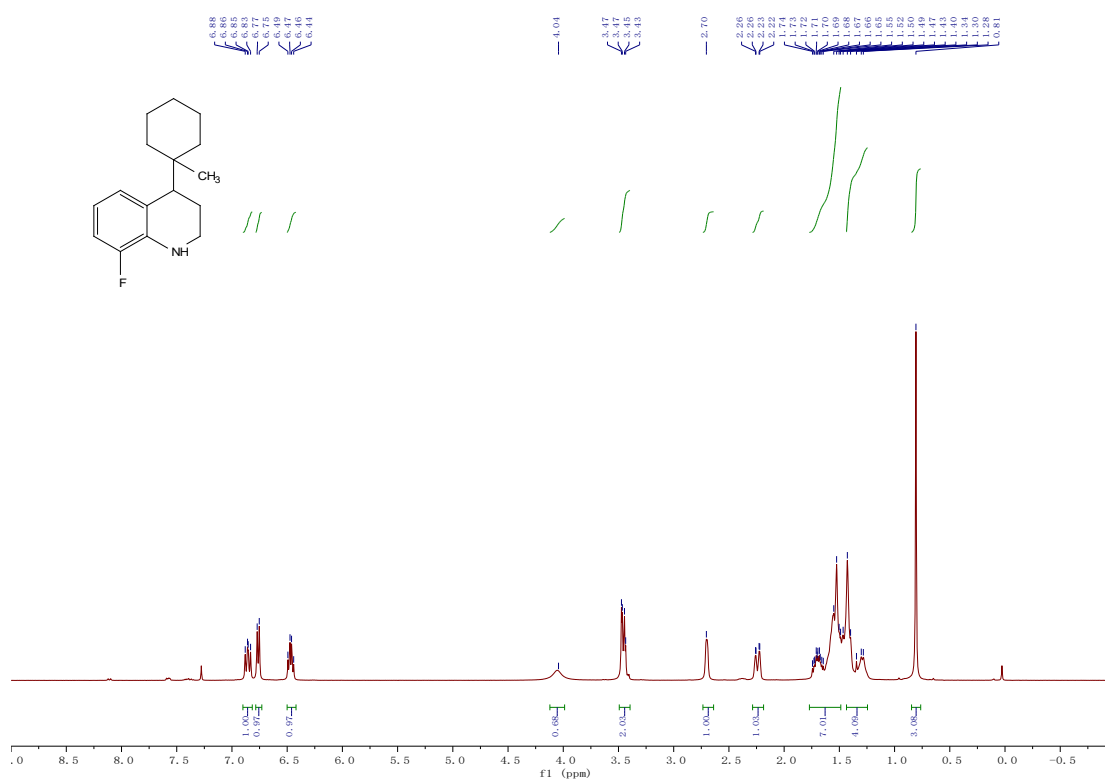

<sup>13</sup>C NMR spectrum (101 MHz, CDCl<sub>3</sub>) of **5j**

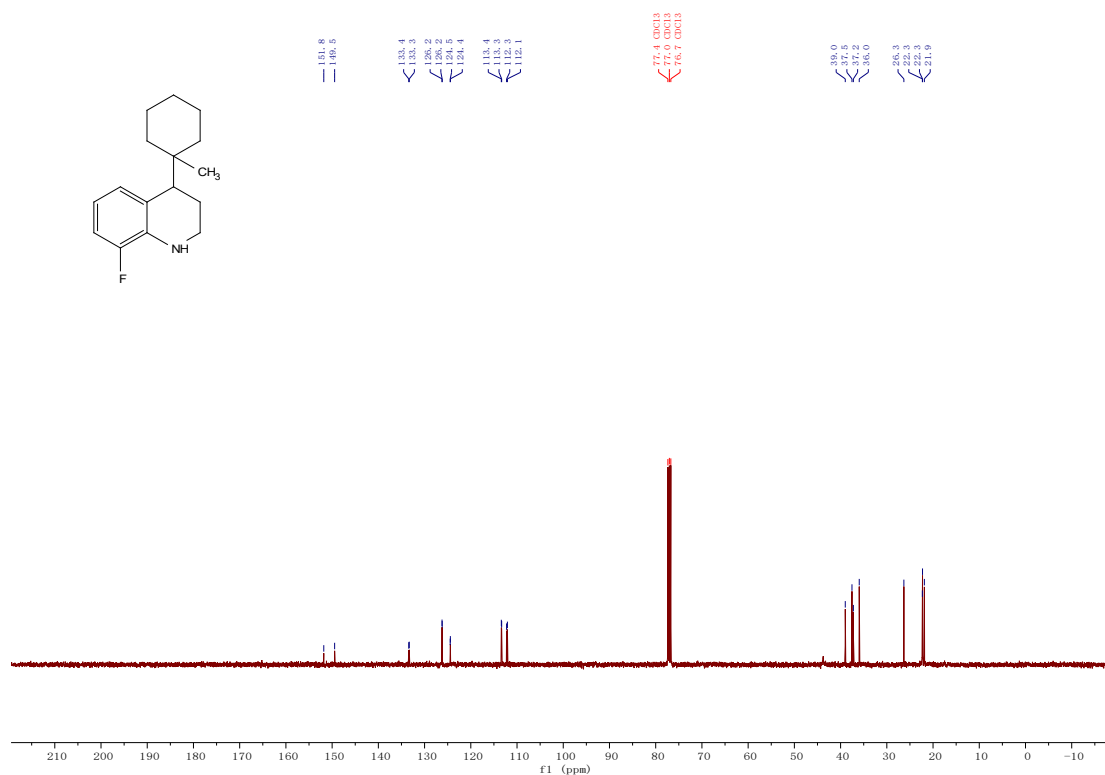

$^{19}\text{F}$  NMR spectrum (376 MHz,  $\text{CDCl}_3$ ) of **5j**

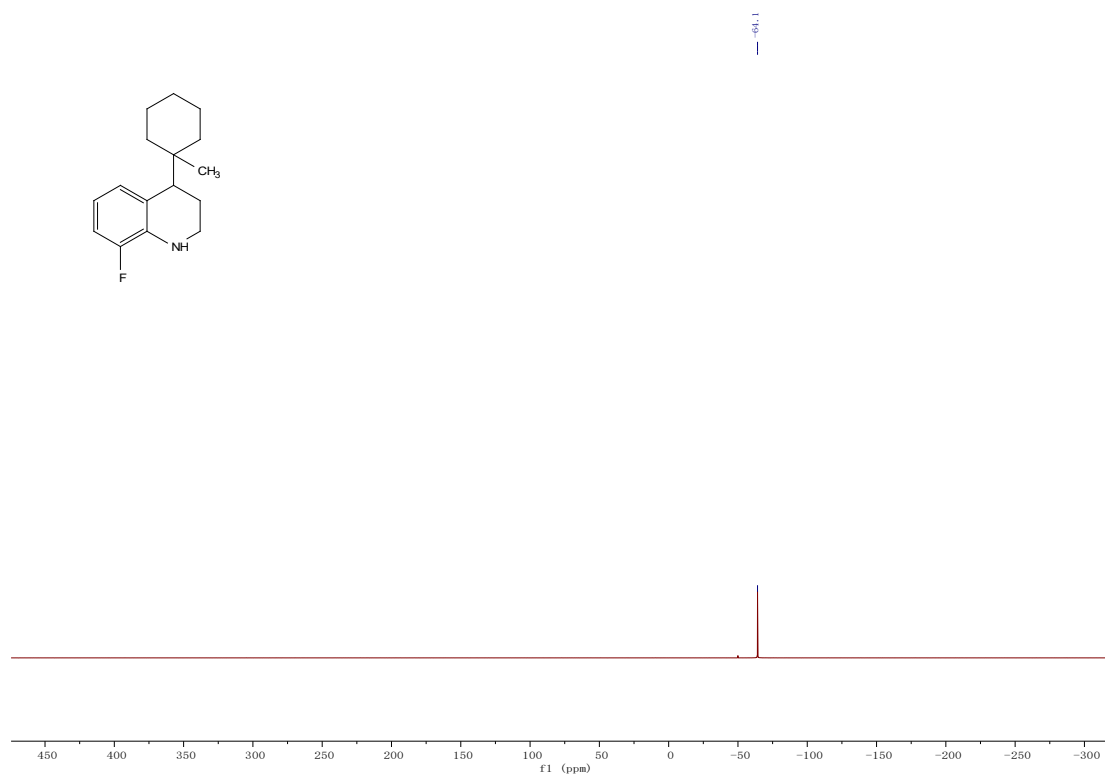

$^1\text{H}$  NMR spectrum (400 MHz,  $\text{DMSO-}d_6$ ) of **5k**

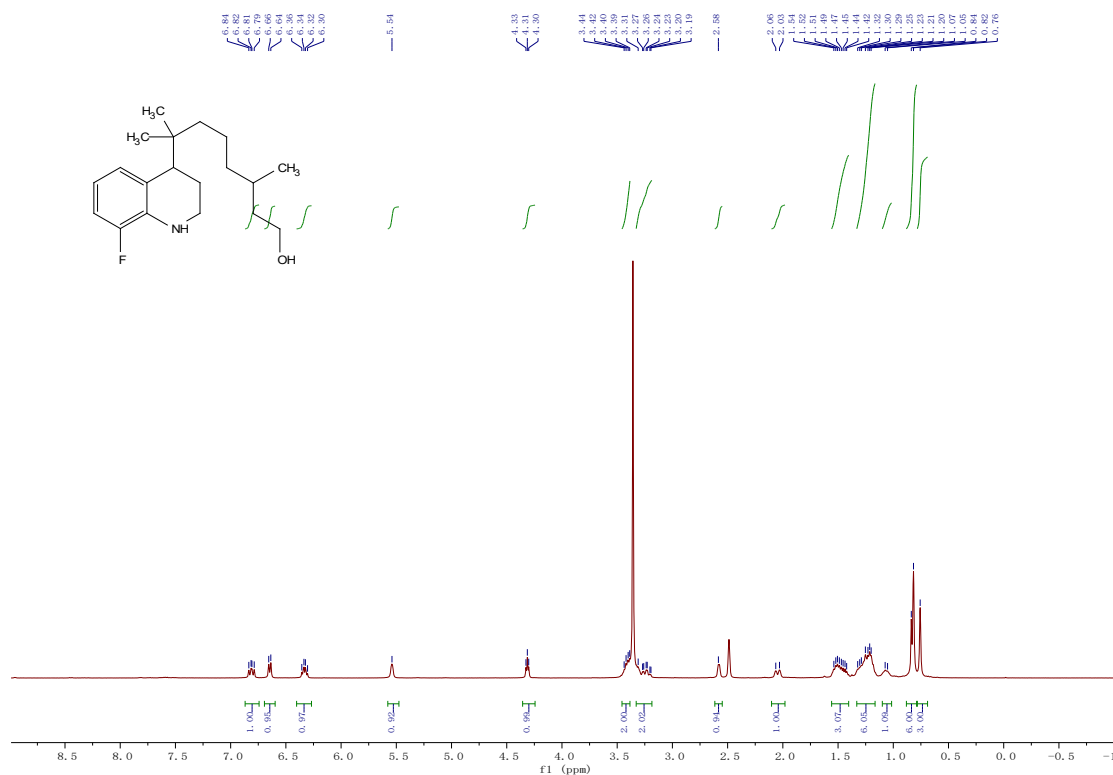

$^{13}\text{C}$  NMR spectrum (101 MHz,  $\text{DMSO-}d_6$ ) of **5k**

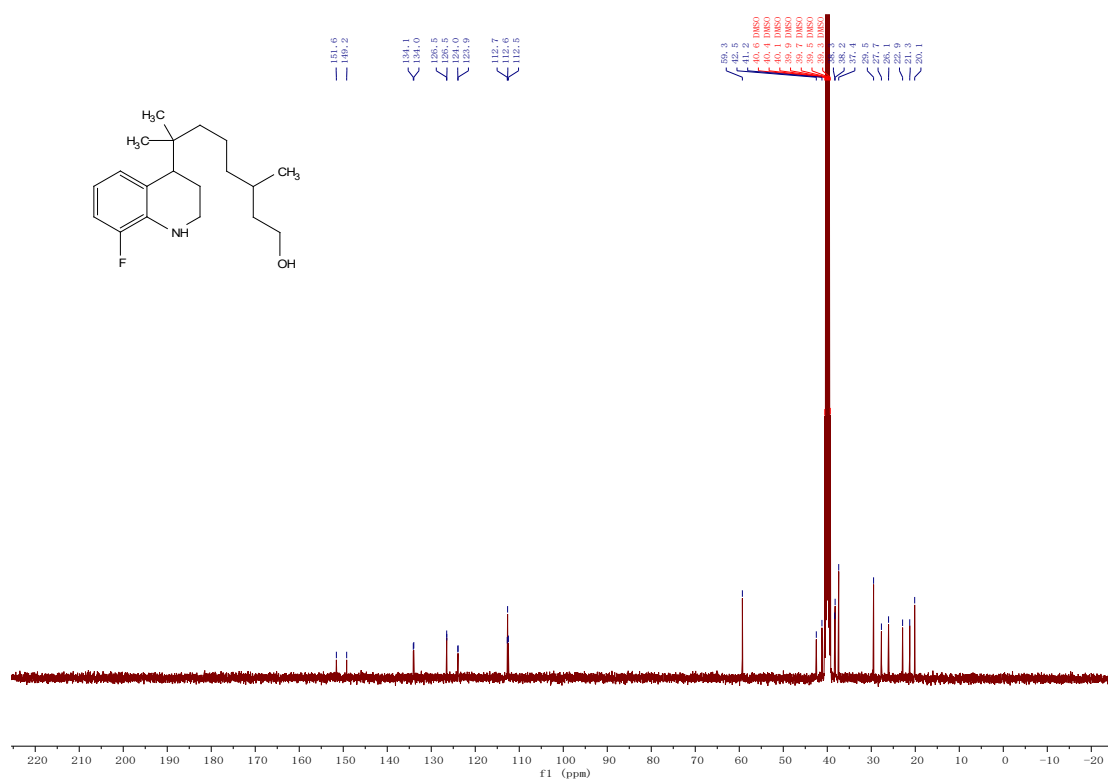

$^{19}\text{F}$  NMR spectrum (376 MHz,  $\text{DMSO-}d_6$ ) of **5k**

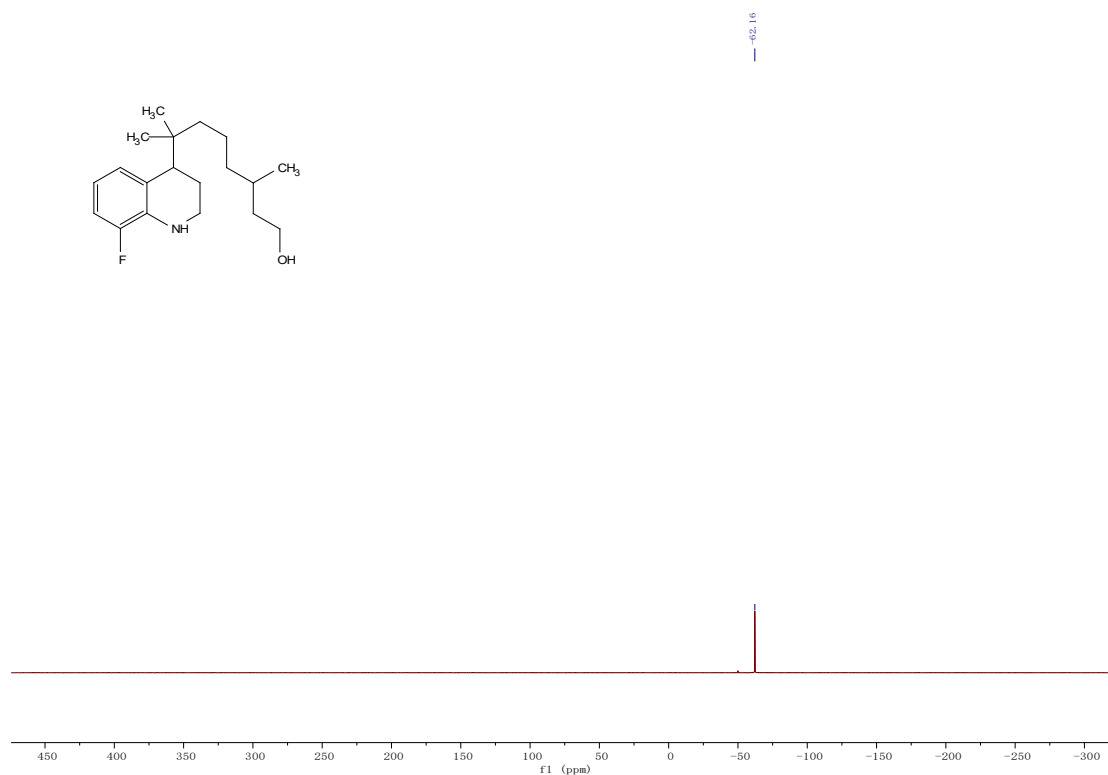



<sup>1</sup>H NMR spectrum (400 MHz, DMSO-*d*<sub>6</sub>) of **51**

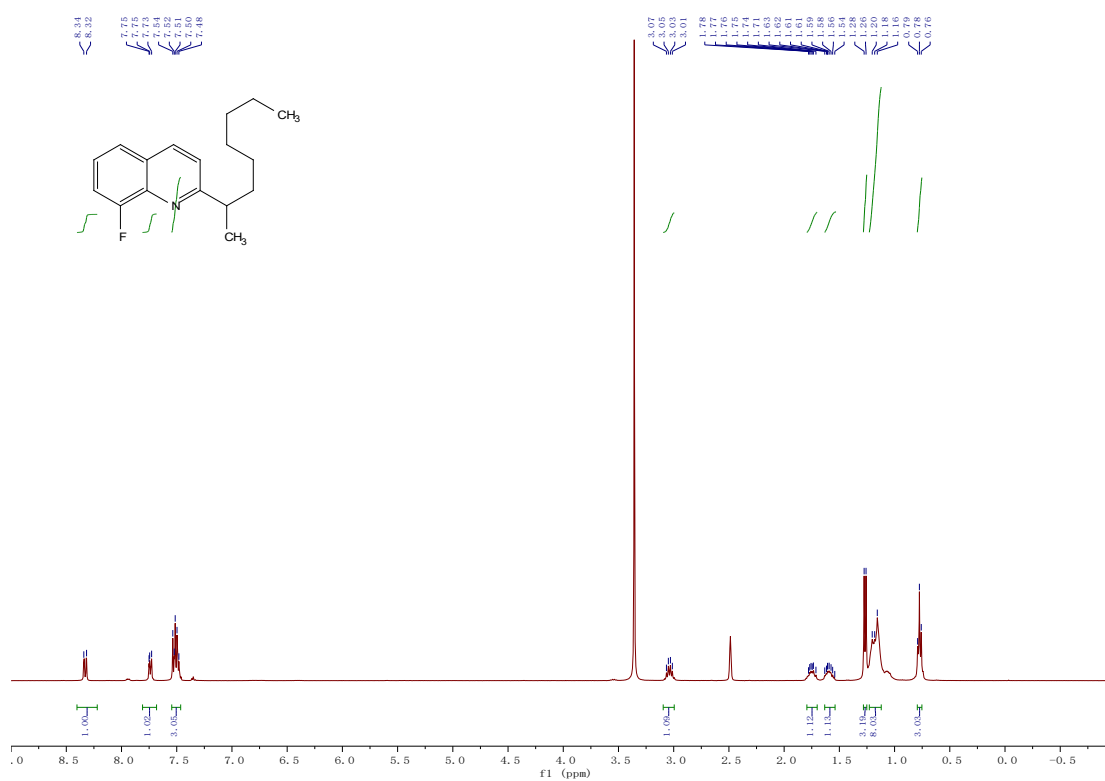

<sup>13</sup>C NMR spectrum (101 MHz, DMSO-*d*<sub>6</sub>) of **51**

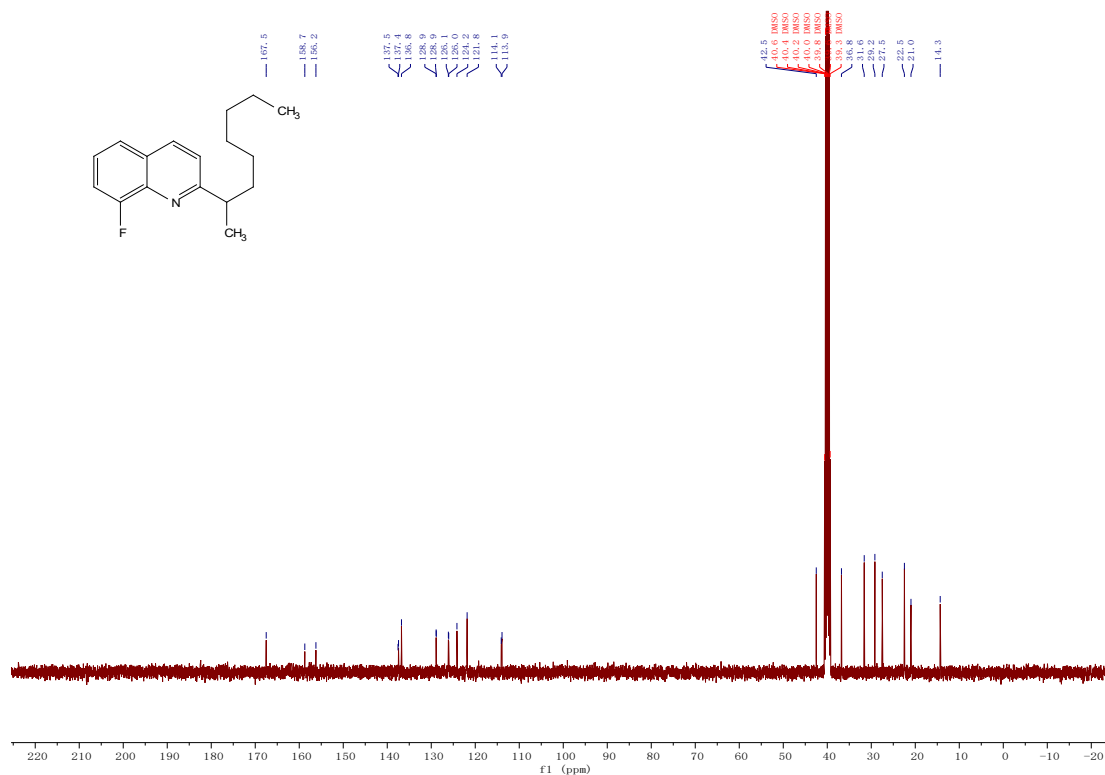

$^{19}\text{F}$  NMR spectrum (376 MHz,  $\text{DMSO-}d_6$ ) of **5l**

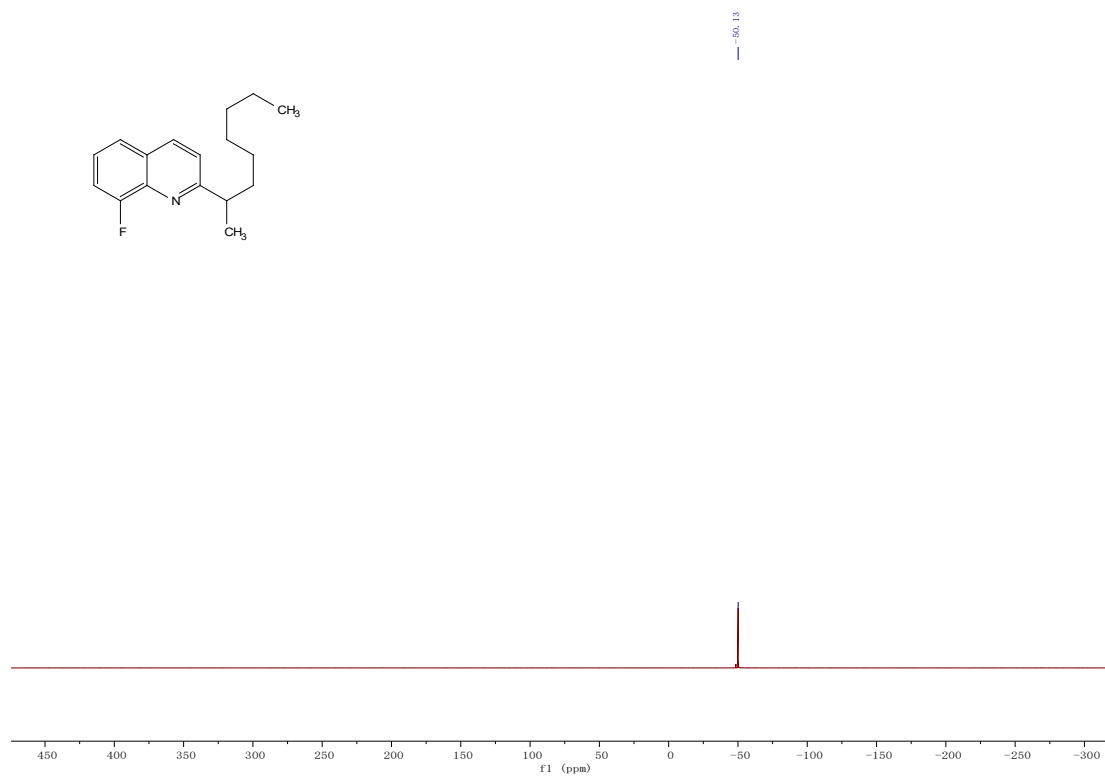

$^1\text{H}$  NMR spectrum (400 MHz,  $\text{CDCl}_3$ ) of **5m**

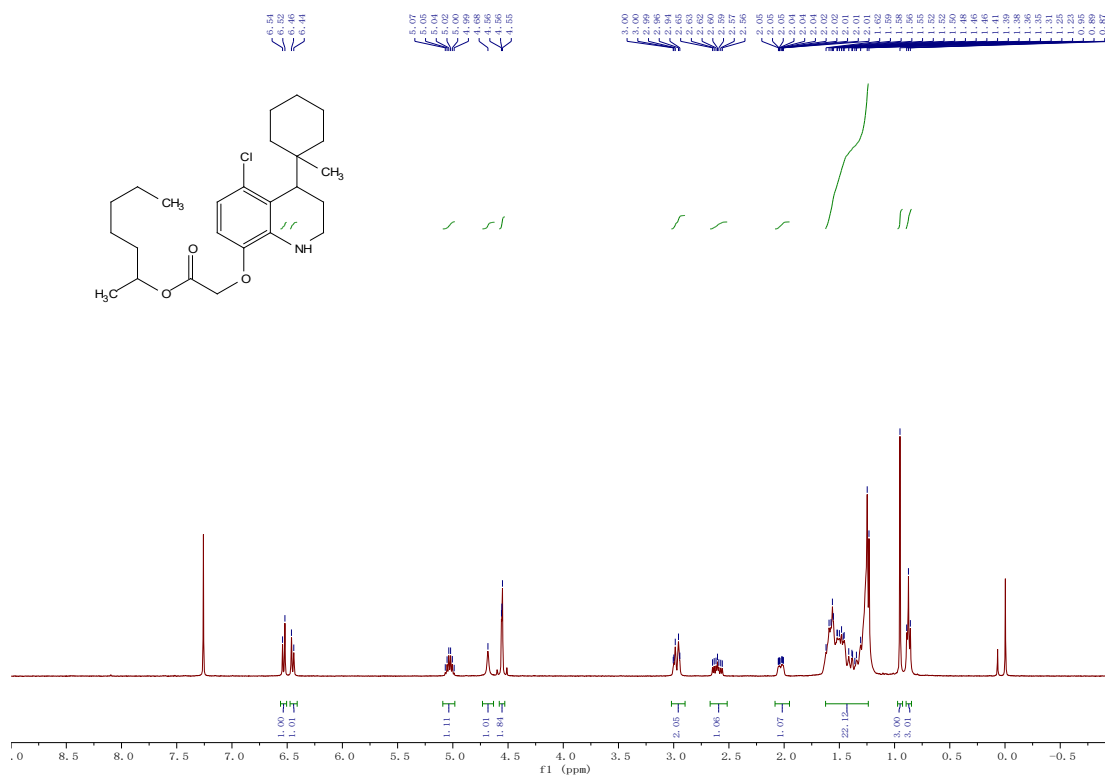

Supplement: d2qo01985j1.pdf [file d2qo01985j1.pdf]
